# Supplementary material for: Machine learning models outperform deep learning models, provide interpretation and facilitate feature selection for soybean trait prediction
Source: BMC Plant Biol. 2022 Apr 8;22:180. doi: 10.1186/s12870-022-03559-z (PMC8991976; doi:10.1186/s12870-022-03559-z)
Supplement: Supplementary file 1 — Additional file 1: Supplementary Figure 1. P-value of each SNPs association for a) flower colour b) seed coat colour c) pod colour in the soybean VCF. SNPs coloured red have been determined as significantly associated for the given trait as they have a p-value less than the -log10(8) significance threshold for this GWAS. Supplementary Figure 2. Graphs ranking the top 20 most input SNPs by gain as identified by XGBoost models for trait predictions for traits with regions of importance identified from XGBoost. Blue bars are region of importance, whereas other colours represent collections of important SNPs on the same chromosome. Black bars represent left over SNPs with no relation to other SNPs in the ranking. SNP rankings for genome wide SNP input for A) flower colour B) seed coat colour C) pubescence density D) seed weight. Supplementary Figure 3. Top 20 ranked SNPs for XGBoost Seed Oil Prediction. Supplementary Figure 4. Top 20 ranked SNPs for XGBoost Pod Colour Prediction. Supplementary Figure 5. Top 20 ranked SNPs for XGBoost Seed Protein Prediction. Supplementary Table 1. Targeted Regions of SNPs for Reduced Input Models. Supplementary Table 2. List of soybean germplasm in the pangenome with the sequence coverage. (ND, not defined). Supplementary Table 3. Trait Data Types. [file 12870_2022_3559_MOESM1_ESM.zip › suppl_table_2_accesssions_meta_data.pdf]

**Supplementary Table 2. List of soybean germplasm in the pangenome with the sequence coverage. (ND, not defined)**

| Data-storage-ID | PI-ID          | Estimated coverage (Gbp) | Species       | Group           | Origin country | Origin  | Collection year | Plant name      | Gene number | Maturity group |
|-----------------|----------------|--------------------------|---------------|-----------------|----------------|---------|-----------------|-----------------|-------------|----------------|
| AB-01           | PI458020       | 19.90                    | <i>G. max</i> | Landrace        | Korea          | Seoul   | 1981            | KAS 100-11-2    | 48643       | IV             |
| AB-02           | PI603713       | 27.95                    | <i>G. max</i> | Landrace        | China          | Sichuan | 1998            | ZDD12392        | 48762       | V              |
| BR-01           | PI628809       | 21.22                    | <i>G. max</i> | Modern cultivar | Brazil         | ND      | 2001            | BR-16           | 48913       | VI             |
| BR-02           | BRS 232        | 12.83                    | <i>G. max</i> | Modern cultivar | Brazil         | ND      | ND              | ND              | 48800       | VII            |
| BR-03           | PI675651       | 17.81                    | <i>G. max</i> | Modern cultivar | Brazil         | ND      | 2015            | BRS 284         | 48878       | VI             |
| BR-04           | BRS 360RR      | 20.91                    | <i>G. max</i> | Modern cultivar | Brazil         | ND      | ND              | ND              | 48867       | VI             |
| BR-05           | PI675666       | 19.87                    | <i>G. max</i> | Modern cultivar | Brazil         | ND      | 2015            | BRS Sambai ba   | 48818       | VII            |
| BR-06           | PI675660       | 20.07                    | <i>G. max</i> | Modern cultivar | Brazil         | ND      | 2016            | BRS 361         | 48905       | IX             |
| BR-07           | BRS Valiosa RR | 16.24                    | <i>G. max</i> | Modern cultivar | Brazil         | ND      | ND              | ND              | 48784       | VIII           |
| BR-08           | BRSGO 8660     | 14.50                    | <i>G. max</i> | Modern cultivar | Brazil         | ND      | ND              | ND              | 48840       | VIII           |
| BR-09           | BRSM G 850 GRR | 22.64                    | <i>G. max</i> | Modern cultivar | Brazil         | ND      | ND              | ND              | 48812       | VIII           |
| BR-10           | BRSMT Pintado  | 19.92                    | <i>G. max</i> | Modern cultivar | Brazil         | ND      | ND              | ND              | 48875       | VIII           |
| BR-11           | CD 201         | 23.09                    | <i>G. max</i> | Modern cultivar | Brazil         | ND      | ND              | ND              | 48881       | VI             |
| BR-12           | PI663948       | 21.46                    | <i>G. max</i> | Modern cultivar | Brazil         | ND      | 2011            | Embrapa 48      | 48893       | VII            |
| BR-13           | PI628838       | 19.20                    | <i>G. max</i> | Modern cultivar | Brazil         | ND      | 2001            | FT-Abyara BR-14 | 48861       | VII            |
| BR-14           | PI628808       | 23.22                    | <i>G. max</i> | Modern cultivar | Brazil         | ND      | 2001            | (Modelo )       | 48879       | VIII           |
| BR-15           | IAC 8          | 21.17                    | <i>G. max</i> | Modern cultivar | Brazil         | ND      | ND              | ND              | 48855       | VIII           |
| BR-16           | IAS 5          | 15.67                    | <i>G. max</i> | Modern cultivar | Brazil         | ND      | ND              | ND              | 48790       | VI             |
| BR-17           | MG/BR 46 NA    | 28.57                    | <i>G. max</i> | Modern cultivar | Brazil         | ND      | ND              | ND              | 48870       | VIII           |
| BR-18           | 5909 RG        | 19.82                    | <i>G. max</i> | Modern cultivar | Brazil         | ND      | ND              | ND              | 48824       | VI             |
| BR-20           | PI628879       | 17.16                    | <i>G. max</i> | Modern cultivar | Brazil         | ND      | 2001            | Parana          | 48856       | V              |
| BR-23           | PI628910       | 11.75                    | <i>G. max</i> | Modern cultivar | Brazil         | ND      | 2001            | BR-23           | 48673       | V              |

|        |                         |       |               |                    |         |                                      |      |                                      |       |      |
|--------|-------------------------|-------|---------------|--------------------|---------|--------------------------------------|------|--------------------------------------|-------|------|
| BR-24  | PI6289<br>11            | 10.17 | <i>G. max</i> | Modern<br>cultivar | Brazil  | ND                                   | 2001 | BR-24                                | 48740 | V    |
| BR-29  | BRSMT<br>Uirapur<br>u   | 10.29 | <i>G. max</i> | Modern<br>cultivar | Brazil  | ND                                   | ND   | ND<br>Embrap<br>a-20<br>(Doko<br>RC) | 48707 | IX   |
| BR-30  | PI6289<br>25            | 12.93 | <i>G. max</i> | Modern<br>cultivar | Brazil  | ND                                   | 2001 |                                      | 48781 | VIII |
| BR-32  | BRSGO<br>Chapad<br>ões  | 12.86 | <i>G. max</i> | Modern<br>cultivar | Brazil  | ND                                   | ND   | ND                                   | 48699 | IX   |
| DT2000 | PI6359<br>99            | 17.34 | <i>G. max</i> | Modern<br>cultivar | Vietnam | ND                                   | 2004 | DT<br>2000                           | 48249 | VI   |
| ESS    | PI5486<br>67            | 46.76 | <i>G. max</i> | Modern<br>cultivar | USA     | Virginia                             | 1972 | Essex                                | 48707 | V    |
| For    | PI5486<br>45            | 25.51 | <i>G. max</i> | Modern<br>cultivar | USA     | Illinois                             | 1989 | Pharao<br>h                          | 48455 | IV   |
| HN001  | PI5186<br>64            | 16.30 | <i>G. max</i> | Modern<br>cultivar | USA     | Virginia                             | 1988 | Hutche<br>son                        | 48187 | V    |
| HN002  | PI5484<br>02            | 17.36 | <i>G. max</i> | Old cultivar       | China   | Beijing                              | 1954 | Peking                               | 48324 | IV   |
| HN003  | PI8977<br>2             | 18.16 | <i>G. max</i> | Landrace           | China   | ND                                   | 1930 | 7193                                 | 48363 | IV   |
| HN004  | PI9076<br>3             | 16.07 | <i>G. max</i> | Landrace           | China   | Beijing                              | 1930 | 7570                                 | 48252 | IV   |
| HN005  | PI4041<br>66            | 18.37 | <i>G. max</i> | Landrace           | China   | ND                                   | 1975 | VIR<br>5222                          | 48349 | III  |
| HN006  | PI4077<br>88A           | 17.02 | <i>G. max</i> | Landrace           | Korea   | Kyonggi<br>Chungch<br>eongbuk-<br>do | 1975 | 8113                                 | 48324 | IV   |
| HN007  | PI4242<br>98            | 17.92 | <i>G. max</i> | Landrace           | Korea   |                                      | 1978 | KAS<br>300-10                        | 48355 | IV   |
| HN008  | PI4376<br>55            | 15.16 | <i>G. max</i> | Landrace           | China   | ND                                   | 1979 | VIR<br>5269                          | 48333 | III  |
| HN009  | PI4950<br>17C           | 17.35 | <i>G. max</i> | Landrace           | China   | Beijing                              | 1985 | Beijing<br>da qing<br>don            | 48309 | IV   |
| HN010  | PI4689<br>15            | 13.76 | <i>G. max</i> | Landrace           | China   | Liaoning                             | 1982 | ND                                   | 48327 | II   |
| HN011  | PI5073<br>54            | 14.79 | <i>G. max</i> | Landrace           | Japan   | Hokkaido                             | 1987 | 421                                  | 48244 | I    |
| HN012  | PI5673<br>05            | 14.77 | <i>G. max</i> | Landrace           | China   | Gansu                                | 1993 | Hei dou<br>zi                        | 48382 | IV   |
| HN013  | S05-<br>11482<br>PI4376 | 17.39 | <i>G. max</i> | Modern<br>cultivar | USA     | ND                                   | ND   | ND<br>VIR                            | 48168 | V    |
| HN015  | 54                      | 17.87 | <i>G. max</i> | Landrace           | China   | ND                                   | 1980 | 5268<br>Huang<br>huai                | 48420 | III  |
| HN016B | PI5673<br>87            | 13.49 | <i>G. max</i> | Landrace           | China   | Shanxi                               | 1993 | dou<br>VIR                           | 48312 | IV   |
| HN017B | PI4377<br>25            | 13.56 | <i>G. max</i> | Landrace           | China   | ND                                   | 1980 | 5430                                 | 48278 | IV   |
| HN018  | PI4376<br>90            | 15.96 | <i>G. max</i> | Landrace           | China   | ND                                   | 1980 | VIR<br>5283                          | 48308 | III  |
| HN019  | PI5484<br>02-2          | 18.08 | <i>G. max</i> | Old cultivar       | China   | Beijing                              | 1954 | Peking                               | 48382 | IV   |
| HN021  | PI2093<br>32            | 17.39 | <i>G. max</i> | Landrace           | Japan   | Hokkaido                             | 1953 | No.4                                 | 48392 | IV   |
| HN022  | PI4041<br>98B           | 16.48 | <i>G. max</i> | Landrace           | China   | ND                                   | 1975 | VIR<br>5518                          | 48411 | IV   |
| HN023  | PI4246<br>08A           | 13.89 | <i>G. max</i> | Landrace           | Korea   | Kyongsa<br>ng Puk                    | 1978 | KAS<br>681-21                        | 48193 | IV   |

|       |               |       |                |                    |       |                           |      |                                                      |       |     |
|-------|---------------|-------|----------------|--------------------|-------|---------------------------|------|------------------------------------------------------|-------|-----|
| HN024 | PI5483<br>16  | 19.43 | <i>G. max</i>  | Old cultivar       | China | Zhejiang                  | 1947 | Cloud                                                | 48401 | III |
| HN025 | PI5675<br>16C | 14.78 | <i>G. max</i>  | Landrace           | China | Shandong                  | 1993 | Ba yue<br>zha                                        | 48400 | IV  |
| HN026 | PI6126<br>11  | 16.58 | <i>G. max</i>  | Landrace           | Korea | ND                        | 1998 | Browning<br>Igun                                     | 48362 | III |
| HN027 | S10-<br>11227 | 18.55 | <i>G. max</i>  | Modern<br>cultivar | USA   | ND                        | ND   | ND                                                   | 48233 | V   |
| HN028 | PI5722<br>39  | 13.46 | <i>G. max</i>  | Modern<br>cultivar | USA   | North<br>Carolina         | 1993 | Hollada<br>y                                         | 48076 | V   |
| HN029 | IA3023        | 13.53 | <i>G. max</i>  | Modern<br>cultivar | USA   | ND                        | ND   | ND                                                   | 48131 | IV  |
| HN030 | PI5981<br>24  | 13.53 | <i>G. max</i>  | Modern<br>cultivar | USA   | Missouri                  | 1997 | Maveric<br>k                                         | 48173 | III |
| HN031 | PI7969<br>1-4 | 13.54 | <i>G. max</i>  | Landrace           | China | Heilongji<br>ang          | 1929 | ND<br>Kiio                                           | 48281 | III |
| HN032 | PI8600<br>6   | 13.53 | <i>G. max</i>  | Landrace           | Japan | Hokkaido                  | 1930 | Shokuz<br>u                                          | 48359 | III |
| HN033 | PI8761<br>7   | 13.54 | <i>G. max</i>  | Landrace           | Korea | Hamkys<br>ongpukto        | 1930 | Miyong<br>aikon                                      | 48202 | III |
| HN034 | PI8763<br>1-1 | 13.46 | <i>G. max</i>  | Landrace           | Japan | Saitama                   | 1930 | Kindaiz<br>u                                         | 48251 | III |
| HN035 | PI1961<br>75  | 13.54 | <i>G. max</i>  | Landrace           | Korea | South                     | 1947 | ND<br>Hanayc<br>me                                   | 48230 | V   |
| HN036 | PI2004<br>71  | 14.29 | <i>G. max</i>  | Landrace           | Japan | Shikoku                   | 1952 | Ibaragi<br>No. 1                                     | 48279 | III |
| HN037 | PI2005<br>08  | 13.37 | <i>G. max</i>  | Landrace           | Japan | Shikoku                   | 1952 | Natsu<br>Daizu<br>White<br>Hilum<br>Iwata<br>Variety | 48214 | I   |
| HN038 | PI2485<br>15  | 13.55 | <i>G. max</i>  | Landrace           | Japan | Honshu                    | 1958 | No. 2                                                | 48409 | IV  |
| HN039 | PI3661<br>21  | 13.53 | <i>G. soja</i> | Wild<br>soybean    | Japan | Aizutaka<br>da            | 1971 | ND                                                   | 48611 | IV  |
| HN040 | PI3787<br>02  | 13.48 | <i>G. soja</i> | Wild<br>soybean    | Japan | Iwate                     | 1973 | ND                                                   | 48502 | IV  |
| HN041 | PI3985<br>93  | 13.28 | <i>G. max</i>  | Landrace           | Korea | Chungch<br>eongbuk-<br>do | 1974 | KAS<br>390-4                                         | 48300 | V   |
| HN042 | PI3985<br>95  | 13.34 | <i>G. max</i>  | Landrace           | Korea | Chungch<br>eongbuk-<br>do | 1974 | KAS<br>390-5                                         | 48226 | V   |
| HN043 | PI3986<br>10  | 13.32 | <i>G. max</i>  | Landrace           | Korea | Chungch<br>eongbuk-<br>do | 1974 | KAS<br>390-8                                         | 48246 | V   |
| HN044 | PI3986<br>14  | 13.28 | <i>G. max</i>  | Landrace           | Korea | Chungch<br>eongbuk-<br>do | 1974 | KAS<br>390-9                                         | 48223 | V   |
| HN045 | PI4071<br>62  | 13.50 | <i>G. soja</i> | Wild<br>soybean    | Korea | Kyonggi                   | 1972 | K1-D                                                 | 48518 | IV  |
| HN046 | PI4071<br>84  | 13.53 | <i>G. soja</i> | Wild<br>soybean    | Korea | Hwaseon<br>g Gun          | 1972 | K29                                                  | 48529 | IV  |
| HN047 | PI4077<br>29  | 13.52 | <i>G. max</i>  | Landrace           | China | Beijing                   | 1974 | ND                                                   | 48275 | IV  |
| HN048 | PI4079<br>65  | 13.56 | <i>G. max</i>  | Landrace           | Korea | Cholla<br>Nam             | 1975 | KAERI<br>504-4                                       | 48310 | V   |
| HN049 | PI4081<br>05A | 13.30 | <i>G. max</i>  | Landrace           | Korea | Kyongsa<br>ng Puk         | 1975 | KAS<br>633-19                                        | 48249 | IV  |

|       |               |       |                |                    |                  |                   |      |                    |       |     |
|-------|---------------|-------|----------------|--------------------|------------------|-------------------|------|--------------------|-------|-----|
|       | PI4169        |       |                |                    |                  |                   |      | Houjak<br>u        |       |     |
| HN050 | 37            | 15.28 | <i>G. max</i>  | Landrace           | Japan            | Kanto             | 1974 | Kuwazu             | 48219 | VI  |
| HN051 | PI4240<br>78  | 13.56 | <i>G. max</i>  | Landrace           | Korea            | Kangwon           | 1976 | 74077              | 48377 | III |
| HN052 | PI4240<br>79  | 13.52 | <i>G. soja</i> | Wild<br>soybean    | Korea            | Jung-<br>sun Gun  | 1974 | 74079              | 48548 | IV  |
| HN053 | PI4240<br>88  | 13.76 | <i>G. soja</i> | Wild<br>soybean    | Korea            | Je-chun<br>Gun    | 1976 | 74088              | 48560 | IV  |
| HN054 | PI4371<br>69B | 15.10 | <i>G. max</i>  | Landrace           | Russia           | Krasnod<br>ar     | 1979 | VNIISC-<br>4       | 48246 | II  |
| HN055 | PI4376<br>79  | 13.30 | <i>G. max</i>  | Landrace           | China            | ND                | 1979 | VIR<br>4895        | 48301 | IV  |
| HN056 | PI4378<br>63A | 13.52 | <i>G. max</i>  | Landrace           | China            | Northeas<br>t     | 1979 | DV-<br>2841        | 48219 | II  |
| HN057 | PI4382<br>58  | 13.57 | <i>G. max</i>  | Landrace           | China            | Northeas<br>t     | 1979 | VIR<br>4714        | 48305 | II  |
| HN058 | PI4585<br>15  | 13.67 | <i>G. max</i>  | Landrace           | China            | Shandon<br>g      | 1981 | Tie<br>Zhugan      | 48443 | IV  |
| HN059 | PI4649<br>20B | 13.71 | <i>G. max</i>  | Landrace           | China            | Liaoning          | 1982 | Jin Dou<br>33      | 48228 | III |
| HN060 | PI4673<br>12  | 13.53 | <i>G. max</i>  | Landrace           | China            | Jilin             | 1982 | Cha-mo-<br>shi-dou | 48297 | II  |
| HN061 | PI4719<br>38  | 13.51 | <i>G. max</i>  | Landrace           | Nepal            | ND                | 1982 | 197                | 48219 | V   |
| HN062 | PI4757<br>83B | 13.45 | <i>G. max</i>  | Landrace           | China            | ND                | 1982 | Tsing 2            | 48154 | III |
| HN063 | PI4834<br>63  | 13.40 | <i>G. soja</i> | Wild<br>soybean    | China            | Shanxi            | 1984 | ND                 | 48510 | III |
| HN064 | PI5187<br>51  | 13.64 | <i>G. max</i>  | Modern<br>cultivar | Former<br>Serbia | ND                | 1988 | NS-20              | 48167 | II  |
| HN065 | PI5420<br>44  | 15.48 | <i>G. max</i>  | Modern<br>cultivar | USA              | Illinois          | 1990 | Kunitz             | 48164 | III |
| HN066 | PI5478<br>62  | 13.49 | <i>G. max</i>  | Modern<br>cultivar | USA              | Illinois          | 1989 | L83-<br>570        | 48170 | III |
| HN067 | PI5483<br>17  | 15.98 | <i>G. max</i>  | Old cultivar       | China            | Hebei             | 1954 | Columbi<br>a       | 48260 | III |
| HN068 | PI5483<br>49  | 13.50 | <i>G. max</i>  | Old cultivar       | Korea            | Phyeong<br>yang   | 1927 | Ilsoy              | 48221 | III |
| HN069 | PI5484<br>15  | 13.42 | <i>G. max</i>  | Old cultivar       | China            | Zhejiang          | 1907 | Sooty              | 48248 | IV  |
| HN070 | PI5485<br>11  | 13.44 | <i>G. max</i>  | Modern<br>cultivar | USA              | Indiana           | 1978 | Beeson<br>80       | 48146 | II  |
| HN071 | PI5486<br>57  | 13.70 | <i>G. max</i>  | Modern<br>cultivar | USA              | North<br>Carolina | 1953 | Jackso<br>n        | 48208 | VII |
| HN072 | PI5490<br>31  | 13.71 | <i>G. max</i>  | Landrace           | China            | Beijing           | 1990 | ND                 | 48282 | III |
| HN073 | PI5525<br>38  | 13.73 | <i>G. max</i>  | Modern<br>cultivar | USA              | Nebrask<br>a      | 1991 | Dunbar<br>Pei xian | 48160 | III |
| HN074 | PI5612<br>71  | 13.46 | <i>G. max</i>  | Landrace           | China            | Zhejiang          | 1992 | da<br>quing<br>dou | 48199 | V   |
| HN075 | PI5672<br>30  | 13.83 | <i>G. max</i>  | Landrace           | China            | Shanxi            | 1993 | WJK-<br>PRC-23     | 48316 | V   |
| HN076 | PI5673<br>36B | 13.79 | <i>G. max</i>  | Landrace           | China            | Gansu             | 1993 | Lao hei<br>dou     | 48335 | IV  |
| HN077 | PI5673<br>43  | 13.80 | <i>G. max</i>  | Landrace           | China            | Gansu             | 1993 | Ma<br>huang<br>dou | 48337 | V   |

|       |               |       |               |                    |         |                   |      |                                            |       |      |
|-------|---------------|-------|---------------|--------------------|---------|-------------------|------|--------------------------------------------|-------|------|
| HN078 | PI5673<br>54  | 13.83 | <i>G. max</i> | Landrace           | China   | Gansu             | 1993 | You<br>huang<br>dou<br>Du jia<br>qiao      | 48267 | IV   |
| HN079 | PI5673<br>57  | 13.78 | <i>G. max</i> | Landrace           | China   | Ningxia           | 1993 | huang<br>dou<br>Da ke                      | 48249 | III  |
| HN080 | PI5673<br>83  | 13.81 | <i>G. max</i> | Landrace           | China   | Shanxi            | 1993 | huang<br>dou                               | 48299 | V    |
| HN081 | PI5675<br>19  | 13.58 | <i>G. max</i> | Landrace           | China   | Shandon<br>g      | 1993 | Bai hua<br>chi                             | 48268 | III  |
| HN082 | PI5676<br>11  | 13.56 | <i>G. max</i> | Landrace           | China   | Henan             | 1993 | Ba yue<br>zha                              | 48241 | IV   |
| HN083 | PI5676<br>51  | 13.53 | <i>G. max</i> | Landrace           | China   | Henan             | 1993 | Shang<br>cai er<br>cao<br>PIng<br>ding shi | 48196 | IV   |
| HN084 | PI5676<br>90  | 13.58 | <i>G. max</i> | Landrace           | China   | Anhui             | 1993 | Fuyang<br>7                                | 48272 | III  |
| HN085 | PI5677<br>19  | 13.59 | <i>G. max</i> | Landrace           | China   | Anhui             | 1993 | Fuyang<br>43                               | 48255 | IV   |
| HN086 | PI5677<br>31  | 13.57 | <i>G. max</i> | Landrace           | China   | Anhui             | 1993 | Fu yang<br>56                              | 48238 | III  |
| HN087 | PI5915<br>39  | 13.48 | <i>G. max</i> | Modern<br>cultivar | USA     | Illinois          | 1995 | L91-<br>8558                               | 48162 | III  |
| HN088 | PI5932<br>58  | 13.59 | <i>G. max</i> | Modern<br>cultivar | USA     | Illinois          | 1996 | Macon                                      | 48171 | III  |
| HN089 | PI5940<br>12  | 13.55 | <i>G. max</i> | Landrace           | Korea   | South             | 1995 | Heuksa<br>tangdu<br>Bian zi                | 48249 | V    |
| HN090 | PI5945<br>12A | 16.00 | <i>G. max</i> | Landrace           | China   | Sichuan           | 1996 | jiang se<br>dou                            | 48234 | VII  |
| HN091 | PI5945<br>99  | 13.55 | <i>G. max</i> | Landrace           | China   | Hunan             | 1996 | Chang<br>de chun<br>hei dou                | 48368 | IV   |
| HN092 | PI5973<br>87  | 13.52 | <i>G. max</i> | Modern<br>cultivar | USA     | Illinois          | 1997 | Pana<br>GL<br>2622                         | 48544 | III  |
| HN093 | PI6031<br>54  | 13.64 | <i>G. max</i> | Landrace           | Korea   | ND                | 1997 | /96<br>GL<br>2683                          | 48244 | V    |
| HN094 | PI6031<br>70  | 13.57 | <i>G. max</i> | Landrace           | Korea   | ND                | 1997 | /96<br>GL<br>2688                          | 48152 | IV   |
| HN095 | PI6031<br>75  | 16.18 | <i>G. max</i> | Landrace           | Korea   | ND                | 1997 | /96                                        | 48256 | IV   |
| HN096 | PI6031<br>76A | 13.62 | <i>G. max</i> | Landrace           | Korea   | ND                | 1997 | ND                                         | 48197 | IV   |
| HN097 | PI6034<br>97  | 13.56 | <i>G. max</i> | Landrace           | China   | Shandon<br>g      | 1998 | Hua<br>dou                                 | 48186 | III  |
| HN098 | PI6058<br>69A | 13.41 | <i>G. max</i> | Landrace           | Vietnam | Laocai            | 1998 | Sample<br>140                              | 48206 | V    |
| HN099 | PI6397<br>40  | 13.73 | <i>G. max</i> | Modern<br>cultivar | USA     | Illinois          | 2005 | LD00-<br>3309                              | 48104 | IV   |
| HN100 | PI6470<br>86  | 13.63 | <i>G. max</i> | Modern<br>cultivar | USA     | North<br>Carolina | 2007 | N8001                                      | 48126 | VIII |
| HN101 | PI6585<br>19  | 13.61 | <i>G. max</i> | Modern<br>cultivar | USA     | Illinois          | 2009 | LD00-<br>2817P                             | 48174 | IV   |
| HN104 | FC3172<br>1   | 14.92 | <i>G. max</i> | Landrace           | ND      | ND                | ND   | ND                                         | 48264 | VI   |

|         |               |       |               |          |         |               |      |                              |       |     |
|---------|---------------|-------|---------------|----------|---------|---------------|------|------------------------------|-------|-----|
| HN105   | PI4384<br>71  | 14.94 | <i>G. max</i> | Landrace | Sweden  | Ostergötlands | 1947 | Fiskeby III                  | 48254 | 00  |
| HN106   | PI4170<br>91  | 15.41 | <i>G. max</i> | Landrace | Japan   | Kanto         | 1974 | Kuro mame Kawanagare (Iwate) | 48350 | II  |
| HN107   | PI4170<br>15  | 14.52 | <i>G. max</i> | Landrace | Japan   | Iwate         | 1974 |                              | 48269 | III |
| HN108   | PI2293<br>43  | 14.18 | <i>G. max</i> | Landrace | Japan   | ND            | 1955 | ND                           | 48273 | IV  |
| HNEX-01 | FC4007<br>B   | 20.05 | <i>G. max</i> | Landrace | ND      | ND            | 1924 | ND                           | 48573 | III |
| HNEX-02 | PI6850<br>8   | 25.77 | <i>G. max</i> | Landrace | China   | ND            | 1926 | 292                          | 48592 | II  |
| HNEX-04 | PI6860<br>0   | 23.59 | <i>G. max</i> | Landrace | China   | Jilin         | 1926 | 382 Sousei Kuro Sakigake     | 48556 | II  |
| HNEX-06 | PI8004<br>71  | 24.52 | <i>G. max</i> | Landrace | Japan   | Tokyo         | 1929 | Rasuto San                   | 48591 | II  |
| HNEX-07 | PI8605<br>0   | 21.93 | <i>G. max</i> | Landrace | Japan   | Hokkaido      | 1930 |                              | 48582 | II  |
| HNEX-08 | PI9056<br>6-1 | 24.19 | <i>G. max</i> | Landrace | China   | Liaoning      | 1930 | 6476 Excellent, Grade No. 1  | 48619 | III |
| HNEX-09 | PI9173<br>0-1 | 22.75 | <i>G. max</i> | Landrace | China   | Jilin         | 1931 |                              | 48681 | III |
| HNEX-10 | PI1899<br>30  | 22.81 | <i>G. max</i> | Landrace | France  | ND            | 1950 | Mandchurische Manchin        | 48663 | II  |
| HNEX-11 | PI2273<br>28  | 22.11 | <i>G. max</i> | Landrace | Japan   | Hokkaido      | 1955 |                              | 48638 | III |
| HNEX-13 | PI2536<br>65D | 23.16 | <i>G. max</i> | Landrace | China   | ND            | ND   | ND                           | 48828 | III |
| HNEX-14 | PI2833<br>31  | 22.09 | <i>G. max</i> | Landrace | Morocco | ND            | 1962 | No. 380 Iregi                | 48751 | III |
| HNEX-16 | PI2975<br>15  | 19.83 | <i>G. max</i> | Landrace | Hungary | ND            | 1964 | GM/1                         | 48555 | II  |
| HNEX-17 | PI2975<br>44  | 21.75 | <i>G. max</i> | Landrace | Russia  | Primorye      | 1964 | ND                           | 48597 | II  |
| HNEX-18 | PI3610<br>64  | 21.59 | <i>G. max</i> | Landrace | Romania | ND            | 1971 | F. 56-51                     | 48673 | II  |
| HNEX-19 | PI3610<br>66A | 21.53 | <i>G. max</i> | Landrace | Romania | ND            | 1971 | F. 56-17 VIR                 | 48581 | I   |
| HNEX-20 | PI3700<br>59  | 22.82 | <i>G. max</i> | Landrace | Russia  | ND            | 1972 | 5622                         | 48638 | I   |
| HNEX-21 | PI3844<br>69A | 26.29 | <i>G. max</i> | Landrace | Russia  | Krasnodar     | 1974 | Kubanskaja 33                | 48663 | I   |
| HNEX-23 | PI3915<br>94  | 23.32 | <i>G. max</i> | Landrace | China   | Jilin         | 1974 | Jilin No. 8                  | 48531 | II  |
| HNEX-24 | PI4041<br>57  | 27.11 | <i>G. max</i> | Landrace | Russia  | Primorye      | 1975 | Primorskaja 494              | 48581 | I   |
| HNEX-25 | PI4077<br>10  | 19.77 | <i>G. max</i> | Landrace | China   | Heilongjiang  | 1975 | Foo sun No. 1                | 48564 | I   |
| HNEX-26 | PI4077<br>20  | 20.59 | <i>G. max</i> | Landrace | China   | Jilin         | 1975 | Kao chien tao                | 48503 | II  |
| HNEX-27 | PI4241<br>59B | 22.41 | <i>G. max</i> | Landrace | Korea   | Kyongsang Puk | 1978 | KAS 643-8                    | 48447 | IV  |
| HNEX-28 | PI4241<br>95B | 24.33 | <i>G. max</i> | Landrace | Hungary | ND            | 1978 | ISZ-3                        | 48499 | I   |
| HNEX-29 | PI4270<br>99  | 21.94 | <i>G. max</i> | Landrace | China   | Jilin         | 1978 | Jilin No. 3                  | 48524 | I   |
| HNEX-30 | PI4366<br>82  | 25.06 | <i>G. max</i> | Landrace | China   | Jilin         | 1979 | Ji Lin 15                    | 48660 | I   |
| HNEX-32 | PI4378<br>51A | 26.69 | <i>G. max</i> | Landrace | China   | Northeast     | 1979 | DV-2369/2                    | 48658 | I   |
| HNEX-33 | PI4381<br>51  | 22.55 | <i>G. max</i> | Landrace | China   | Northeast     | 1980 | VIR 2921                     | 48543 | I   |

|         |               |       |               |          |           |                   |      |                             |       |     |
|---------|---------------|-------|---------------|----------|-----------|-------------------|------|-----------------------------|-------|-----|
| HNEX-34 | PI4382<br>06  | 20.14 | <i>G. max</i> | Landrace | China     | Northeast         | 1979 | VIR<br>4492                 | 48632 | I   |
| HNEX-35 | PI4458<br>30  | 20.22 | <i>G. max</i> | Landrace | Romania   | ND                | 1980 | Flora                       | 48530 | I   |
| HNEX-36 | PI4458<br>37  | 18.98 | <i>G. max</i> | Landrace | Romania   | ND                | 1980 | Violeta<br>Kai Yu           | 48581 | I   |
| HNEX-37 | PI4585<br>11  | 20.16 | <i>G. max</i> | Landrace | China     | Liaoning          | 1981 | No. 3<br>Hong<br>Kong       | 48557 | II  |
| HNEX-38 | PI4683<br>77  | 17.62 | <i>G. max</i> | Landrace | China     | Heilongjiang      | 1982 | #3                          | 48514 | 00  |
| HNEX-39 | PI5613<br>19A | 27.00 | <i>G. max</i> | Landrace | China     | Beijing           | 1992 | Hui nan<br>zi hua<br>he jia | 48587 | II  |
| HNEX-40 | PI5613<br>77  | 25.74 | <i>G. max</i> | Landrace | Japan     | Natto             | 1992 | Chohak<br>uzan              | 48642 | II  |
| HNSM-01 | PI5671<br>39B | 23.28 | <i>G. max</i> | Landrace | Indonesia | Bali              | 1993 | MARIF<br>2810               | 48634 | ND  |
| HNSM-02 | PI4079<br>85  | 26.59 | <i>G. max</i> | Landrace | Korea     | Cholla            | 1975 | KAS<br>542-4                | 48635 | IV  |
| HNSM-03 | PI4083<br>19C | 21.03 | <i>G. max</i> | Landrace | Korea     | Kyongsan          | 1975 | KAS<br>634-4                | 48645 | IV  |
| HNSM-04 | PI1574<br>32  | 23.83 | <i>G. max</i> | Landrace | Korea     | South             | 1947 | Ic san                      | 48612 | V   |
| HNSM-05 | PI2005<br>43  | 22.23 | <i>G. max</i> | Landrace | Japan     | Shikoku           | 1952 | Tamani<br>shiki<br>Zairai   | 48538 | VII |
| HNSM-06 | PI2005<br>53  | 24.66 | <i>G. max</i> | Landrace | Japan     | Shikoku           | 1952 | Kuro<br>Daizu               | 48702 | VI  |
| HNSM-07 | PI3986<br>66  | 22.79 | <i>G. max</i> | Landrace | Korea     | Chungcheongbuk-do | 1972 | KAS<br>391-4                | 48553 | IV  |
| HNSM-08 | PI3987<br>75  | 22.54 | <i>G. max</i> | Landrace | Korea     | Chungcheongbuk-do | 1972 | KAS<br>352-4                | 48543 | IV  |
| HNSM-09 | PI3987<br>91  | 24.81 | <i>G. max</i> | Landrace | Korea     | Chungcheongnam-do | 1972 | KAS<br>353-7                | 48656 | IV  |
| HNSM-10 | PI3989<br>46  | 27.44 | <i>G. max</i> | Landrace | Korea     | Cholla<br>Nam     | 1973 | KLS<br>607-3                | 48525 | IV  |
| HNSM-11 | PI3990<br>04  | 24.68 | <i>G. max</i> | Landrace | Korea     | Kyongsang Puk     | 1967 | KLS<br>733-1                | 48553 | IV  |
| HNSM-12 | PI4242<br>37A | 22.98 | <i>G. max</i> | Landrace | Korea     | Kyonggi           | 1978 | ND                          | 48596 | IV  |
| HNSM-13 | PI4242<br>37B | 24.01 | <i>G. max</i> | Landrace | Korea     | Kyonggi           | 1978 | ND                          | 48595 | VI  |
| HNSM-14 | PI4244<br>77  | 24.66 | <i>G. max</i> | Landrace | Korea     | Kyongsan          | 1978 | KAS<br>603-5                | 48533 | IV  |
| HNSM-15 | PI3984<br>40  | 22.16 | <i>G. max</i> | Landrace | Korea     | Kangwon           | 1972 | KAS<br>205-11               | 48545 | IV  |
| HNSM-16 | PI3990<br>79  | 24.02 | <i>G. max</i> | Landrace | Korea     | Chungcheongbuk-do | 1967 | ND                          | 48596 | IV  |
| HNSM-17 | PI4080<br>29  | 26.30 | <i>G. max</i> | Landrace | Korea     | Cholla<br>Nam     | 1975 | KAS<br>570-1                | 48617 | IV  |
| HNSM-18 | PI4080<br>97  | 22.02 | <i>G. max</i> | Landrace | Korea     | Kyongsang Puk     | 1975 | KAS<br>633-11               | 48582 | IV  |
| HNSM-19 | PI4081<br>11  | 24.03 | <i>G. max</i> | Landrace | Korea     | Kyongsang Puk     | 1975 | ND                          | 48682 | IV  |
| HNSM-20 | PI4081<br>32  | 20.91 | <i>G. max</i> | Landrace | Korea     | Kyongsang Puk     | 1975 | KAS<br>640-1                | 48541 | IV  |
| HNSM-21 | PI2734<br>83D | 21.51 | <i>G. max</i> | Landrace | Korea     | Seoul             | 1961 | ND                          | 48627 | IV  |
| HNSM-22 | V71-<br>370   | 23.89 | <i>G. max</i> | Landrace | ND        | ND                | ND   | ND                          | 48672 | IV  |

|          |               |       |                     |                    |        |                                |      |                                                                |       |     |
|----------|---------------|-------|---------------------|--------------------|--------|--------------------------------|------|----------------------------------------------------------------|-------|-----|
| HNSM-23  | PI4271<br>06  | 23.52 | <i>G. max</i>       | Landrace           | China  | Jilin                          | 1976 | Kung<br>chiao<br>6602-3<br>Little<br>Golden<br>Yellow<br>No. 1 | 48710 | II  |
| HNSM-24  | PI4271<br>05B | 24.12 | <i>G. max</i>       | Landrace           | China  | Jilin                          | ND   |                                                                | 48575 | II  |
| HNSM-25  | PI5254<br>53  | 21.34 | <i>G. max</i>       | Modern<br>cultivar | USA    | Iowa                           | 1988 | Conrad                                                         | 48538 | II  |
| HNSM-26  | PI5486<br>16  | 24.94 | <i>G. max</i>       | Modern<br>cultivar | USA    | Iowa                           | 1978 | Sloan                                                          | 48644 | II  |
| HNSM-27  | PI4070<br>76  | 22.98 | <i>G. soja</i>      | Wild<br>soybean    | Japan  | Aiti                           | 1972 | RB<br>1072                                                     | 48807 | ND  |
| HNSM-28  | PI5075<br>82  | 24.52 | <i>G. soja</i>      | Wild<br>soybean    | Japan  | Aomori                         | 1983 | NIAR<br>020001                                                 | 48902 | ND  |
| HNSM-29  | PI5075<br>97  | 24.29 | <i>G. soja</i>      | Wild<br>soybean    | Japan  | Niigata                        | 1984 | NIAR<br>030005                                                 | 48883 | ND  |
| HNSM-30  | PI5076<br>21  | 23.69 | <i>G. soja</i>      | Wild<br>soybean    | Japan  | Nagano                         | 1983 | NIAR<br>040019                                                 | 48930 | ND  |
| HNSM-31  | PI5077<br>94  | 22.40 | <i>G. soja</i>      | Wild<br>soybean    | Russia | Primorye                       | 1986 | VIR<br>9037                                                    | 48967 | ND  |
| HNSM-32  | PI5625<br>39  | 24.60 | <i>G. soja</i>      | Wild<br>soybean    | Korea  | Kyonggi<br>Chungch<br>eongbuk- | 1986 | KA16                                                           | 48904 | ND  |
| HNSM-33  | PI5625<br>47  | 22.64 | <i>G. soja</i>      | Wild<br>soybean    | Korea  | do                             | 1986 | KC1                                                            | 48899 | ND  |
| HNSM-34A | Unknow<br>n   | 24.11 | <i>Unkno<br/>wn</i> | Unknown            | ND     | ND                             | ND   | ND                                                             | 48604 | ND  |
| HNSM-35a | Unknow<br>n   | 23.39 | <i>Unkno<br/>wn</i> | Unknown            | ND     | ND                             | ND   | ND                                                             | 48608 | ND  |
| HNy-01   | R11-<br>7999  | 24.15 | <i>G. max</i>       | Modern<br>cultivar | USA    | ND                             | ND   | ND                                                             | 48099 | V   |
| HNy-02   | R10-<br>5828  | 23.83 | <i>G. max</i>       | Modern<br>cultivar | USA    | ND                             | ND   | ND                                                             | 48072 | V   |
| HNy-03   | R02-<br>6268  | 25.04 | <i>G. max</i>       | Modern<br>cultivar | USA    | ND                             | ND   | ND                                                             | 48198 | V   |
| HNy-04   | R08-<br>1450  | 24.01 | <i>G. max</i>       | Modern<br>cultivar | USA    | ND                             | ND   | ND                                                             | 48163 | V   |
| HNy-05   | R05-<br>655   | 24.26 | <i>G. max</i>       | Modern<br>cultivar | USA    | ND                             | ND   | ND                                                             | 48244 | V   |
| HNy-06   | R07-<br>2000  | 23.01 | <i>G. max</i>       | Modern<br>cultivar | USA    | ND                             | ND   | ND                                                             | 48144 | V   |
| HNy-07   | PI5674<br>25B | 23.88 | <i>G. max</i>       | Landrace           | China  | Shanxi                         | 1993 | Bai hua<br>huang<br>dou                                        | 48291 | III |
| HNy-08   | PI5974<br>73  | 24.55 | <i>G. max</i>       | Landrace           | China  | Hubei                          | 1997 | 82-24                                                          | 48215 | V   |
| HNy-09   | PI5676<br>71A | 24.38 | <i>G. max</i>       | Landrace           | China  | Henan                          | 1993 | Yan ling<br>xiao li<br>huang                                   | 48244 | III |
| HNy-10   | PI5676<br>14B | 22.14 | <i>G. max</i>       | Landrace           | China  | Henan                          | 1993 | Chang<br>yuan<br>xiao tian<br>e dan                            | 48222 | IV  |

|       |            |       |                |                 |       |          |      |          |       |     |
|-------|------------|-------|----------------|-----------------|-------|----------|------|----------|-------|-----|
| HN-11 | SS98-3403  | 21.85 | <i>G. max</i>  | Modern cultivar | USA   | ND       | ND   | ND       | 48119 | IV  |
| HN-12 | LG11-8737  | 20.08 | <i>G. max</i>  | Modern cultivar | USA   | ND       | ND   | ND       | 48235 | IV  |
| HN-13 | LG11-8744  | 25.06 | <i>G. max</i>  | Modern cultivar | USA   | ND       | ND   | ND       | 48214 | IV  |
| HN-14 | PI483464 A | 24.64 | <i>G. soja</i> | Wild soybean    | China | Ningxia  | 1980 | ND       | 48477 | III |
| HN-15 | S12-1879   | 23.45 | <i>G. max</i>  | Modern cultivar | USA   | ND       | ND   | ND       | 48121 | IV  |
| HN-16 | S12-2894   | 22.19 | <i>G. max</i>  | Modern cultivar | USA   | ND       | ND   | ND       | 48144 | IV  |
| HN-17 | S09-9943   | 22.08 | <i>G. max</i>  | Modern cultivar | USA   | ND       | ND   | ND       | 48170 | IV  |
| HN-18 | S12-2994M  | 26.34 | <i>G. max</i>  | Modern cultivar | USA   | ND       | ND   | ND       | 48134 | IV  |
| HN-19 | S12-3187   | 20.11 | <i>G. max</i>  | Modern cultivar | USA   | ND       | ND   | ND       | 48114 | IV  |
| HN-20 | S11-17025  | 23.46 | <i>G. max</i>  | Modern cultivar | USA   | ND       | ND   | ND       | 48098 | IV  |
| HN-21 | S11-16195  | 24.86 | <i>G. max</i>  | Modern cultivar | USA   | ND       | ND   | ND       | 48115 | IV  |
| HN-22 | S08-17361  | 23.49 | <i>G. max</i>  | Modern cultivar | USA   | ND       | ND   | ND       | 48188 | IV  |
| HN-23 | S09-13185  | 26.27 | <i>G. max</i>  | Modern cultivar | USA   | ND       | ND   | ND       | 48127 | IV  |
| HN-24 | OSAGE      | 19.11 | <i>G. max</i>  | Modern cultivar | USA   | ND       | ND   | ND       | 48100 | ND  |
| HN-25 | ANAND      | 21.72 | <i>G. max</i>  | Modern cultivar | USA   | Missouri | 2000 | Anand    | 48073 | ND  |
| HN-26 | STODDARD   | 27.08 | <i>G. max</i>  | Modern cultivar | USA   | ND       | ND   | ND       | 48150 | ND  |
| HN-27 | JTN 5503   | 20.69 | <i>G. max</i>  | Modern cultivar | USA   | ND       | ND   | ND       | 48111 | ND  |
| HN-28 | 560 IT     | 23.27 | <i>G. max</i>  | Modern cultivar | USA   | ND       | ND   | ND       | 48188 | ND  |
| HN-29 | S07-5049   | 22.65 | <i>G. max</i>  | Modern cultivar | USA   | ND       | ND   | ND       | 48103 | IV  |
| HN-30 | S07-5117   | 23.60 | <i>G. max</i>  | Modern cultivar | USA   | ND       | ND   | ND       | 48211 | IV  |
| HN-31 | S07-6699   | 23.52 | <i>G. max</i>  | Modern cultivar | USA   | ND       | ND   | ND       | 48201 | IV  |
| HN-32 | PI654356   | 21.16 | <i>G. max</i>  | Modern cultivar | USA   | Missouri | 2008 | S99-2281 | 48113 | IV  |
| HN-33 | PI595645   | 24.39 | <i>G. max</i>  | Modern cultivar | USA   | Georgia  | 1996 | Benning  | 48183 | VII |
| HN-38 | LG04-5196  | 26.60 | <i>G. max</i>  | Modern cultivar | USA   | ND       | ND   | ND       | 48188 | IV  |

|           |            |       |                |                 |         |                  |      |                                     |       |      |
|-----------|------------|-------|----------------|-----------------|---------|------------------|------|-------------------------------------|-------|------|
| HN-39     | LG04-6000  | 19.95 | <i>G. max</i>  | Modern cultivar | USA     | ND               | ND   | ND                                  | 48140 | IV   |
| HN-40     | U98-311442 | 23.03 | <i>G. max</i>  | Modern cultivar | USA     | ND               | ND   | ND                                  | 48160 | III  |
| HN-41     | PI606748   | 22.41 | <i>G. max</i>  | Modern cultivar | USA     | Illinois         | 1998 | Rend                                | 48256 | IV   |
| HN-42     | PI340042   | 21.07 | <i>G. max</i>  | Landrace        | Korea   | kyongsa n        | 1969 | ND                                  | 48228 | IV   |
| HN-43     | LD04-13265 | 25.12 | <i>G. max</i>  | Modern cultivar | USA     | ND               | ND   | ND                                  | 48219 | IV   |
| HN-44     | Woodruff   | 22.16 | <i>G. max</i>  | Modern cultivar | USA     | ND               | ND   | ND                                  | 48134 | VIII |
| HN-45     | PI553045   | 20.50 | <i>G. max</i>  | Modern cultivar | USA     | Georgia          | 1991 | Cook                                | 48198 | VIII |
| HN-46     | PI615694   | 23.89 | <i>G. max</i>  | Modern cultivar | USA     | North Carolina   | 2001 | N7001                               | 48201 | VII  |
| HN-47     | PI602597   | 21.93 | <i>G. max</i>  | Modern cultivar | USA     | Georgia          | 1988 | Boggs                               | 48116 | VI   |
| HN-48     | PI483460B  | 25.55 | <i>G. soja</i> | Wild soybean    | China   | Liaoning         | 1980 | ND                                  | 48577 | III  |
| HN-49     | Uram       | 20.91 | <i>G. max</i>  | Modern cultivar | Korea   | ND               | ND   | ND                                  | 48144 | ND   |
| HN-50     | PI468916   | 23.98 | <i>G. soja</i> | Wild soybean    | China   | Liaoning         | 1982 | ND                                  | 48615 | III  |
| HN-51     | PI548352   | 22.61 | <i>G. max</i>  | Old cultivar    | Korea   | Hamkys ong-pukto | 1951 | Jogun Mandarin                      | 48190 | III  |
| HN-52     | PI548379   | 25.02 | <i>G. max</i>  | Old cultivar    | China   | Heilongjiang     | 1956 | (Ottawa)                            | 48186 | 0    |
| HN-53     | PI360955A  | 22.55 | <i>G. max</i>  | Landrace        | Sweden  | Ostergotland     | 1970 | ND Viet. Donor No. 90 Italian Early | 48342 | 000  |
| HN-54     | PI653935   | 24.77 | <i>G. max</i>  | Landrace        | Vietnam | ND               | 2008 |                                     | 48243 | III  |
| HN-55     | PI248399   | 23.05 | <i>G. max</i>  | Landrace        | Serbia  | ND               | 1958 |                                     | 48228 | 0    |
| HN-56     | LG11-8690  | 21.84 | <i>G. max</i>  | Modern cultivar | USA     | ND               | ND   | ND                                  | 48183 | IV   |
| HN-57     | LG11-8706  | 23.68 | <i>G. max</i>  | Modern cultivar | USA     | ND               | ND   | ND                                  | 48317 | IV   |
| HN-58     | PI619083   | 21.77 | <i>G. max</i>  | Modern cultivar | Serbia  | ND               | 2001 | Danbaek Kong                        | 48082 | V    |
| HN-59     | PI543795   | 21.92 | <i>G. max</i>  | Modern cultivar | USA     | Missouri         | 1990 | Hartwig                             | 48131 | V    |
| PI342622A | PI342622A  | 12.32 | <i>G. soja</i> | Wild soybean    | Russia  | Primorye         | 1967 | ND                                  | 48676 | I    |
| PI378683  | PI378683   | 11.21 | <i>G. soja</i> | Wild soybean    | Japan   | Nonoichi         | ND   | ND                                  | 48862 | ND   |
| PI378684A | PI378684A  | 31.54 | <i>G. soja</i> | Wild soybean    | Japan   | Saitama          | 1973 | ND                                  | 48871 | ND   |
| PI378684B | PI378684B  | 13.58 | <i>G. soja</i> | Wild soybean    | Japan   | Saitama          | 1973 | ND                                  | 48813 | ND   |

|           |               |       |                |                 |       |                           |      |            |       |    |
|-----------|---------------|-------|----------------|-----------------|-------|---------------------------|------|------------|-------|----|
| PI378690  | PI3786<br>90  | 17.43 | <i>G. soja</i> | Wild<br>soybean | Japan | Okawa                     | 1973 | ND         | 48620 | ND |
| PI378696A | PI3786<br>96A | 31.58 | <i>G. soja</i> | Wild<br>soybean | Japan | Simane                    | 1970 | ND         | 48823 | ND |
| PI378696B | PI3786<br>96B | 15.24 | <i>G. soja</i> | Wild<br>soybean | Japan | Simane                    | ND   | ND         | 48749 | ND |
| PI378698  | PI3786<br>98  | 30.35 | <i>G. soja</i> | Wild<br>soybean | Japan | Yamana<br>si              | 1973 | ND         | 49034 | ND |
| PI378699A | PI3786<br>99A | 16.41 | <i>G. soja</i> | Wild<br>soybean | Japan | Tokyo                     | ND   | ND         | 48504 | ND |
| PI407020  | PI4070<br>20  | 15.28 | <i>G. soja</i> | Wild<br>soybean | Japan | Akita                     | 1972 | RB<br>1072 | 49005 | ND |
| PI407038  | PI4070<br>38  | 17.02 | <i>G. soja</i> | Wild<br>soybean | Japan | Akita                     | 1972 | RB<br>1072 | 48537 | ND |
| PI407042  | PI4070<br>42  | 12.02 | <i>G. soja</i> | Wild<br>soybean | Japan | Akita                     | 1972 | RB<br>1072 | 48608 | ND |
| PI407052  | PI4070<br>52  | 31.93 | <i>G. soja</i> | Wild<br>soybean | Japan | Iwate                     | 1972 | RB<br>1072 | 48959 | ND |
| PI407077  | PI4070<br>77  | 11.12 | <i>G. soja</i> | Wild<br>soybean | Japan | Aiti                      | 1972 | RB<br>1072 | 48675 | ND |
| PI407083  | PI4070<br>83  | 31.14 | <i>G. soja</i> | Wild<br>soybean | Japan | Aiti                      | 1972 | RB<br>1072 | 48801 | ND |
| PI407085  | PI4070<br>85  | 11.06 | <i>G. soja</i> | Wild<br>soybean | Japan | Aiti                      | 1972 | RB<br>1072 | 48684 | ND |
| PI407096  | PI4070<br>96  | 11.74 | <i>G. soja</i> | Wild<br>soybean | Japan | Hyogo                     | 1972 | RB<br>1072 | 48608 | ND |
| PI407156  | PI4071<br>56  | 11.31 | <i>G. soja</i> | Wild<br>soybean | Japan | Yamana<br>si              | 1972 | RB<br>1072 | 48803 | ND |
| PI407171  | PI4071<br>71  | 9.63  | <i>G. soja</i> | Wild<br>soybean | Korea | Kyonggi                   | 1972 | K2-F       | 48454 | IV |
| PI407175  | PI4071<br>75  | 17.43 | <i>G. soja</i> | Wild<br>soybean | Korea | Kyonggi                   | 1972 | K4-B       | 48589 | IV |
| PI407179  | PI4071<br>79  | 10.68 | <i>G. soja</i> | Wild<br>soybean | Korea | Kyonggi                   | 1972 | K6-A       | 48718 | ND |
| PI407183  | PI4071<br>83  | 15.76 | <i>G. soja</i> | Wild<br>soybean | Korea | Kyonggi                   | 1972 | K8-B       | 48674 | ND |
| PI407191  | PI4071<br>91  | 9.64  | <i>G. soja</i> | Wild<br>soybean | Korea | Kyonggi                   | 1972 | K57        | 48865 | ND |
| PI407202  | PI4072<br>02  | 12.58 | <i>G. soja</i> | Wild<br>soybean | Korea | Kangwon                   | 1972 | K15        | 48852 | ND |
| PI407214  | PI4072<br>14  | 12.61 | <i>G. soja</i> | Wild<br>soybean | Korea | Chungch<br>eongbuk-<br>do | 1972 | K23-A      | 48736 | ND |
| PI407220  | PI4072<br>20  | 12.44 | <i>G. soja</i> | Wild<br>soybean | Korea | Chungch<br>eongbuk-<br>do | 1972 | K25-B      | 48650 | ND |
| PI407228  | PI4072<br>28  | 14.31 | <i>G. soja</i> | Wild<br>soybean | Korea | Chungch<br>eongbuk-<br>do | 1972 | K46-D      | 48996 | ND |
| PI407229  | PI4072<br>29  | 16.09 | <i>G. soja</i> | Wild<br>soybean | Korea | Chungch<br>eongbuk-<br>do | 1972 | K47-A      | 48830 | ND |

|           |           |       |                |              |       |                   |      |       |       |    |
|-----------|-----------|-------|----------------|--------------|-------|-------------------|------|-------|-------|----|
| PI407231  | PI407231  | 9.60  | <i>G. soja</i> | Wild soybean | Korea | Chungcheongnamdo  | 1972 | K47-c | 48652 | ND |
| PI407239  | PI407239  | 11.35 | <i>G. soja</i> | Wild soybean | Korea | Chungcheongnamdo  | 1972 | K55   | 48659 | ND |
| PI407240  | PI407240  | 11.25 | <i>G. soja</i> | Wild soybean | Korea | Kyongsang Puk     | 1972 | ND    | 48737 | ND |
| PI407241  | PI407241  | 10.38 | <i>G. soja</i> | Wild soybean | Korea | Kyongsang Puk     | 1972 | K35-B | 48462 | ND |
| PI407243  | PI407243  | 12.24 | <i>G. soja</i> | Wild soybean | Korea | Kyongsang Puk     | ND   | ND    | 48760 | ND |
| PI407262  | PI407262  | 19.03 | <i>G. soja</i> | Wild soybean | Korea | kyongsang         | ND   | ND    | 48601 | ND |
| PI407270  | PI407270  | 18.34 | <i>G. soja</i> | Wild soybean | Korea | kyongsang         | ND   | ND    | 48602 | ND |
| PI407281  | PI407281  | 28.89 | <i>G. soja</i> | Wild soybean | Korea | Cheju             | ND   | ND    | 48985 | ND |
| PI407286  | PI407286  | 29.19 | <i>G. soja</i> | Wild soybean | Japan | Kanagawa          | ND   | ND    | 48897 | ND |
| PI407287  | PI407287  | 11.84 | <i>G. soja</i> | Wild soybean | Japan | Kanagawa          | ND   | ND    | 49042 | ND |
| PI407300  | PI407300  | 10.72 | <i>G. soja</i> | Wild soybean | China | Jiangsu           | ND   | ND    | 48603 | ND |
| PI407303  | PI407303  | 30.44 | <i>G. soja</i> | Wild soybean | China | Jiangsu           | ND   | ND    | 48991 | ND |
| PI407307  | PI407307  | 19.35 | <i>G. soja</i> | Wild soybean | China | Shanghai          | ND   | ND    | 48671 | ND |
| PI407308  | PI407308  | 32.55 | <i>G. soja</i> | Wild soybean | Korea | Kyonggi           | ND   | ND    | 49039 | ND |
| PI407315  | PI407315  | 16.69 | <i>G. soja</i> | Wild soybean | Korea | Chungcheongbuk-do | ND   | ND    | 48574 | ND |
| PI407318A | PI407318A | 17.00 | <i>G. soja</i> | Wild soybean | Korea | Chungcheongbuk-do | ND   | ND    | 48731 | ND |
| PI424004B | PI424004B | 15.75 | <i>G. soja</i> | Wild soybean | Korea | Kyonggi           | ND   | ND    | 48901 | II |
| PI424007  | PI424007  | 17.32 | <i>G. soja</i> | Wild soybean | Korea | Kyonggi           | ND   | ND    | 49247 | ND |
| PI424008A | PI424008A | 31.02 | <i>G. soja</i> | Wild soybean | Korea | Kyonggi           | ND   | ND    | 49129 | ND |
| PI424014  | PI424014  | 15.07 | <i>G. soja</i> | Wild soybean | Korea | Kangwon           | ND   | ND    | 48551 | ND |
| PI424025B | PI424025B | 20.45 | <i>G. soja</i> | Wild soybean | Korea | Kyonggi           | ND   | ND    | 49017 | ND |
| PI424045  | PI424045  | 12.13 | <i>G. soja</i> | Wild soybean | Korea | Kyonggi           | ND   | ND    | 48682 | ND |
| PI424070B | PI424070B | 10.51 | <i>G. soja</i> | Wild soybean | Korea | Kangwon           | ND   | ND    | 48762 | ND |

|           |           |       |                |              |        |              |      |             |       |     |
|-----------|-----------|-------|----------------|--------------|--------|--------------|------|-------------|-------|-----|
| PI424083A | PI424083A | 15.61 | <i>G. soja</i> | Wild soybean | Korea  | Kangwon      | ND   | ND          | 48889 | ND  |
| PI424102A | PI424102A | 9.81  | <i>G. soja</i> | Wild soybean | Korea  | kyongsan     | ND   | ND          | 48797 | ND  |
| PI424107A | PI424107A | 19.49 | <i>G. soja</i> | Wild soybean | Korea  | kyongsan     | ND   | ND          | 48588 | ND  |
| PI447003A | PI447003A | 28.01 | <i>G. soja</i> | Wild soybean | China  | Neimongoi    | ND   | ND          | 49132 | 0   |
| PI464890B | PI464890B | 11.14 | <i>G. soja</i> | Wild soybean | China  | Jilin        | ND   | ND          | 48635 | I   |
| PI464925B | PI464925B | 10.75 | <i>G. soja</i> | Wild soybean | China  | Liaoning     | ND   | ND          | 48748 | 0   |
| PI468918  | PI468918  | 32.50 | <i>G. soja</i> | Wild soybean | China  | Liaoning     | ND   | ND          | 49041 | III |
| PI479746B | PI479746B | 13.61 | <i>G. soja</i> | Wild soybean | China  | Jilin        | ND   | ND          | 48980 | II  |
| PI479768  | PI479768  | 22.89 | <i>G. soja</i> | Wild soybean | China  | Heilongjiang | ND   | ND          | 49008 | 0   |
| PI483466  | PI483466  | 11.60 | <i>G. soja</i> | Wild soybean | China  | Shandong     | ND   | ND          | 48953 | ND  |
| PI507609  | PI507609  | 18.13 | <i>G. soja</i> | Wild soybean | Japan  | Totigi       | ND   | ND          | 48548 | ND  |
| PI507615  | PI507615  | 20.53 | <i>G. soja</i> | Wild soybean | Japan  | Nagano       | ND   | ND          | 48543 | ND  |
| PI507618  | PI507618  | 15.48 | <i>G. soja</i> | Wild soybean | Japan  | Nagano       | ND   | ND          | 48628 | ND  |
| PI507619B | PI507619B | 17.39 | <i>G. soja</i> | Wild soybean | Japan  | Nagano       | ND   | ND          | 48528 | ND  |
| PI507624  | PI507624  | 12.25 | <i>G. soja</i> | Wild soybean | Japan  | Gihu         | 1983 | NIAR 050002 | 48540 | ND  |
| PI507638  | PI507638  | 18.81 | <i>G. soja</i> | Wild soybean | Japan  | Hyogo        | ND   | ND          | 48649 | ND  |
| PI507641  | PI507641  | 14.17 | <i>G. soja</i> | Wild soybean | Japan  | Hyogo        | ND   | ND          | 48667 | ND  |
| PI507667  | PI507667  | 20.34 | <i>G. soja</i> | Wild soybean | Japan  | Kumamoto     | ND   | ND          | 48550 | ND  |
| PI507752  | PI507752  | 32.95 | <i>G. soja</i> | Wild soybean | Russia | Amur         | ND   | ND          | 48876 | ND  |
| PI507757  | PI507757  | 11.44 | <i>G. soja</i> | Wild soybean | Russia | Amur         | ND   | ND          | 48788 | ND  |
| PI507761  | PI507761  | 15.10 | <i>G. soja</i> | Wild soybean | Russia | Amur         | ND   | ND          | 48760 | ND  |
| PI507830B | PI507830B | 18.23 | <i>G. soja</i> | Wild soybean | Russia | Primorye     | ND   | ND          | 48510 | ND  |
| PI507847  | PI507847  | 18.79 | <i>G. soja</i> | Wild soybean | Russia | Amur         | ND   | ND          | 48591 | ND  |
| PI522209B | PI522209B | 10.59 | <i>G. soja</i> | Wild soybean | Russia | Primorye     | ND   | ND          | 48647 | ND  |

|           |               |       |                |                    |        |                                      |      |                                         |       |    |
|-----------|---------------|-------|----------------|--------------------|--------|--------------------------------------|------|-----------------------------------------|-------|----|
| PI522235B | PI5222<br>35B | 13.46 | <i>G. soja</i> | Wild<br>soybean    | Russia | Primorye                             | 1988 | ND                                      | 48427 | ND |
| PI532450  | PI5324<br>50  | 17.16 | <i>G. soja</i> | Wild<br>soybean    | China  | Jilin                                | ND   | ND                                      | 48534 | ND |
| PI549032  | PI5490<br>32  | 11.57 | <i>G. soja</i> | Wild<br>soybean    | China  | Liaoning                             | ND   | ND                                      | 48591 | ND |
| PI549047  | PI5490<br>47  | 19.29 | <i>G. soja</i> | Wild<br>soybean    | China  | Beijing                              | ND   | Mrs.<br>Wong's<br>Picnic                | 48472 | ND |
| PI549048  | PI5490<br>48  | 20.33 | <i>G. soja</i> | Wild<br>soybean    | China  | Beijing                              | ND   | ND                                      | 48505 | ND |
| PI562534  | PI5625<br>34  | 17.42 | <i>G. soja</i> | Wild<br>soybean    | Korea  | kyonggi<br>Chungch<br>eongbuk-<br>do | ND   | ND                                      | 48571 | ND |
| PI562551  | PI5625<br>51  | 12.11 | <i>G. soja</i> | Wild<br>soybean    | Korea  | Chungch<br>eongbuk-<br>do            | 1986 | KC26                                    | 48685 | ND |
| PI562553  | PI5625<br>53  | 10.74 | <i>G. soja</i> | Wild<br>soybean    | Korea  | Chungch<br>eongbuk-<br>do            | 1986 | ND                                      | 48577 | ND |
| PI562557  | PI5625<br>57  | 15.40 | <i>G. soja</i> | Wild<br>soybean    | Korea  | Cholla                               | 1986 | KE10                                    | 48523 | ND |
| PI562558  | PI5625<br>58  | 29.98 | <i>G. soja</i> | Wild<br>soybean    | Korea  | Cholla<br>Puk                        | 1986 | KE12                                    | 48947 | ND |
| PI562564  | PI5625<br>64  | 13.49 | <i>G. soja</i> | Wild<br>soybean    | Korea  | Cholla<br>Puk                        | 1992 | ND                                      | 48379 | ND |
| PI562568  | PI5625<br>68  | 15.70 | <i>G. soja</i> | Wild<br>soybean    | Korea  | Cholla                               | 1986 | KF24                                    | 48521 | ND |
| PI597448D | PI5974<br>48D | 14.99 | <i>G. soja</i> | Wild<br>soybean    | China  | Heilongji<br>ang                     | ND   | ND                                      | 48557 | ND |
| PI597458B | PI5974<br>58B | 31.02 | <i>G. soja</i> | Wild<br>soybean    | China  | Shandon<br>g                         | ND   | ND                                      | 49007 | ND |
| PI597458C | PI5974<br>58C | 10.00 | <i>G. soja</i> | Wild<br>soybean    | China  | Shandon<br>g                         | ND   | ND                                      | 48549 | ND |
| PI597460A | PI5974<br>60A | 13.84 | <i>G. soja</i> | Wild<br>soybean    | China  | Shandon<br>g                         | 1996 | ND                                      | 48526 | ND |
| PI597461B | PI5974<br>61B | 13.14 | <i>G. soja</i> | Wild<br>soybean    | China  | Shandon<br>g                         | ND   | ND                                      | 48790 | ND |
| PI597462B | PI5974<br>62B | 10.23 | <i>G. soja</i> | Wild<br>soybean    | China  | Shandon<br>g                         | ND   | ND                                      | 48536 | ND |
| PI597471D | PI5974<br>71D | 27.84 | <i>G. soja</i> | Wild<br>soybean    | China  | Zhejiang                             | ND   | ND<br>BARC-<br>15 non-<br>nodulat<br>ed | 48901 | ND |
| PI602450  | PI6024<br>50  | 14.98 | <i>G. max</i>  | Modern<br>cultivar | USA    | Maryland                             | 1998 |                                         | 48357 | IV |
| PI639586  | PI6395<br>86  | 21.34 | <i>G. soja</i> | Wild<br>soybean    | Russia | Amur                                 | ND   | ND                                      | 48516 | ND |
| PI639588B | PI6395<br>88B | 28.64 | <i>G. soja</i> | Wild<br>soybean    | Russia | Amur                                 | 2005 | KA 325                                  | 48519 | ND |
| PI639590A | PI6395<br>90A | 27.83 | <i>G. soja</i> | Wild<br>soybean    | Russia | Amur                                 | ND   | ND                                      | 48756 | ND |

|            |               |       |                |                    |        |                   |      |       |       |    |
|------------|---------------|-------|----------------|--------------------|--------|-------------------|------|-------|-------|----|
| PI639590B  | PI6395<br>90B | 17.81 | <i>G. soja</i> | Wild<br>soybean    | Russia | Amur              | ND   | ND    | 48448 | ND |
| PI639621   | PI6396<br>21  | 33.05 | <i>G. soja</i> | Wild<br>soybean    | Russia | Amur              | ND   | ND    | 48708 | ND |
| PI639623A  | PI6396<br>23A | 10.47 | <i>G. soja</i> | Wild<br>soybean    | Russia | Amur              | ND   | ND    | 48664 | ND |
| PI639635   | PI6396<br>35  | 13.00 | <i>G. soja</i> | Wild<br>soybean    | Russia | Primorye          | ND   | ND    | 48576 | ND |
| SC-04      | PI6584<br>98  | 21.88 | <i>G. max</i>  | Modern<br>cultivar | USA    | North<br>Carolina | 2009 | N6202 | 48570 | VI |
| SRR1533155 | PI5625<br>65  | 18.68 | <i>G. soja</i> | Wild<br>soybean    | Korea  | Cholla<br>Puk     | ND   | ND    | 49089 | ND |
| SRR1533157 | PI3935<br>51  | 13.78 | <i>G. soja</i> | Wild<br>soybean    | Taiwan | Taiwan            | 1974 | ND    | 48810 | ND |
| SRR1533161 | PI5939<br>83  | 18.56 | <i>G. soja</i> | Wild<br>soybean    | Japan  | Hokkaido          | ND   | ND    | 48910 | ND |
| SRR1533162 | PI4070<br>27  | 13.65 | <i>G. soja</i> | Wild<br>soybean    | Japan  | Akita             | ND   | ND    | 49044 | ND |
| SRR1533163 | PI5625<br>59  | 18.41 | <i>G. soja</i> | Wild<br>soybean    | Korea  | Cholla<br>Puk     | ND   | ND    | 48928 | ND |
| SRR1533164 | PI5974<br>59C | 16.52 | <i>G. soja</i> | Wild<br>soybean    | China  | Shandon<br>g      | ND   | ND    | 48917 | ND |
| SRR1533168 | PI4071<br>70  | 29.44 | <i>G. soja</i> | Wild<br>soybean    | Korea  | Kyonggi           | ND   | ND    | 49412 | ND |
| SRR1533169 | PI4071<br>31  | 17.46 | <i>G. soja</i> | Wild<br>soybean    | Japan  | Kumamo<br>to      | ND   | ND    | 49205 | ND |
| SRR1533172 | PI4797<br>52  | 14.12 | <i>G. soja</i> | Wild<br>soybean    | China  | Jilin             | ND   | ND    | 48884 | I  |
| SRR1533174 | PI3661<br>23  | 17.00 | <i>G. soja</i> | Wild<br>soybean    | Japan  | Iwate             | 1971 | ND    | 48853 | IV |
| SRR1533175 | PI4585<br>36  | 21.00 | <i>G. soja</i> | Wild<br>soybean    | China  | Heilongji<br>ang  | ND   | ND    | 49206 | 0  |
| SRR1533176 | PI4071<br>97  | 15.25 | <i>G. soja</i> | Wild<br>soybean    | Korea  | Kangwon           | ND   | ND    | 48895 | ND |
| SRR1533178 | PI5221<br>82B | 16.47 | <i>G. soja</i> | Wild<br>soybean    | China  | Heilongji<br>ang  | ND   | ND    | 48903 | ND |
| SRR1533180 | PI3786<br>92  | 15.45 | <i>G. soja</i> | Wild<br>soybean    | Japan  | Iwate             | ND   | ND    | 48807 | IV |
| SRR1533181 | PI4649<br>29A | 15.84 | <i>G. soja</i> | Wild<br>soybean    | China  | Liaoning          | ND   | ND    | 48903 | 0  |
| SRR1533182 | PI4072<br>46  | 16.11 | <i>G. soja</i> | Wild<br>soybean    | Korea  | Kyongsa<br>ng Puk | ND   | ND    | 49102 | ND |
| SRR1533183 | PI4649<br>35  | 17.55 | <i>G. soja</i> | Wild<br>soybean    | China  | Jiangsu           | ND   | ND    | 48802 | ND |
| SRR1533185 | PI5222<br>28  | 18.14 | <i>G. soja</i> | Wild<br>soybean    | Russia | Primorye          | ND   | ND    | 48943 | ND |
| SRR1533187 | PI4072<br>75  | 15.84 | <i>G. soja</i> | Wild<br>soybean    | Korea  | Kyonggi           | ND   | ND    | 49122 | IV |

|            |               |       |                |                 |        |                           |      |                            |       |    |
|------------|---------------|-------|----------------|-----------------|--------|---------------------------|------|----------------------------|-------|----|
| SRR1533188 | PI4649<br>29B | 16.04 | <i>G. soja</i> | Wild<br>soybean | China  | Liaoning                  | ND   | ND                         | 49100 | 0  |
| SRR1533190 | PI3265<br>82A | 11.24 | <i>G. soja</i> | Wild<br>soybean | Russia | Primorye                  | ND   | ND                         | 49270 | II |
| SRR1533191 | PI5222<br>16  | 15.76 | <i>G. soja</i> | Wild<br>soybean | Russia | Primorye                  | ND   | ND                         | 49013 | ND |
| SRR1533192 | PI4684<br>00A | 17.13 | <i>G. soja</i> | Wild<br>soybean | China  | Ningxia                   | ND   | ND                         | 48961 | IV |
| SRR1533193 | PI4797<br>69  | 17.99 | <i>G. soja</i> | Wild<br>soybean | China  | Heilongji<br>ang          | ND   | ND                         | 48954 | 0  |
| SRR1533194 | PI4240<br>96  | 14.74 | <i>G. soja</i> | Wild<br>soybean | Korea  | Chungch<br>eongbuk-<br>do | ND   | ND                         | 48829 | ND |
| SRR1533196 | PI5042<br>86  | 16.71 | <i>G. soja</i> | Wild<br>soybean | Korea  | Chungch<br>eongbuk-<br>do | ND   | ND                         | 49158 | ND |
| SRR1533197 | PI4585<br>38  | 17.86 | <i>G. soja</i> | Wild<br>soybean | China  | Heilongji<br>ang          | ND   | ND                         | 49001 | 0  |
| SRR1533198 | PI4585<br>35  | 15.60 | <i>G. soja</i> | Wild<br>soybean | China  | Heilongji<br>ang          | ND   | ND                         | 48951 | 0  |
| SRR1533199 | PI4072<br>85  | 15.62 | <i>G. soja</i> | Wild<br>soybean | Japan  | Kanagaw<br>a              | 1974 | Yasei<br>Daizu             | 48801 | ND |
| SRR1533202 | PI4072<br>88  | 16.54 | <i>G. soja</i> | Wild<br>soybean | China  | Jilin<br>Habarov<br>sk    | 1974 | ND                         | 48989 | II |
| SRR1533203 | PI5783<br>41  | 17.65 | <i>G. soja</i> | Wild<br>soybean | Russia | region                    | 1992 | VIR<br>8512                | 48931 | ND |
| SRR1533204 | PI5490<br>46  | 21.10 | <i>G. soja</i> | Wild<br>soybean | China  | Ningxia                   | 1990 | ZYD<br>3728                | 49181 | ND |
| SRR1533205 | PI4649<br>27A | 17.01 | <i>G. soja</i> | Wild<br>soybean | China  | Liaoning                  | 1982 | LS-005                     | 48930 | 0  |
| SRR1533206 | PI4834<br>65  | 16.36 | <i>G. soja</i> | Wild<br>soybean | China  | Shanxi                    | 1984 | ND                         | 49072 | ND |
| SRR1533210 | PI5974<br>59D | 17.90 | <i>G. soja</i> | Wild<br>soybean | China  | Shandon<br>g              | 1996 | ZYD32<br>34                | 48941 | ND |
| SRR1533211 | PI5974<br>61A | 21.32 | <i>G. soja</i> | Wild<br>soybean | China  | Shandon<br>g              | 1996 | ZYD32<br>43                | 49383 | ND |
| SRR1533212 | PI5222<br>26  | 14.50 | <i>G. soja</i> | Wild<br>soybean | Russia | Far East                  | 1988 | VIR<br>8511                | 48917 | ND |
| SRR1533216 | PI5946<br>15  | 33.17 | <i>G. max</i>  | Landrace        | China  | Guizhou                   | 1996 | Liu yue<br>zao             | 48897 | IV |
| SRR1533220 | PI1961<br>66  | 14.66 | <i>G. max</i>  | Landrace        | Korea  | ND                        | 1947 | No.<br>2296                | 48516 | V  |
| SRR1533221 | PI4673<br>43  | 19.37 | <i>G. max</i>  | Landrace        | China  | Jilin                     | 1982 | Yan-<br>nong<br>No. 2      | 48597 | I  |
| SRR1533229 | PI4169<br>71  | 14.73 | <i>G. max</i>  | Landrace        | Japan  | Kinki                     | 1974 | Kaifuu<br>gyuumo<br>u ou 1 | 48738 | IV |
| SRR1533230 | PI5947<br>77  | 23.35 | <i>G. max</i>  | Landrace        | China  | Yunnan                    | 1996 | Liu yue<br>huang           | 48439 | IV |
| SRR1533231 | PI5483<br>12  | 21.01 | <i>G. max</i>  | Old cultivar    | China  | Heilongji<br>ang          | 1945 | Cayuga<br>Tokei            | 48600 | I  |
| SRR1533235 | PI5073<br>55  | 19.71 | <i>G. max</i>  | Landrace        | Japan  | Hokkaido                  | 1987 | 423                        | 48624 | I  |

|            |               |       |               |              |         |                  |      |                                                                                  |       |     |
|------------|---------------|-------|---------------|--------------|---------|------------------|------|----------------------------------------------------------------------------------|-------|-----|
| SRR1533236 | PI5875<br>52  | 17.87 | <i>G. max</i> | Landrace     | China   | Jiangsu          | 1995 | Nan<br>jing da<br>Ping<br>ding<br>huang<br>yi No. 1<br>Qing pi<br>si li<br>huang | 48807 | VII |
| SRR1533239 | PI6033<br>36  | 40.39 | <i>G. max</i> | Landrace     | China   | Heilongji<br>ang | 1998 |                                                                                  | 48892 | II  |
| SRR1533243 | PI6029<br>91  | 15.21 | <i>G. max</i> | Landrace     | China   | Shandon<br>g     | 1998 | Niu jiao<br>qi da<br>hei dou                                                     | 48403 | IV  |
| SRR1533245 | PI4078<br>01  | 10.81 | <i>G. max</i> | Landrace     | Korea   | Kyonggi          | 1975 | ND                                                                               | 48383 | VI  |
| SRR1533248 | PI3982<br>96  | 19.67 | <i>G. max</i> | Landrace     | Korea   | Kyonggi          | 1972 | KAS<br>173-3                                                                     | 48636 | II  |
| SRR1533257 | PI5484<br>17  | 11.00 | <i>G. max</i> | Old cultivar | Italy   | ND               | 1910 | Soysota                                                                          | 48518 | I   |
| SRR1533259 | PI5947<br>88  | 10.98 | <i>G. max</i> | Landrace     | China   | Guizhou          | 1996 | Liu yue<br>zao                                                                   | 48701 | ND  |
| SRR1533266 | PI4384<br>98  | 11.01 | <i>G. max</i> | Landrace     | USA     | ND               | 1979 | Sable                                                                            | 48490 | IV  |
| SRR1533269 | PI1532<br>62  | 11.06 | <i>G. max</i> | Landrace     | Belgium | ND               | 1946 | Rouma<br>nie                                                                     | 48374 | 0   |
| SRR1533271 | PI6033<br>18  | 13.86 | <i>G. max</i> | Landrace     | China   | Heilongji<br>ang | 1998 | Xiao<br>zhu yao                                                                  | 48487 | I   |
| SRR1533272 | PI4376<br>53  | 13.78 | <i>G. max</i> | Landrace     | China   | ND               | 1979 | Er-da-li                                                                         | 48618 | II  |
| SRR1533278 | PI5671<br>89A | 14.54 | <i>G. max</i> | Landrace     | Vietnam | ND               | 1993 | Ekhaba<br>c                                                                      | 48607 | IV  |
| SRR1533279 | PI5484<br>06  | 14.56 | <i>G. max</i> | Old cultivar | China   | ND               | ND   | ND                                                                               | 48601 | II  |
| SRR1533282 | PI3235<br>76  | 11.07 | <i>G. max</i> | Landrace     | India   | Uttar<br>Pradesh | 1967 | H 67-27                                                                          | 49088 | IX  |
| SRR1533283 | PI5483<br>82  | 13.41 | <i>G. max</i> | Old cultivar | ND      | ND               | 1922 | Manitob<br>a Brown<br>Gokuwa<br>se                                               | 48580 | 0   |
| SRR1533284 | PI4168<br>90  | 12.86 | <i>G. max</i> | Landrace     | Japan   | Kanto            | 1974 | natsu<br>daizu<br>Xian<br>ning<br>dong<br>huang                                  | 49214 | 0   |
| SRR1533285 | PI5877<br>52  | 13.70 | <i>G. max</i> | Landrace     | China   | Hubei            | 1994 | dou jia                                                                          | 48492 | V   |
| SRR1533286 | PI4243<br>91  | 14.32 | <i>G. max</i> | Landrace     | Korea   | Cholla<br>Puk    | 1978 | KAS<br>521-15                                                                    | 48511 | VI  |
| SRR1533288 | PI6033<br>57  | 13.90 | <i>G. max</i> | Landrace     | China   | Jilin            | 1998 | Du Lu                                                                            | 48547 | I   |
| SRR1533290 | PI4379<br>44  | 11.93 | <i>G. max</i> | Landrace     | China   | Northeas<br>t    | 1979 | Dou                                                                              | 48484 | II  |
| SRR1533292 | PI1574<br>21  | 9.66  | <i>G. max</i> | Landrace     | Korea   | South            | 1947 | ND                                                                               | 48484 | II  |
| SRR1533292 |               |       |               |              |         |                  |      | Ebony                                                                            | 48921 | III |
| SRR1533295 | PI5673<br>64  | 20.20 | <i>G. max</i> | Landrace     | China   | Ningxia          | 1993 | Ping luo<br>huang<br>da dou<br>A.K.<br>(Harrow<br>)                              | 48631 | III |
| SRR1533297 | PI5482<br>98  | 21.68 | <i>G. max</i> | Old cultivar | China   | ND               | 1939 |                                                                                  | 48491 | III |
| SRR1533299 | PI5484<br>88  | 19.11 | <i>G. max</i> | Old cultivar | China   | Heilongji<br>ang | 1938 | S-100                                                                            | 48376 | V   |
| SRR1533301 | PI4239<br>54  | 13.35 | <i>G. max</i> | Landrace     | Japan   | Kumamo<br>to     | 1976 | Shirom<br>e                                                                      | 48548 | 0   |

|            |               |       |               |                    |                  |                    |      |                                      |                                   |     |  |
|------------|---------------|-------|---------------|--------------------|------------------|--------------------|------|--------------------------------------|-----------------------------------|-----|--|
|            |               |       |               |                    |                  |                    |      |                                      | Wu<br>chang<br>hei<br>dong<br>dou |     |  |
| SRR1533302 | PI5878<br>48  | 13.92 | <i>G. max</i> | Landrace           | China            | Hubei              | 1994 |                                      | 48477                             | V   |  |
| SRR1533303 | PI5876<br>66  | 22.38 | <i>G. max</i> | Landrace           | China            | Anhui              | 1994 | Er dao<br>zao                        | 48653                             | VI  |  |
| SRR1533310 | PI3173<br>34A | 12.80 | <i>G. max</i> | Landrace           | Japan            | Hokkaido           | 1966 | Kitamis<br>hiro                      | 48505                             | I   |  |
| SRR1533312 | PI5484<br>56  | 13.99 | <i>G. max</i> | Old cultivar       | Korea            | Phyeong<br>yang    | 1991 | Haberla<br>nd                        | 48538                             | VI  |  |
| SRR1533314 | PI5880<br>53A | 16.56 | <i>G. max</i> | Landrace           | China            | Guangdc<br>ng      | ND   | ND                                   | 48582                             | V   |  |
| SRR1533315 | PI5946<br>29  | 15.96 | <i>G. max</i> | Landrace           | China            | Guizhou            | 1996 | Xiao<br>hua lian                     | 48568                             | VI  |  |
| SRR1533319 | PI5672<br>58  | 12.65 | <i>G. max</i> | Landrace           | China            | Jiangxi            | 1993 | NC<br>9173                           | 48368                             | II  |  |
| SRR1533324 | PI3173<br>36  | 15.30 | <i>G. max</i> | Landrace           | Japan            | Hokkaido           | 1966 | Shinsei<br>Zhong<br>he tian<br>cheng | 48554                             | 0   |  |
| SRR1533326 | PI5945<br>79  | 25.16 | <i>G. max</i> | Landrace           | China            | Hunan              | 1996 | dou                                  | 48689                             | V   |  |
| SRR1533328 | PI2536<br>58B | 11.44 | <i>G. max</i> | Landrace           | China            | ND                 | ND   | ND                                   | 48200                             | I   |  |
| SRR1533332 | PI5672<br>93  | 20.22 | <i>G. max</i> | Landrace           | China            | Gansu              | 1993 | Ben di<br>huang<br>dou               | 48806                             | II  |  |
| SRR1533333 | PI4078<br>49  | 16.27 | <i>G. max</i> | Landrace           | Korea            | Cholla<br>Puk      | 1975 | KAS<br>510-1                         | 48576                             | III |  |
| SRR1533336 | PI8913<br>8   | 16.85 | <i>G. max</i> | Landrace           | Korea            | Hamkys<br>ongpukto | 1930 | Zontano<br>rukun                     | 48486                             | II  |  |
| SRR1533338 | PI4173<br>98  | 14.32 | <i>G. max</i> | Landrace           | China            | ND                 | 1974 | Touhou<br>torotou                    | 48467                             | III |  |
| SRR1533341 | PI2435<br>41  | 14.98 | <i>G. max</i> | Landrace           | Japan            | Akita              | 1957 | Shakujo                              | 48515                             | IV  |  |
| SRR1533345 | PI5483<br>62  | 17.97 | <i>G. max</i> | Old cultivar       | USA              | Illinois           | 1954 | Lincoln                              | 48345                             | III |  |
| SRR1533348 | PI5914<br>95  | 17.45 | <i>G. max</i> | Modern<br>cultivar | USA              | Illinois           | 1995 | L93-<br>2740                         | 48634                             | IV  |  |
| SRR1533351 | PI5486<br>34  | 14.70 | <i>G. max</i> | Modern<br>cultivar | USA              | Ohio               | 1984 | Zane                                 | 48552                             | III |  |
| SRR1533353 | PI5474<br>59  | 9.60  | <i>G. max</i> | Modern<br>cultivar | USA              | Illinois           | 1975 | L64-<br>1081                         | 48532                             | IV  |  |
| SRR1533356 | PI5530<br>47  | 11.28 | <i>G. max</i> | Modern<br>cultivar | USA              | Georgia            | 1991 | Gordon                               | 48371                             | VII |  |
| SRR1533357 | PI5475<br>62  | 10.72 | <i>G. max</i> | Modern<br>cultivar | USA              | Illinois           | 1975 | L72-<br>2157                         | 48200                             | IV  |  |
| SRR1533362 | PI5336<br>55  | 15.87 | <i>G. max</i> | Modern<br>cultivar | USA              | Illinois           | 1980 | Burlison                             | 48424                             | II  |  |
| SRR1533365 | PI5486<br>38  | 15.47 | <i>G. max</i> | Modern<br>cultivar | Canada           | Ontario            | 1987 | OAC<br>Libra                         | 49019                             | 0   |  |
| SRR1533366 | PI5474<br>60  | 16.19 | <i>G. max</i> | Modern<br>cultivar | USA              | Illinois           | 1975 | L64-<br>1083                         | 48546                             | IV  |  |
| SRR1533369 | PI5187<br>50  | 16.94 | <i>G. max</i> | Modern<br>cultivar | Former<br>Serbia | ND                 | 1988 | NS-16                                | 48591                             | I   |  |
| SRR1533371 | PI5485<br>40  | 25.01 | <i>G. max</i> | Modern<br>cultivar | USA              | Iowa               | 1963 | Corsoy                               | 48675                             | II  |  |
| SRR1533374 | PI5476<br>86  | 18.83 | <i>G. max</i> | Modern<br>cultivar | USA              | Illinois           | 1972 | L62-<br>956                          | 48575                             | II  |  |

|            |              |       |                |                 |        |                   |      |                |       |     |
|------------|--------------|-------|----------------|-----------------|--------|-------------------|------|----------------|-------|-----|
| SRR1533378 | PI5483<br>11 | 16.90 | <i>G. max</i>  | Old cultivar    | Canada | Ontario           | 1988 | CaPItal        | 48412 | 0   |
| SRR1533381 | PI5914<br>35 | 32.65 | <i>G. max</i>  | Modern cultivar | Canada | Ontario           | 1995 | OT94-41        | 48465 | ND  |
| SRR1533384 | PI5485<br>12 | 13.81 | <i>G. max</i>  | Modern cultivar | USA    | Indiana           | 1978 | Century        | 48506 | II  |
| SRR1533385 | PI5476<br>90 | 15.72 | <i>G. max</i>  | Modern cultivar | USA    | Illinois          | 1972 | L63-1212       | 48333 | II  |
| SRR1533386 | PI5481<br>82 | 20.51 | <i>G. max</i>  | Modern cultivar | USA    | Illinois          | 1954 | T157           | 48646 | III |
| SRR1533387 | PI5159<br>61 | 17.98 | <i>G. max</i>  | Modern cultivar | USA    | Kentucky          | 1987 | Pennyril<br>e  | 48640 | IV  |
| SRR1533389 | PI5483<br>91 | 21.85 | <i>G. max</i>  | Old cultivar    | China  | Liaoning          | 1952 | Mukden         | 48686 | II  |
| SRR1533395 | PI5486<br>31 | 9.91  | <i>G. max</i>  | Modern cultivar | USA    | Illinois          | 1970 | William<br>s   | 48366 | III |
| SRR1533396 | PI5477<br>79 | 9.78  | <i>G. max</i>  | Modern cultivar | USA    | Illinois          | 1989 | L72D-4110      | 48408 | II  |
| SRR1533409 | PI5460<br>44 | 9.87  | <i>G. max</i>  | Modern cultivar | Canada | Ontario           | 1990 | OT89-06        | 48570 | ND  |
| SRR1533415 | PI5485<br>73 | 15.05 | <i>G. max</i>  | Modern cultivar | Canada | Ontario           | 1956 | Haroso<br>y    | 48491 | II  |
| SRR1533419 | PI5336<br>02 | 14.75 | <i>G. max</i>  | Modern cultivar | USA    | Arkansas          | 1989 | Lloyd          | 48382 | VI  |
| SRR1533423 | PI5366<br>35 | 13.20 | <i>G. max</i>  | Modern cultivar | USA    | Ohio              | 1979 | Sprite         | 48437 | III |
| SRR1533427 | PI5915<br>41 | 15.55 | <i>G. max</i>  | Modern cultivar | USA    | Illinois          | 1995 | L74-102        | 48443 | II  |
| SRR1533429 | PI5485<br>93 | 15.46 | <i>G. max</i>  | Modern cultivar | Canada | Ontario           | 1980 | Maple<br>Arrow | 48487 | 0   |
| SRR1533436 | PI5915<br>11 | 18.91 | <i>G. max</i>  | Modern cultivar | USA    | Illinois          | 1995 | L89-1581       | 48555 | III |
| SRR1533438 | PI5133<br>82 | 15.96 | <i>G. max</i>  | Modern cultivar | USA    | Minnesot<br>a     | 1987 | Glenwo<br>od   | 48673 | 0   |
| SRR1533441 | PI5489<br>85 | 16.27 | <i>G. max</i>  | Modern cultivar | USA    | South<br>Carolina | 1991 | Kersha<br>w    | 48559 | VI  |
| SRR1533442 | PI5484<br>77 | 14.79 | <i>G. max</i>  | Old cultivar    | USA    | Tenness<br>ee     | 1991 | Ogden          | 49248 | VI  |
| SRR1533444 | PI5476<br>80 | 16.12 | <i>G. max</i>  | Modern cultivar | USA    | Illinois          | 1972 | L62-17         | 48456 | II  |
| SRR1533446 | PI5914<br>31 | 15.11 | <i>G. max</i>  | Modern cultivar | Canada | Ontario           | 1995 | OT94-49        | 48289 | ND  |
| SRR1533451 | PI5424<br>03 | 19.59 | <i>G. max</i>  | Modern cultivar | USA    | Minnesot<br>a     | 1983 | Dawson         | 48629 | 0   |
| TC21       | PI6156<br>95 | 56.70 | <i>G. max</i>  | Modern cultivar | USA    | North<br>Carolina | 2001 | N7103          | 49354 | VII |
| TC22       | PI3661<br>22 | 81.35 | <i>G. soja</i> | Wild soybean    | Japan  | Hukusim<br>a      | 1971 | ND             | 49794 | IV  |
| US-18      | PI5950<br>99 | 13.36 | <i>G. max</i>  | Modern cultivar | USA    | Georgia           | 1996 | G93-9223       | 48772 | VII |

|         |                        |       |               |                    |             |                     |      |                         |       |      |
|---------|------------------------|-------|---------------|--------------------|-------------|---------------------|------|-------------------------|-------|------|
| US-19   | PI5953<br>62           | 16.29 | <i>G. max</i> | Landrace           | ND          | ND                  | ND   | ND                      | 48196 | IV   |
| USB-001 | PI5486<br>56<br>FC3324 | 51.81 | <i>G. max</i> | Modern<br>cultivar | USA         | Mississippi         | 1954 | Lee<br>Anderson         | 48088 | VI   |
| USB-002 | 3                      | 36.32 | <i>G. max</i> | Landrace           | ND          | ND                  | 1954 |                         | 48256 | IV   |
| USB-003 | PI8178<br>5            | 46.82 | <i>G. max</i> | Landrace           | Japan       | Hokkaido            | 1929 | Chusei<br>Hadaka        | 48478 | III  |
| USB-004 | PI1661<br>05           | 45.37 | <i>G. max</i> | Landrace           | India       | Uttar<br>Pradesh    | 1948 | Bhart<br>Strain         | 48514 | VII  |
| USB-005 | PI1805<br>01           | 48.12 | <i>G. max</i> | Landrace           | Germany     | ND                  | 1949 | No. 18                  | 48439 | 0    |
| USB-006 | PI2406<br>64           | 45.81 | <i>G. max</i> | Landrace           | Philippines | Luzon               | 1957 | Bilomi<br>No. 3         | 48397 | ND   |
| USB-007 | PI2668<br>06C          | 35.87 | <i>G. max</i> | Landrace           | China       | Hebei<br>Okhotsk    | 1960 | No. 4                   | 48385 | II   |
| USB-009 | PI3609<br>57           | 44.11 | <i>G. max</i> | Landrace           | Japan       | Sea                 | 1971 | Karafut<br>o No. 1      | 48408 | 0    |
| USB-010 | PI3610<br>87           | 44.04 | <i>G. max</i> | Landrace           | Romania     | ND                  | ND   | ND                      | 48456 | I    |
| USB-011 | PI3610<br>93           | 45.67 | <i>G. max</i> | Landrace           | Serbia      | ND                  | 1971 | Novosad<br>ska<br>Br. 1 | 48439 | I    |
| USB-012 | PI4372<br>65D          | 45.42 | <i>G. max</i> | Landrace           | Moldova     | ND                  | 1979 | Dobruza<br>anca D       | 48516 | 0    |
| USB-013 | PI4383<br>35           | 48.25 | <i>G. max</i> | Landrace           | Algeria     | ND                  | 1979 | SAO<br>196-C            | 48355 | III  |
| USB-014 | PI4689<br>08           | 59.89 | <i>G. max</i> | Landrace           | China       | Jilin               | 1982 | ND                      | 48633 | 000  |
| USB-015 | PI4979<br>64A          | 36.17 | <i>G. max</i> | Landrace           | India       | Sikkim              | 1980 | I.C.<br>9461            | 48315 | IX   |
| USB-016 | PI5068<br>62           | 35.60 | <i>G. max</i> | Landrace           | Japan       | Tohoku              | 1987 | Karikei<br>86           | 48352 | IV   |
| USB-017 | PI5071<br>80           | 45.06 | <i>G. max</i> | Landrace           | Japan       | Kanto               | 1987 | Rikuu<br>21             | 48390 | IV   |
| USB-018 | PI5186<br>68           | 49.86 | <i>G. max</i> | Modern<br>cultivar | USA         | Tennessee           | 1988 | TN 4-86                 | 48341 | IV   |
| USB-020 | PI6034<br>58A          | 43.89 | <i>G. max</i> | Landrace           | China       | ND                  | 1998 | Shuidou                 | 48616 | IV   |
| USB-021 | PI5481<br>71           | 36.63 | <i>G. max</i> | Modern<br>cultivar | USA         | Illinois            | 1954 | T134                    | 48214 | III  |
| USB-022 | PI5481<br>93           | 43.47 | <i>G. max</i> | Modern<br>cultivar | USA         | Iowa                | 1957 | T201                    | 48336 | IV   |
| USB-023 | PI5483<br>13           | 35.47 | <i>G. max</i> | Old cultivar       | Russia      | Khabarovsk          | 1949 | Chestnut                | 48318 | III  |
| USB-024 | PI5483<br>25           | 36.37 | <i>G. max</i> | Old cultivar       | Russia      | ND                  | 1955 | Flambeau                | 48365 | 0    |
| USB-025 | PI5483<br>60           | 46.35 | <i>G. max</i> | Old cultivar       | Korea       | ND                  | 1988 | Korean                  | 48395 | II   |
| USB-026 | PI5483<br>64           | 42.86 | <i>G. max</i> | Old cultivar       | Japan       | ND                  | 1882 | MacouP<br>In            | 48389 | IV   |
| USB-028 | PI5484<br>47           | 45.70 | <i>G. max</i> | Old cultivar       | China       | Zhejiang<br>Phyeong | 1991 | Cherokee                | 48451 | VIII |
| USB-029 | PI5484<br>52           | 57.61 | <i>G. max</i> | Old cultivar       | Korea       | yang                | 1991 | Dixie                   | 48500 | V    |
| USB-031 | PI5484<br>90           | 45.00 | <i>G. max</i> | Old cultivar       | Taiwan      | ND                  | 1991 | Tanner                  | 48407 | VII  |
| USB-032 | PI5485<br>20           | 44.31 | <i>G. max</i> | Modern<br>cultivar | USA         | Iowa                | 1986 | Preston                 | 48365 | II   |
| USB-033 | PI5485<br>61           | 45.66 | <i>G. max</i> | Modern<br>cultivar | USA         | Minnesota           | 1973 | Hodgson                 | 48479 | I    |
| USB-035 | PI5490<br>18           | 56.14 | <i>G. max</i> | Landrace           | China       | Ningxia             | 1973 | ZYD<br>3939             | 48674 | V    |
| USB-036 | PI5490<br>26           | 51.17 | <i>G. max</i> | Landrace           | China       | Liaoning            | 1990 | Gao li<br>huang         | 48403 | V    |

|         |               |       |               |                    |               |                           |      |                                                  |       |      |
|---------|---------------|-------|---------------|--------------------|---------------|---------------------------|------|--------------------------------------------------|-------|------|
| USB-037 | PI5490<br>41A | 56.30 | <i>G. max</i> | Landrace           | China         | Liaoning                  | 1990 | ZYD<br>2709                                      | 48569 | III  |
| USB-038 | PI5599<br>32  | 62.04 | <i>G. max</i> | Modern<br>cultivar | USA           | Maryland                  | 1991 | Manoki<br>n                                      | 48293 | IV   |
| USB-039 | PI5671<br>71  | 52.68 | <i>G. max</i> | Landrace           | China         | Shanxi                    | ND   | ND<br>Bai<br>huang<br>dou                        | 48456 | 0    |
| USB-040 | PI5674<br>26  | 55.41 | <i>G. max</i> | Landrace           | China         | Shanxi                    | 1993 | Liu shi<br>ri jin<br>huang<br>da dou             | 48488 | IV   |
| USB-041 | PI5675<br>58  | 49.35 | <i>G. max</i> | Landrace           | China         | Shandon<br>g              | 1993 | Xin<br>huang<br>dou                              | 48438 | III  |
| USB-042 | PI5676<br>04A | 43.02 | <i>G. max</i> | Landrace           | China         | Shandon<br>g              | 1993 | hou                                              | 48449 | IV   |
| USB-043 | PI5783<br>09  | 44.68 | <i>G. max</i> | Landrace           | Nepal         | ND                        | 1984 | I-64<br>Jin dou                                  | 48668 | VI   |
| USB-044 | PI5784<br>95  | 56.49 | <i>G. max</i> | Landrace           | China         | Beijing                   | 1994 | No. 4                                            | 48468 | IV   |
| USB-045 | PI5925<br>23  | 45.65 | <i>G. max</i> | Modern<br>cultivar | USA           | Minnesot<br>a             | 1995 | Glacier<br>ZDD                                   | 48408 | 0    |
| USB-046 | PI5929<br>54  | 45.65 | <i>G. max</i> | Landrace           | China         | ND                        | 1994 | 11242                                            | 48381 | II   |
| USB-047 | PI5943<br>07  | 56.19 | <i>G. max</i> | Landrace           | Japan         | ND                        | 1996 | Tsuruse<br>ngoku                                 | 48500 | VIII |
| USB-048 | PI5974<br>76  | 49.62 | <i>G. max</i> | Modern<br>cultivar | Korea         | ND                        | 1997 | Deogyu<br>kong<br>Ben di<br>yuan<br>huang<br>dou | 48345 | V    |
| USB-049 | PI6034<br>26G | 52.99 | <i>G. max</i> | Landrace           | China         | ND                        | 1998 | Ke qi<br>xiao hei<br>dou                         | 48394 | II   |
| USB-050 | PI6034<br>42  | 51.84 | <i>G. max</i> | Landrace           | China         | ND                        | 1998 |                                                  | 48620 | III  |
| USB-052 | PI8878<br>8   | 22.18 | <i>G. max</i> | Landrace           | China         | Liaoning                  | 1930 | 5913                                             | 48377 | III  |
| USB-058 | PI5486<br>58  | 16.87 | <i>G. max</i> | Modern<br>cultivar | USA           | Arkansa<br>s              | 1974 | Lee 74                                           | 47982 | VI   |
| USB-059 | FC2933<br>3   | 21.56 | <i>G. max</i> | Landrace           | ND            | ND                        | 1935 | Laredo<br>FC                                     | 48180 | III  |
| USB-060 | FC3169<br>7   | 18.97 | <i>G. max</i> | Landrace           | Costa<br>Rica |                           | 1946 | 31697                                            | 48105 | IV   |
| USB-061 | PI5459<br>1   | 16.91 | <i>G. max</i> | Landrace           | China         | Liaoning                  | 1921 | No. 31                                           | 48193 | III  |
| USB-062 | PI5460<br>8-1 | 17.98 | <i>G. max</i> | Landrace           | China         | Liaoning                  | ND   | ND                                               | 48240 | II   |
| USB-063 | PI5461<br>4   | 20.05 | <i>G. max</i> | Landrace           | China         | Jilin<br>Heilongji<br>ang | 1921 | No. 54                                           | 48197 | IV   |
| USB-064 | PI5461<br>5-1 | 16.48 | <i>G. max</i> | Landrace           | China         |                           | ND   | ND<br>Commo<br>n<br>Yellow<br>Variety            | 48143 | III  |
| USB-065 | PI5895<br>5   | 23.78 | <i>G. max</i> | Landrace           | China         | Shandon<br>g              | 1924 |                                                  | 48359 | IV   |
| USB-066 | PI6220<br>3   | 24.92 | <i>G. max</i> | Landrace           | China         | Hebei<br>Heilongji<br>ang | 1924 | 937                                              | 48318 | V    |
| USB-067 | PI6852<br>1-1 | 16.52 | <i>G. max</i> | Landrace           | China         |                           | 1926 | 205                                              | 48213 | III  |
| USB-068 | PI6860<br>4-1 | 25.49 | <i>G. max</i> | Landrace           | China         | ND                        | ND   | ND                                               | 48282 | III  |
| USB-069 | PI6873<br>2-1 | 17.00 | <i>G. max</i> | Landrace           | China         | Heilongji<br>ang          | 1926 | 204                                              | 48267 | III  |
| USB-070 | PI7008<br>0   | 19.48 | <i>G. max</i> | Landrace           | China         | Jilin                     | 1926 | 6908                                             | 48267 | III  |
| USB-071 | PI7046<br>6-3 | 26.43 | <i>G. max</i> | Landrace           | China         | Jilin                     | ND   | ND                                               | 48315 | IV   |
| USB-072 | PI7146<br>5   | 18.99 | <i>G. max</i> | Landrace           | China         | Jiangsu                   | 1927 | No. 33                                           | 48328 | V    |

|         |               |       |               |          |                 |                           |      |                                                  |       |      |
|---------|---------------|-------|---------------|----------|-----------------|---------------------------|------|--------------------------------------------------|-------|------|
| USB-073 | PI8083<br>7   | 17.21 | <i>G. max</i> | Landrace | Japan           | Akita                     | 1929 | Mejiro Kuro                                      | 48215 | IV   |
| USB-074 | PI8104<br>1   | 21.47 | <i>G. max</i> | Landrace | Japan           | Hokkaido                  | 1929 | Daizu                                            | 48272 | III  |
| USB-075 | PI8388<br>1   | 21.32 | <i>G. max</i> | Landrace | Korea           | kangwec<br>nto            | 1930 | Orukon Kuro                                      | 48311 | IV   |
| USB-076 | PI8394<br>2   | 17.56 | <i>G. max</i> | Landrace | Korea           | Kyonggi                   | 1930 | churyu                                           | 48295 | V    |
| USB-077 | PI8463<br>1   | 24.22 | <i>G. max</i> | Landrace | Korea           | Kyonggi                   | 1930 | S-56                                             | 48300 | III  |
| USB-078 | PI8463<br>7   | 17.90 | <i>G. max</i> | Landrace | Korea           | Kyonggi                   | ND   | ND                                               | 48253 | II   |
| USB-079 | PI8465<br>6   | 22.01 | <i>G. max</i> | Landrace | Korea           | Kyonggi                   | 1930 | S-81                                             | 48322 | III  |
| USB-080 | PI8494<br>6-2 | 19.34 | <i>G. max</i> | Landrace | Korea           | Pusan                     | 1929 | Kandok<br>on                                     | 48261 | IV   |
| USB-081 | PI8497<br>3   | 19.39 | <i>G. max</i> | Landrace | Japan           | ND                        | ND   | ND                                               | 48252 | III  |
| USB-084 | PI8690<br>4   | 21.04 | <i>G. max</i> | Landrace | Korea           | Chungch<br>eongbuk-<br>do | 1930 | Fukota                                           | 48222 | VI   |
| USB-085 | PI8697<br>2-2 | 26.74 | <i>G. max</i> | Landrace | Korea           | Cholla<br>Puk             | ND   | ND                                               | 48377 | IV   |
| USB-086 | PI8762<br>0   | 18.26 | <i>G. max</i> | Landrace | Korea           | Hamkys<br>ongpukto        | 1930 | Kurome<br>shoryu                                 | 48294 | III  |
| USB-087 | PI8831<br>3   | 17.92 | <i>G. max</i> | Landrace | China           | Heilongji<br>ang          | 1930 | 5702                                             | 48312 | II   |
| USB-088 | PI8846<br>8   | 21.97 | <i>G. max</i> | Landrace | China           | Liaoning                  | 1930 | Iganzu                                           | 48342 | II   |
| USB-089 | PI8900<br>5-5 | 16.90 | <i>G. max</i> | Landrace | China           | Liaoning                  | 1930 | 5950                                             | 48212 | II   |
| USB-090 | PI8977<br>5   | 18.36 | <i>G. max</i> | Landrace | China           | Tangsha<br>n              | 1930 | 7221                                             | 48234 | VI   |
| USB-091 | PI9047<br>9P  | 17.03 | <i>G. max</i> | Landrace | China           | ND                        | 1930 | 7413                                             | 48200 | IV   |
| USB-092 | PI9048<br>6   | 18.71 | <i>G. max</i> | Landrace | China           | Beijing                   | 1930 | 7533                                             | 48271 | III  |
| USB-093 | PI9110<br>0-3 | 18.15 | <i>G. max</i> | Landrace | China           | Jilin                     | ND   | ND                                               | 48221 | III  |
| USB-094 | PI9115<br>9-4 | 14.08 | <i>G. max</i> | Landrace | China           | Liaoning                  | ND   | ND                                               | 48207 | IV   |
| USB-095 | PI9116<br>0   | 22.21 | <i>G. max</i> | Landrace | China           | Liaoning                  | 1931 | 6615                                             | 48310 | III  |
| USB-096 | PI9265<br>1   | 20.55 | <i>G. max</i> | Landrace | China           | Jilin                     | 1931 | 7846                                             | 48198 | IV   |
| USB-097 | PI9415<br>9-3 | 19.29 | <i>G. max</i> | Landrace | Japan           | kagosim<br>a              | ND   | ND                                               | 48288 | IV   |
| USB-098 | PI9586<br>0   | 16.81 | <i>G. max</i> | Landrace | Korea           | Chungch<br>eongbuk-<br>do | 1932 | 155                                              | 48199 | VI   |
| USB-100 | PI1030<br>88  | 18.01 | <i>G. max</i> | Landrace | China           | Henan                     | 1933 | Ming<br>Chuan                                    | 48283 | III  |
| USB-101 | PI1234<br>40  | 18.62 | <i>G. max</i> | Landrace | Myanm<br>ar     | ND                        | 1937 | No. 2                                            | 48225 | VI   |
| USB-102 | PI1532<br>31  | 20.28 | <i>G. max</i> | Landrace | ND              | ND                        | 1946 | B-63                                             | 48289 | III  |
| USB-103 | PI1532<br>81  | 15.54 | <i>G. max</i> | Landrace | Belgium         | ND                        | 1946 | N-22                                             | 48245 | 0    |
| USB-104 | PI1541<br>89  | 18.17 | <i>G. max</i> | Landrace | Netherl<br>ands | ND                        | 1946 | No. 57                                           | 48216 | 0    |
| USB-106 | PI1599<br>25  | 16.00 | <i>G. max</i> | Landrace | Peru            | Lima                      | ND   | ND                                               | 48181 | VIII |
| USB-107 | PI1655<br>63  | 18.01 | <i>G. max</i> | Landrace | India           | Uttar<br>Pradesh          | 1948 | Bhart                                            | 48286 | VII  |
| USB-108 | PI1656<br>75  | 35.18 | <i>G. max</i> | Landrace | China           | Jiangsu                   | 1948 | Nanking<br>332<br>Large<br>Yellow<br>Soybea<br>n | 48870 | VII  |
| USB-109 | PI1714<br>28  | 16.75 | <i>G. max</i> | Landrace | China           | Beijing                   | 1948 | n                                                | 48228 | IV   |

|         |               |       |               |                 |              |                  |      |                    |       |     |
|---------|---------------|-------|---------------|-----------------|--------------|------------------|------|--------------------|-------|-----|
| USB-110 | PI1714<br>51  | 13.11 | <i>G. max</i> | Landrace        | Japan        | Kanagawa         | 1948 | Kosame             | 48178 | VII |
| USB-112 | PI1799<br>35  | 28.54 | <i>G. max</i> | Landrace        | India        | Himachal Pradesh | 1949 | Bhart Miko Saumon  | 48352 | VII |
| USB-113 | PI1898<br>73  | 17.99 | <i>G. max</i> | Landrace        | France       | ND               | 1950 |                    | 48272 | 0   |
| USB-115 | PI2093<br>33  | 17.21 | <i>G. max</i> | Landrace        | Japan        | Hokkaido         | 1953 | No. 3              | 48277 | VI  |
| USB-116 | PI2093<br>34  | 19.14 | <i>G. max</i> | Landrace        | Japan        | Hokkaido         | ND   | ND Kono-Kuradai zu | 48351 | III |
| USB-117 | PI2329<br>92  | 19.60 | <i>G. max</i> | Landrace        | Japan        | Saga             | 1956 |                    | 48351 | III |
| USB-119 | PI2536<br>61B | 28.02 | <i>G. max</i> | Landrace        | China        | ND               | 1958 | No. 12             | 48359 | III |
| USB-120 | PI2612<br>72C | 34.19 | <i>G. max</i> | Landrace        | Thailand     | Nan              | 1959 | Tua Nao            | 48429 | IX  |
| USB-121 | PI2744<br>53  | 24.42 | <i>G. max</i> | Landrace        | Japan        | Okinawa          | 1961 | ND                 | 48409 | X   |
| USB-122 | PI2912<br>94  | 21.25 | <i>G. max</i> | Landrace        | China        | Heilongjiang     | 1963 | ND                 | 48706 | I   |
| USB-123 | PI2913<br>09D | 26.30 | <i>G. max</i> | Landrace        | China        | Heilongjiang     | 1963 | ND                 | 48410 | II  |
| USB-124 | PI2913<br>10C | 24.15 | <i>G. max</i> | Landrace        | China        | Heilongjiang     | 1963 | ND                 | 48301 | II  |
| USB-125 | PI2975<br>05  | 32.88 | <i>G. max</i> | Landrace        | China        | ND               | 1964 | Czi ti No. 5       | 48256 | I   |
| USB-126 | PI2975<br>20  | 17.15 | <i>G. max</i> | Landrace        | Hungary      | ND               | 1964 | Iregi Univers al   | 48195 | 0   |
| USB-127 | PI3249<br>24  | 21.29 | <i>G. max</i> | Modern cultivar | South Africa | ND               | 1968 | Rhosa              | 48178 | V   |
| USB-128 | PI3424<br>34  | 16.73 | <i>G. max</i> | Landrace        | Japan        | Iwate            | 1967 | ND                 | 48348 | V   |
| USB-129 | PI3426<br>19A | 15.49 | <i>G. max</i> | Landrace        | Russia       | Primorye         | 1969 | ND                 | 48298 | 0   |
| USB-131 | PI3610<br>66B | 18.81 | <i>G. max</i> | Landrace        | Romania      | ND               | 1971 | F. 56-17           | 48160 | I   |
| USB-132 | PI3610<br>70  | 23.56 | <i>G. max</i> | Landrace        | Romania      | ND               | 1971 | Faur Kormov        | 48321 | 0   |
| USB-133 | PI3610<br>80  | 17.68 | <i>G. max</i> | Landrace        | Russia       | ND               | 1971 | aia 15             | 48325 | II  |
| USB-134 | PI3724<br>03B | 16.79 | <i>G. max</i> | Landrace        | Austria      | ND               | 1972 | Caloria Novosa     | 48260 | 0   |
| USB-135 | PI3724<br>18  | 17.13 | <i>G. max</i> | Landrace        | Serbia       | ND               | 1972 | Br. 4              | 48244 | I   |
| USB-136 | PI3742<br>07  | 16.37 | <i>G. max</i> | Landrace        | India        | Madhya Pradesh   | 1972 | N-9 Dnepro         | 48315 | X   |
| USB-139 | PI3786<br>58  | 16.86 | <i>G. max</i> | Landrace        | Ukraine      | Dnipropetrovsk   | 1973 | petrovsk 12 Habaro | 48190 | 0   |
| USB-140 | PI3786<br>63  | 24.86 | <i>G. max</i> | Landrace        | Russia       | ND               | 1973 | vskaja II          | 48393 | I   |
| USB-141 | PI3786<br>80E | 28.13 | <i>G. max</i> | Landrace        | Russia       | ND               | 1973 | VNIIMK             | 48387 | I   |
| USB-143 | PI3796<br>18  | 15.86 | <i>G. max</i> | Landrace        | Taiwan       | ND               | 1973 | 9186 TC 1          | 48254 | V   |
| USB-144 | PI3915<br>77  | 23.36 | <i>G. max</i> | Landrace        | China        | Jilin            | 1974 | Ch'a ye sheng tou  | 48396 | II  |
| USB-145 | PI3915<br>83  | 18.35 | <i>G. max</i> | Landrace        | China        | Jilin            | 1974 | Jilin No. 10       | 48264 | II  |

|         |               |       |               |          |             |                           |      |                             |       |      |
|---------|---------------|-------|---------------|----------|-------------|---------------------------|------|-----------------------------|-------|------|
| USB-146 | PI3986<br>33  | 17.50 | <i>G. max</i> | Landrace | Korea       | Chungch<br>eongbuk-<br>do | 1974 | KAS<br>390-17-<br>2         | 48289 | V    |
| USB-147 | PI3989<br>65  | 19.87 | <i>G. max</i> | Landrace | Korea       | ND                        | ND   | ND<br>Suj nii<br>hun        | 48313 | IV   |
| USB-148 | PI4041<br>87  | 30.97 | <i>G. max</i> | Landrace | China       | ND                        | 1975 | mao ju                      | 48271 | II   |
| USB-149 | PI4077<br>01  | 22.57 | <i>G. max</i> | Landrace | China       | ND                        | ND   | ND<br>Feng<br>shou          | 48242 | I    |
| USB-150 | PI4077<br>08A | 18.13 | <i>G. max</i> | Landrace | China       | Heilongji<br>ang          | 1975 | No. 10                      | 48235 | 0    |
| USB-151 | PI4077<br>42  | 15.79 | <i>G. max</i> | Landrace | China       | Shanxi                    | 1976 | 16                          | 48266 | V    |
| USB-152 | PI4167<br>51  | 22.92 | <i>G. max</i> | Landrace | Japan       | Tohoku                    | 1974 | A-B(D)                      | 48269 | I    |
| USB-153 | PI4168<br>38  | 13.96 | <i>G. max</i> | Landrace | Japan       | ND                        | ND   | ND                          | 48211 | V    |
| USB-154 | PI4172<br>15  | 16.51 | <i>G. max</i> | Landrace | Japan       | Kyushu                    | 1974 | Ooita<br>Aki<br>Daizu 2     | 48283 | VIII |
| USB-155 | PI4172<br>42  | 17.81 | <i>G. max</i> | Landrace | China       | ND                        | 1974 | Pekin<br>dai<br>seitou      | 48278 | II   |
| USB-156 | PI4173<br>45B | 17.97 | <i>G. max</i> | Landrace | China       | ND                        | 1974 | Shou<br>outou               | 48336 | IV   |
| USB-157 | PI4173<br>81  | 16.70 | <i>G. max</i> | Landrace | Japan       | Hokkaido                  | ND   | ND                          | 48231 | 0    |
| USB-158 | PI4174<br>79  | 21.49 | <i>G. max</i> | Landrace | Japan       | Tohoku                    | 1974 | Yougets<br>u                | 48367 | IV   |
| USB-159 | PI4175<br>00  | 17.76 | <i>G. max</i> | Landrace | Brazil      | ND                        | 1974 | Escura<br>A                 | 48246 | VIII |
| USB-160 | PI4175<br>29  | 16.49 | <i>G. max</i> | Landrace | German<br>y | ND                        | ND   | ND                          | 48229 | 0    |
| USB-161 | PI4175<br>81  | 18.21 | <i>G. max</i> | Landrace | USA         | ND                        | 1974 | H-<br>060072                | 48287 | V    |
| USB-162 | PI4239<br>26  | 23.41 | <i>G. max</i> | Landrace | Japan       | Nagano                    | 1976 | Tousan<br>72                | 48214 | IV   |
| USB-163 | PI4240<br>38B | 18.34 | <i>G. max</i> | Landrace | Korea       | South                     | 1976 | 74053                       | 48505 | V    |
| USB-166 | PI4241<br>95A | 16.93 | <i>G. max</i> | Landrace | Hungar<br>y | ND                        | 1978 | ISZ-3                       | 48227 | 0    |
| USB-167 | PI4305<br>95  | 18.72 | <i>G. max</i> | Landrace | China       | Beijing                   | 1978 | 58-16                       | 48235 | IV   |
| USB-168 | PI4366<br>84  | 16.76 | <i>G. max</i> | Landrace | China       | Liaoning                  | 1979 | Tie-feng<br>8               | 48242 | III  |
| USB-169 | PI4371<br>10A | 18.29 | <i>G. max</i> | Landrace | Russia      | Jwish                     | 1979 | VIR 244                     | 48338 | III  |
| USB-170 | PI4371<br>12A | 18.37 | <i>G. max</i> | Landrace | Russia      | Jwish                     | 1979 | VIR 249                     | 48304 | II   |
| USB-171 | PI4371<br>27A | 22.03 | <i>G. max</i> | Landrace | Georgia     | ND                        | 1979 | Imeretin<br>scaja           | 48269 | IV   |
| USB-173 | PI4371<br>60  | 26.44 | <i>G. max</i> | Landrace | Russia      | ND                        | 1979 | Krasno<br>darscaj<br>a 13   | 48270 | I    |
| USB-174 | PI4371<br>65A | 16.24 | <i>G. max</i> | Landrace | Russia      | Krasnod<br>ar             | 1979 | Toncost<br>ebel'naj<br>a 27 | 48234 | I    |
| USB-175 | PI4372<br>40  | 16.05 | <i>G. max</i> | Landrace | Moldov<br>a | ND                        | 1979 | CSchi<br>1069               | 48349 | 0    |
| USB-177 | PI4373<br>76A | 16.35 | <i>G. max</i> | Landrace | Russia      | Primorye                  | 1979 | Ussurij<br>scaja<br>308     | 48215 | I    |
| USB-178 | PI4374<br>85  | 23.29 | <i>G. max</i> | Landrace | Russia      | Primorye                  | 1979 | VIR<br>1048                 | 48317 | II   |
| USB-179 | PI4375<br>00A | 21.04 | <i>G. max</i> | Landrace | Russia      | Primorye                  | 1979 | VIR<br>3810                 | 48288 | I    |
| USB-180 | PI4375<br>05  | 21.45 | <i>G. max</i> | Landrace | Russia      | Primorye                  | 1979 | VIR<br>3853                 | 48379 | II   |

|         |        |       |               |          |          |          |      |                    |       |     |
|---------|--------|-------|---------------|----------|----------|----------|------|--------------------|-------|-----|
|         | PI4376 |       |               |          |          |          |      | Gun'-<br>tszu-lin' |       |     |
| USB-182 | 62     | 18.12 | <i>G. max</i> | Landrace | China    | ND       | 1979 | 658                | 48462 | II  |
|         | PI4376 |       |               |          |          |          |      | Phun-              |       |     |
| USB-183 | 85D    | 24.94 | <i>G. max</i> | Landrace | China    | ND       | 1979 | zhun               | 48284 | III |
|         | PI4376 |       |               |          |          |          |      |                    |       |     |
| USB-184 | 95A    | 33.45 | <i>G. max</i> | Landrace | China    | ND       | 1979 | S-185              | 48463 | I   |
|         | PI4377 |       |               |          |          |          |      | VIR                |       |     |
| USB-185 | 76     | 14.06 | <i>G. max</i> | Landrace | China    | ND       | 1979 | 1302               | 48240 | III |
|         | PI4377 |       |               |          |          |          |      | VIR                |       |     |
| USB-186 | 88A    | 15.08 | <i>G. max</i> | Landrace | China    | ND       | 1979 | 3018               | 48300 | II  |
|         | PI4377 |       |               |          |          |          |      | VIR                |       |     |
| USB-187 | 93     | 15.08 | <i>G. max</i> | Landrace | China    | ND       | 1979 | 3024               | 48296 | II  |
|         | PI4378 |       |               |          |          |          |      |                    |       |     |
| USB-188 | 14A    | 16.06 | <i>G. max</i> | Landrace | China    | ND       | 1979 | An'da              | 48339 | II  |
|         | PI4378 |       |               |          |          |          |      |                    |       |     |
| USB-189 | 38     | 16.28 | <i>G. max</i> | Landrace | Russia   | ND       | 1979 | DV-254             | 48212 | II  |
|         | PI4379 |       |               |          |          | Northeas |      | VIR                |       |     |
| USB-191 | 56B    | 22.98 | <i>G. max</i> | Landrace | China    | t        | 1979 | 1390               | 48420 | II  |
|         | PI4379 |       |               |          |          | Northeas |      | VIR                |       |     |
| USB-192 | 91B    | 19.44 | <i>G. max</i> | Landrace | China    | t        | 1979 | 1657               | 48328 | 0   |
|         | PI4380 |       |               |          |          | Northeas |      | VIR                |       |     |
| USB-193 | 19B    | 17.77 | <i>G. max</i> | Landrace | China    | t        | 1979 | 1883               | 48308 | II  |
|         | PI4380 |       |               |          |          | Northeas |      | VIR                |       |     |
| USB-195 | 83     | 15.39 | <i>G. max</i> | Landrace | China    | t        | 1979 | 2506               | 48229 | II  |
|         | PI4381 |       |               |          |          | Northeas |      | VIR                |       |     |
| USB-196 | 12B    | 16.26 | <i>G. max</i> | Landrace | China    | t        | 1979 | 2623               | 48248 | III |
|         | PI4382 |       |               |          |          | Northeas |      | VIR                |       |     |
| USB-198 | 30A    | 17.94 | <i>G. max</i> | Landrace | China    | t        | 1979 | 4521               | 48298 | I   |
|         | PI4382 |       |               |          |          | Northeas |      | VIR                |       |     |
| USB-199 | 39B    | 15.49 | <i>G. max</i> | Landrace | China    | t        | 1979 | 4536               | 48269 | I   |
|         | PI4383 |       |               |          |          |          |      | VIR                |       |     |
| USB-201 | 09     | 20.37 | <i>G. max</i> | Landrace | China    | ND       | 1979 | 3017               | 48365 | I   |
|         | PI4383 |       |               |          |          |          |      | Grignon            |       |     |
| USB-202 | 23     | 16.23 | <i>G. max</i> | Landrace | France   | ND       | 1979 | 53-F-3             | 48192 | I   |
|         | PI4383 |       |               |          |          |          |      | Sao                |       |     |
| USB-203 | 36     | 17.25 | <i>G. max</i> | Landrace | Algeria  | ND       | 1979 | 208                | 48211 | 0   |
|         | PI4383 |       |               |          | Australi |          |      | 35S.27             |       |     |
| USB-204 | 47     | 18.40 | <i>G. max</i> | Landrace | a        | ND       | 1979 | 7                  | 48286 | VII |
|         | PI4384 |       |               |          |          |          |      |                    |       |     |
| USB-206 | 96B    | 16.01 | <i>G. max</i> | Landrace | USA      | ND       | ND   | ND                 | 48256 | III |
|         | PI4384 |       |               |          |          |          |      |                    |       |     |
| USB-207 | 96C    | 17.06 | <i>G. max</i> | Landrace | China    | ND       | 1979 | VIR 195            | 48246 | IV  |
|         | PI4385 |       |               |          |          |          |      |                    |       |     |
| USB-208 | 00     | 17.04 | <i>G. max</i> | Landrace | USA      | ND       | 1979 | Virginia           | 48288 | III |
|         | PI4458 |       |               |          | German   |          |      | Wolfsth            |       |     |
| USB-209 | 24A    | 18.15 | <i>G. max</i> | Landrace | y        | ND       | 1925 | ale                | 48306 | 0   |
|         | PI4585 |       |               |          |          |          |      | Da Bai             |       |     |
| USB-210 | 05     | 18.15 | <i>G. max</i> | Landrace | China    | Liaoning | 1981 | mei                | 48276 | II  |
|         | PI4585 |       |               |          |          |          |      | Ji Ti              |       |     |
| USB-212 | 10     | 17.04 | <i>G. max</i> | Landrace | China    | Liaoning | 1981 | No. 1              | 48251 | III |
|         |        |       |               |          |          |          |      | Jou                |       |     |
|         | PI4648 |       |               |          |          |          |      | Nong               |       |     |
| USB-213 | 96     | 16.76 | <i>G. max</i> | Landrace | China    | Jilin    | 1981 | No. 5              | 48261 | I   |
|         | PI4589 |       |               |          |          |          |      |                    |       |     |
| USB-214 | 12     | 19.57 | <i>G. max</i> | Landrace | China    | ND       | ND   | ND                 | 48230 | IV  |
|         | PI4649 |       |               |          |          |          |      | Tie Fen            |       |     |
| USB-215 | 23     | 19.43 | <i>G. max</i> | Landrace | China    | Liaoning | 1981 | 16                 | 48294 | I   |
|         | PI4673 |       |               |          |          |          |      | Zi-hua-            |       |     |
| USB-216 | 47     | 15.81 | <i>G. max</i> | Landrace | China    | Jilin    | 1982 | cuo-zi             | 48222 | II  |
|         |        |       |               |          |          |          |      | Qi                 |       |     |
|         | PI4684 |       |               |          |          |          |      | Huang              |       |     |
| USB-217 | 08B    | 16.32 | <i>G. max</i> | Landrace | China    | Jilin    | 1982 | No. 1              | 48230 | III |
|         | PI4758 |       |               |          |          |          |      |                    |       |     |
| USB-218 | 20     | 18.14 | <i>G. max</i> | Landrace | China    | Xinjiang | 1982 | ND                 | 48288 | II  |
|         | PI4763 |       |               |          |          |          |      | VIR                |       |     |
| USB-220 | 52B    | 18.34 | <i>G. max</i> | Landrace | Kyrgyzst | ND       | 1981 | 7081               | 48304 | II  |
|         | PI4797 |       |               |          |          |          |      | Silihuan           |       |     |
| USB-221 | 35     | 14.54 | <i>G. max</i> | Landrace | China    | Jilin    | 1983 | g                  | 48222 | III |
|         | PI4907 |       |               |          |          |          |      | Dawudo             |       |     |
| USB-222 | 66     | 15.50 | <i>G. max</i> | Landrace | China    | Hebei    | 1984 | u                  | 48267 | III |

|         |               |       |               |                    |        |                  |      |                         |       |     |
|---------|---------------|-------|---------------|--------------------|--------|------------------|------|-------------------------|-------|-----|
| USB-223 | PI4950<br>20  | 18.84 | <i>G. max</i> | Landrace           | China  | Beijing          | 1985 | Xu dou<br>2             | 48323 | IV  |
| USB-224 | PI4979<br>53  | 14.55 | <i>G. max</i> | Landrace           | India  | Bihar            | 1980 | I.C. 192<br>PLSO        | 48284 | X   |
| USB-226 | PI4979<br>67  | 19.25 | <i>G. max</i> | Landrace           | India  | Jammu            | 1980 | 96                      | 48368 | VII |
| USB-227 | PI5042<br>88  | 15.21 | <i>G. max</i> | Landrace           | Japan  | Iwate            | 1986 | S                       | 48421 | V   |
| USB-228 | PI5069<br>33  | 16.39 | <i>G. max</i> | Landrace           | Japan  | ND               | ND   | ND                      | 48282 | IV  |
| USB-229 | PI5069<br>42  | 15.71 | <i>G. max</i> | Landrace           | Japan  | Tohoku           | 1987 | Koushu<br>rei 235       | 48252 | II  |
| USB-230 | PI5070<br>17  | 34.97 | <i>G. max</i> | Landrace           | Japan  | ND               | ND   | ND                      | 48441 | VII |
| USB-232 | PI5070<br>88  | 19.64 | <i>G. max</i> | Landrace           | Japan  | Kanto            | 1987 | Nattou<br>Kotsu<br>u    | 48250 | VI  |
| USB-233 | PI5072<br>93B | 14.81 | <i>G. max</i> | Landrace           | Japan  | ND               | ND   | ND                      | 48171 | III |
| USB-234 | PI5074<br>58  | 15.15 | <i>G. max</i> | Landrace           | Japan  | Kanto            | 1987 | Tousan<br>kei BL<br>521 | 48227 | IV  |
| USB-235 | PI5074<br>67  | 19.65 | <i>G. max</i> | Landrace           | Japan  | Kanto            | 1987 | Tousan<br>kei F<br>764  | 48215 | IV  |
| USB-236 | PI5074<br>71  | 16.73 | <i>G. max</i> | Landrace           | Japan  | Kanto            | 1987 | Tousan<br>kei na<br>16  | 48290 | III |
| USB-238 | PI5074<br>80  | 17.00 | <i>G. max</i> | Landrace           | Japan  | Kanto            | 1987 | Tousan<br>kei YL<br>24  | 48164 | IV  |
| USB-240 | PI5146<br>71  | 15.53 | <i>G. max</i> | Landrace           | China  | Heilongji<br>ang | 1987 | Feng<br>shou<br>No. 7   | 48231 | 0   |
| USB-241 | PI5187<br>27  | 17.55 | <i>G. max</i> | Landrace           | China  | Guangdc<br>ng    | 1988 | Ju<br>huang             | 48277 | VI  |
| USB-242 | PI5324<br>63B | 15.91 | <i>G. max</i> | Landrace           | China  | Hebei            | 1989 | He bei<br>No. 1         | 48248 | III |
| USB-245 | PI5383<br>86A | 16.04 | <i>G. max</i> | Landrace           | China  | Hebei            | 1990 | 1886                    | 48339 | III |
| USB-246 | PI5405<br>52  | 14.04 | <i>G. max</i> | Modern<br>cultivar | USA    | Ohio             | 1987 | Hoyt                    | 48157 | II  |
| USB-248 | PI5429<br>72  | 16.81 | <i>G. max</i> | Modern<br>cultivar | USA    | Illinois         | 1990 | H7190                   | 48130 | VII |
| USB-249 | PI5481<br>62  | 16.47 | <i>G. max</i> | Modern<br>cultivar | USA    | Illinois         | 1954 | T48                     | 48258 | IV  |
| USB-250 | PI5481<br>69  | 14.62 | <i>G. max</i> | Landrace           | USA    | Illinois         | 1954 | T117                    | 48230 | IV  |
| USB-251 | PI5481<br>78  | 28.81 | <i>G. max</i> | Landrace           | USA    | Illinois         | 1954 | T145                    | 48308 | III |
| USB-252 | PI5481<br>98  | 15.92 | <i>G. max</i> | Landrace           | USA    | Illinois         | 1957 | T209                    | 48310 | III |
| USB-253 | PI5482<br>00  | 17.43 | <i>G. max</i> | Landrace           | USA    | Illinois         | 1957 | T211H                   | 48282 | IV  |
| USB-254 | PI5482<br>56  | 17.95 | <i>G. max</i> | Modern<br>cultivar | USA    | Mississip<br>pi  | 1985 | T279                    | 48206 | VII |
| USB-255 | PI5483<br>36  | 15.23 | <i>G. max</i> | Old cultivar       | Russia | ND               | 1952 | Habaro                  | 48281 | I   |
| USB-256 | PI5483<br>56  | 16.87 | <i>G. max</i> | Old cultivar       | Korea  | Phyeong<br>yang  | 1955 | Kanro                   | 48231 | II  |
| USB-257 | PI5483<br>59  | 17.50 | <i>G. max</i> | Old cultivar       | China  | Beijing          | 1950 | Kingwa                  | 48271 | IV  |
| USB-258 | PI5483<br>83  | 15.79 | <i>G. max</i> | Old cultivar       | China  | Heilongji<br>ang | 1915 | Mansoy                  | 48165 | III |
| USB-259 | PI5484<br>00  | 16.04 | <i>G. max</i> | Old cultivar       | China  | Heilongji<br>ang | 1949 | Patoka                  | 48271 | IV  |
| USB-260 | PI5484<br>11  | 12.63 | <i>G. max</i> | Old cultivar       | China  | ND               | 1949 | Seneca                  | 48152 | II  |

|         |               |       |               |                    |               |                   |      |                                       |       |      |
|---------|---------------|-------|---------------|--------------------|---------------|-------------------|------|---------------------------------------|-------|------|
| USB-261 | PI5484<br>27  | 15.64 | <i>G. max</i> | Old cultivar       | China         | Liaoning          | 1950 | Wilson                                | 48257 | IV   |
| USB-262 | PI5484<br>73  | 18.47 | <i>G. max</i> | Old cultivar       | China         | Jiangsu           | 1991 | Monetta                               | 48263 | VII  |
| USB-263 | PI5484<br>74  | 16.42 | <i>G. max</i> | Old cultivar       | Korea         | Hwangh<br>aipukto | 1991 | Nanda                                 | 48239 | VIII |
| USB-264 | PI5484<br>79  | 16.65 | <i>G. max</i> | Old cultivar       | Taiwan        | ND                | 1991 | Otootan                               | 48216 | VIII |
| USB-265 | PI5485<br>21  | 19.42 | <i>G. max</i> | Modern<br>cultivar | USA           | Iowa              | 1982 | BSR<br>201                            | 48260 | II   |
| USB-266 | PI5485<br>24  | 17.42 | <i>G. max</i> | Modern<br>cultivar | USA           | Iowa              | 1979 | Weber                                 | 48319 | I    |
| USB-268 | PI5485<br>71  | 17.47 | <i>G. max</i> | Modern<br>cultivar | Canada        | Ontario           | 1973 | Harlon                                | 48212 | I    |
| USB-269 | PI5485<br>72  | 17.37 | <i>G. max</i> | Modern<br>cultivar | Canada        | Ontario           | 1950 | Harly                                 | 48111 | I    |
| USB-270 | PI5485<br>82  | 15.33 | <i>G. max</i> | Modern<br>cultivar | USA           | Minnesot<br>a     | 1978 | McCall                                | 48178 | 0    |
| USB-271 | PI5486<br>19  | 55.26 | <i>G. max</i> | Modern<br>cultivar | USA           | kansas            | 1982 | Sparks                                | 48377 | IV   |
| USB-272 | PI5486<br>33  | 22.24 | <i>G. max</i> | Modern<br>cultivar | USA           | Maryland          | 1970 | Wye                                   | 48266 | IV   |
| USB-274 | PI5486<br>96  | 19.37 | <i>G. max</i> | Modern<br>cultivar | USA           | Arkansa<br>s      | 1979 | Dortchs<br>oy 67                      | 48273 | V    |
| USB-276 | PI5489<br>78  | 16.37 | <i>G. max</i> | Modern<br>cultivar | USA           | Texas             | 1979 | Gail<br>ZYD                           | 48185 | VI   |
| USB-277 | PI5490<br>17  | 19.69 | <i>G. max</i> | Landrace           | China         | Ningxia           | 1990 | 3938                                  | 48401 | IV   |
| USB-278 | PI5490<br>21A | 19.65 | <i>G. max</i> | Landrace           | China         | Liaoning          | 1990 | Na hei<br>dou                         | 48455 | III  |
| USB-279 | PI5490<br>28  | 18.40 | <i>G. max</i> | Landrace           | China         | Liaoning          | 1990 | Feng da<br>li                         | 48278 | V    |
| USB-281 | PI5490<br>40  | 16.09 | <i>G. max</i> | Landrace           | China         | Liaoning          | 1990 | ZYD<br>2704                           | 48441 | IV   |
| USB-282 | PI5565<br>11  | 14.60 | <i>G. max</i> | Modern<br>cultivar | USA           | ND                | 1977 | A3127                                 | 48164 | III  |
| USB-283 | PI5613<br>18A | 18.17 | <i>G. max</i> | Landrace           | China         | Beijing           | 1992 | Hui nan<br>bai hua<br>xiao hei<br>dou | 48236 | I    |
| USB-284 | PI5613<br>71  | 17.72 | <i>G. max</i> | Landrace           | China         | Shanxi            | 1992 | Fen dou<br>15                         | 48279 | IV   |
| USB-285 | PI5613<br>87  | 12.08 | <i>G. max</i> | Landrace           | Japan         | ND                | 1992 | Kosuzu<br>Okura                       | 48112 | V    |
| USB-286 | PI5613<br>89B | 19.90 | <i>G. max</i> | Landrace           | Japan         | Natto             | 1992 | Natto                                 | 48333 | 0    |
| USB-287 | PI5617<br>01  | 17.45 | <i>G. max</i> | Modern<br>cultivar | USA           | Georgia           | 1992 | G88-<br>20092                         | 48135 | IV   |
| USB-290 | PI5670<br>74B | 16.63 | <i>G. max</i> | Landrace           | Indones<br>ia | east java         | 1993 | MARIF<br>2672                         | 48315 | IX   |
| USB-291 | PI5671<br>73  | 17.16 | <i>G. max</i> | Landrace           | China         | Heilongji<br>ang  | 1993 | Hei he<br>51                          | 48223 | 0    |
| USB-293 | PI5672<br>25  | 18.24 | <i>G. max</i> | Landrace           | Moldov<br>a   | ND                | 1993 | Kisinev<br>skaja<br>90                | 48276 | 0    |
| USB-294 | PI5672<br>26  | 14.73 | <i>G. max</i> | Landrace           | Russia        | ND                | 1993 | Har'kov<br>skaja<br>Zernouk<br>osnaja | 48261 | 0    |

|         |               |       |               |          |       |              |      |                                                                                                |       |      |
|---------|---------------|-------|---------------|----------|-------|--------------|------|------------------------------------------------------------------------------------------------|-------|------|
| USB-295 | PI5672<br>31  | 14.55 | <i>G. max</i> | Landrace | China | Sichuan      | 1990 | WJK-<br>PRC-46<br>W6                                                                           | 48252 | VIII |
| USB-296 | PI5672<br>38  | 14.85 | <i>G. max</i> | Landrace | China | Yunnan       | 1990 | 6210                                                                                           | 48296 | ND   |
| USB-297 | PI5676<br>26A | 16.18 | <i>G. max</i> | Landrace | China | Henan        | ND   | ND<br>Hei<br>huang<br>dou<br>Niu<br>mao<br>huang<br>dou<br>Yang<br>yan<br>qing<br>dou          | 48272 | IV   |
| USB-298 | PI5673<br>07  | 15.63 | <i>G. max</i> | Landrace | China | Gansu        | 1993 |                                                                                                | 48236 | IV   |
| USB-301 | PI5673<br>46  | 14.85 | <i>G. max</i> | Landrace | China | Gansu        | 1993 |                                                                                                | 48327 | V    |
| USB-302 | PI5673<br>52A | 15.85 | <i>G. max</i> | Landrace | China | Gansu        | 1993 |                                                                                                | 48296 | IV   |
| USB-303 | PI5673<br>53  | 17.10 | <i>G. max</i> | Landrace | China | Gansu        | ND   | ND<br>Lu fang<br>huang<br>dou<br>Xiao<br>dou                                                   | 48245 | IV   |
| USB-304 | PI5673<br>61  | 16.48 | <i>G. max</i> | Landrace | China | Ningxia      | 1993 |                                                                                                | 48326 | III  |
| USB-306 | PI5674<br>07  | 46.81 | <i>G. max</i> | Landrace | China | Shanxi       | 1993 |                                                                                                | 48430 | V    |
| USB-307 | PI5674<br>08  | 26.16 | <i>G. max</i> | Landrace | China | Shanxi       | 1993 | Xiao jin<br>huang<br>Yang<br>huang<br>dou<br>Bai da<br>huang<br>dou                            | 48376 | V    |
| USB-308 | PI5674<br>10B | 31.74 | <i>G. max</i> | Landrace | China | Shanxi       | 1993 |                                                                                                | 48419 | VII  |
| USB-309 | PI5674<br>15A | 30.53 | <i>G. max</i> | Landrace | China | Shanxi       | 1993 |                                                                                                | 48393 | IV   |
| USB-310 | PI5674<br>16  | 28.70 | <i>G. max</i> | Landrace | China | Shanxi       | 1993 | Bai dou<br>Bai hei<br>dou                                                                      | 48510 | IV   |
| USB-311 | PI5674<br>18A | 28.63 | <i>G. max</i> | Landrace | China | Shanxi       | 1993 | Bai ji<br>yao                                                                                  | 48363 | II   |
| USB-312 | PI5674<br>28  | 32.24 | <i>G. max</i> | Landrace | China | Shanxi       | 1993 | Hei hei<br>dou                                                                                 | 48480 | IV   |
| USB-313 | PI5674<br>35B | 30.74 | <i>G. max</i> | Landrace | China | Shanxi       | 1993 |                                                                                                | 48382 | III  |
| USB-314 | PI5674<br>39  | 28.23 | <i>G. max</i> | Landrace | China | Shanxi       | 1993 | Hong jia<br>huang<br>dou<br>Di liu<br>huang<br>dou No.                                         | 48395 | V    |
| USB-315 | PI5674<br>88A | 17.83 | <i>G. max</i> | Landrace | China | Hebei        | 1993 | 2<br>Er da li<br>huang<br>dou<br>Cao<br>qing<br>huang<br>dou<br>Dai ye<br>xiao<br>huang<br>dou | 48369 | IV   |
| USB-316 | PI5674<br>89A | 33.83 | <i>G. max</i> | Landrace | China | Hebei        | 1993 |                                                                                                | 48482 | IV   |
| USB-317 | PI5675<br>25  | 32.12 | <i>G. max</i> | Landrace | China | Shandon<br>g | 1993 |                                                                                                | 48313 | II   |
| USB-318 | PI5675<br>32  | 16.40 | <i>G. max</i> | Landrace | China | Shandon<br>g | 1993 |                                                                                                | 48348 | IV   |
| USB-319 | PI5675<br>48  | 33.28 | <i>G. max</i> | Landrace | China | Shandon<br>g | 1993 | Hua li<br>hu zi<br>PIng<br>ding<br>huang<br>Yu<br>cheng<br>xiao tie<br>jiao<br>huang           | 48611 | IV   |
| USB-320 | PI5675<br>76  | 18.37 | <i>G. max</i> | Landrace | China | Shandon<br>g | 1993 |                                                                                                | 48325 | III  |
| USB-322 | PI5676<br>75  | 18.12 | <i>G. max</i> | Landrace | China | Henan        | 1993 |                                                                                                | 48351 | IV   |

|         |               |       |               |                    |        |                  |      |                                            |       |      |
|---------|---------------|-------|---------------|--------------------|--------|------------------|------|--------------------------------------------|-------|------|
| USB-323 | PI5676<br>85  | 17.07 | <i>G. max</i> | Landrace           | China  | Henan            | 1993 | Zhong<br>mou tie<br>jiao er<br>cao         | 48365 | IV   |
| USB-324 | PI5676<br>98A | 15.23 | <i>G. max</i> | Landrace           | China  | Anhui            | 1993 | Fu yang<br>(17)                            | 48354 | IV   |
| USB-325 | PI5677<br>26  | 16.23 | <i>G. max</i> | Landrace           | China  | Anhui            | ND   | ND                                         | 48303 | IV   |
| USB-326 | PI5677<br>46  | 17.15 | <i>G. max</i> | Landrace           | China  | Jiangsu          | 1993 | Pei xian<br>da bai<br>jiao<br>Tong<br>shan | 48302 | IV   |
| USB-327 | PI5677<br>80B | 16.97 | <i>G. max</i> | Landrace           | China  | Jiangsu          | 1993 | zheng ji<br>dou                            | 48312 | IV   |
| USB-328 | PI5677<br>82  | 17.73 | <i>G. max</i> | Modern<br>cultivar | Canada | Ontario          | 1993 | OAC<br>Dorado                              | 48234 | I    |
| USB-330 | PI5744<br>77  | 17.49 | <i>G. max</i> | Landrace           | China  | Shanxi           | 1993 | Fen dou<br>31                              | 48207 | IV   |
| USB-331 | PI5783<br>75B | 18.00 | <i>G. max</i> | Landrace           | China  | ND               | 1994 | Aan tu<br>dang di<br>hei dou               | 48294 | I    |
| USB-332 | PI5784<br>12  | 18.95 | <i>G. max</i> | Landrace           | China  | ND               | 1994 | Gong<br>jiao<br>6308-1'                    | 48224 | II   |
| USB-333 | PI5784<br>93  | 18.79 | <i>G. max</i> | Landrace           | China  | ND               | 1994 | Huang<br>bao zhu                           | 48293 | II   |
| USB-334 | PI5784<br>99A | 15.79 | <i>G. max</i> | Landrace           | China  | ND               | 1994 | Lu yue<br>bai                              | 48151 | II   |
| USB-335 | PI5785<br>03  | 35.04 | <i>G. max</i> | Landrace           | China  | ND               | 1994 | Tie jia si<br>li huang                     | 48333 | I    |
| USB-336 | PI5785<br>04  | 17.54 | <i>G. max</i> | Landrace           | China  | ND               | 1994 | Xiang<br>dou No.<br>3                      | 48317 | II   |
| USB-338 | PI5875<br>88A | 17.14 | <i>G. max</i> | Landrace           | China  | Jiangsu          | 1996 | Tai xing<br>niu mao<br>huang<br>yi         | 48395 | IV   |
| USB-339 | PI5875<br>88B | 16.33 | <i>G. max</i> | Landrace           | China  | Jiangsu          | 1996 | Tai xing<br>niu mao<br>huang<br>yi         | 48232 | V    |
| USB-341 | PI5877<br>12B | 17.14 | <i>G. max</i> | Landrace           | China  | Hubei            | 1996 | E dou<br>No. 1                             | 48271 | V    |
| USB-342 | PI5878<br>04  | 16.51 | <i>G. max</i> | Landrace           | China  | Hubei            | 1994 | Jing<br>789                                | 48281 | IV   |
| USB-343 | PI5878<br>11A | 16.10 | <i>G. max</i> | Landrace           | China  | Hubei            | 1994 | ZDD00<br>5777                              | 48260 | VIII |
| USB-345 | PI5929<br>37  | 18.23 | <i>G. max</i> | Landrace           | China  | ND               | 1994 | Jin dou<br>14                              | 48291 | IV   |
| USB-346 | PI5929<br>40  | 18.36 | <i>G. max</i> | Landrace           | China  | ND               | 1994 | Jin dou<br>17                              | 48307 | IV   |
| USB-347 | PI5929<br>52  | 15.09 | <i>G. max</i> | Landrace           | China  | ND               | 1994 | Zheng<br>77249                             | 48293 | III  |
| USB-348 | PI5929<br>60  | 16.45 | <i>G. max</i> | Landrace           | China  | Heilongji<br>ang | 1995 | Dong<br>nong 38                            | 48159 | I    |
| USB-351 | PI5939<br>53  | 15.48 | <i>G. max</i> | Landrace           | China  | ND               | 1995 | Sui<br>nong<br>No. 10                      | 48200 | I    |
| USB-353 | PI5941<br>70B | 19.04 | <i>G. max</i> | Landrace           | Japan  | Akita            | 1996 | Geden<br>shirazu                           | 48335 | I    |

|         |               |       |               |                    |       |                   |      |                                   |       |      |
|---------|---------------|-------|---------------|--------------------|-------|-------------------|------|-----------------------------------|-------|------|
| USB-354 | PI5944<br>56A | 28.51 | <i>G. max</i> | Landrace           | China | Sichuan           | 1996 | Xiao jin<br>huang                 | 48375 | III  |
| USB-357 | PI5948<br>80  | 15.66 | <i>G. max</i> | Landrace           | China | Yunnan            | 1996 | Song zi<br>dou                    | 48265 | V    |
| USB-358 | PI5949<br>22  | 16.35 | <i>G. max</i> | Modern<br>cultivar | USA   | North<br>Carolina | 1996 | Graham<br>Zhe<br>chun             | 48073 | V    |
| USB-361 | PI5974<br>64  | 27.04 | <i>G. max</i> | Landrace           | China | Zhejiang          | 1997 | No. 3<br>Zheye                    | 48347 | II   |
| USB-362 | PI5974<br>71A | 30.74 | <i>G. max</i> | Landrace           | China | Zhejiang          | 1996 | 29                                | 48595 | VII  |
| USB-363 | PI5974<br>78B | 17.69 | <i>G. max</i> | Modern<br>cultivar | Korea | South             | 1997 | Paldalk<br>ong                    | 48196 | III  |
| USB-364 | PI5983<br>58  | 18.45 | <i>G. max</i> | Modern<br>cultivar | USA   | Tenness<br>ee     | 1997 | TN 5-95                           | 48127 | V    |
| USB-366 | PI6025<br>02B | 16.25 | <i>G. max</i> | Landrace           | China | ND                | 1997 | Xiong<br>yue xiao<br>huang<br>dou | 48209 | IV   |
| USB-367 | PI6029<br>93  | 14.89 | <i>G. max</i> | Landrace           | China | Jiangsu           | 1997 | PI xian<br>ruan<br>tiao zhi<br>GL | 48211 | IV   |
| USB-368 | PI6031<br>62  | 15.08 | <i>G. max</i> | Landrace           | Korea | ND                | 1997 | 2631<br>/96                       | 48231 | IV   |
| USB-369 | PI6032<br>90  | 17.35 | <i>G. max</i> | Landrace           | China | ND                | 1998 | Zao shu<br>18                     | 48324 | I    |
| USB-370 | PI6033<br>45  | 17.07 | <i>G. max</i> | Landrace           | China | Jilin             | 1998 | ZDD00<br>403                      | 48162 | II   |
| USB-371 | PI6033<br>89  | 15.70 | <i>G. max</i> | Landrace           | China | Liaoning          | 1998 | Huang<br>ke                       | 48139 | II   |
| USB-372 | PI6033<br>97  | 16.28 | <i>G. max</i> | Landrace           | China | Liaoning          | 1998 | Hei qi<br>huang<br>da dou         | 48274 | IV   |
| USB-373 | PI6033<br>99  | 16.96 | <i>G. max</i> | Landrace           | China | Liaoning          | 1998 | Xiao bai<br>qi                    | 48239 | II   |
| USB-374 | PI6034<br>63  | 17.98 | <i>G. max</i> | Landrace           | China | Shandon<br>g      | 1998 | Dong jie<br>No. 1                 | 48260 | II   |
| USB-375 | PI6034<br>88  | 18.04 | <i>G. max</i> | Landrace           | China | Shandon<br>g      | 1998 | ZDD19<br>294                      | 48267 | III  |
| USB-376 | PI6034<br>92  | 16.75 | <i>G. max</i> | Landrace           | China | Shandon<br>g      | 1998 | Qi hei<br>dou                     | 48268 | IV   |
| USB-377 | PI6034<br>94  | 16.68 | <i>G. max</i> | Landrace           | China | Shandon<br>g      | 1998 | Hai dou<br>zi                     | 48224 | IV   |
| USB-378 | PI6034<br>95B | 18.35 | <i>G. max</i> | Landrace           | China | ND                | 1998 | Hong<br>mi lan<br>dou zi          | 48286 | V    |
| USB-381 | PI6035<br>26  | 17.20 | <i>G. max</i> | Landrace           | China | Shanxi            | 1998 | Hei you<br>dou                    | 48304 | IV   |
| USB-382 | PI6035<br>49  | 18.34 | <i>G. max</i> | Landrace           | China | Shanxi            | 1998 | Mei dou                           | 48811 | III  |
| USB-383 | PI6035<br>55  | 14.97 | <i>G. max</i> | Landrace           | China | ND                | ND   | ND                                | 48258 | IV   |
| USB-384 | PI6035<br>56  | 20.04 | <i>G. max</i> | Landrace           | China | ND                | ND   | ND                                | 48416 | III  |
| USB-385 | PI6035<br>59  | 15.02 | <i>G. max</i> | Landrace           | China | ND                | ND   | ND                                | 48304 | IV   |
| USB-386 | PI6036<br>75  | 17.03 | <i>G. max</i> | Landrace           | China | Jiangsu           | 1998 | Huai yin<br>gua dou<br>jia        | 48281 | III  |
| USB-387 | PI6036<br>98J | 17.39 | <i>G. max</i> | Landrace           | China | ND                | ND   | ND                                | 48261 | 0    |
| USB-388 | PI6037<br>22  | 19.64 | <i>G. max</i> | Landrace           | China | Sichuan           | 1998 | Nan<br>chong<br>ba yue<br>huang   | 48277 | VIII |

|         |               |       |               |                 |             |              |      |                                   |       |      |
|---------|---------------|-------|---------------|-----------------|-------------|--------------|------|-----------------------------------|-------|------|
| USB-389 | PI6057<br>65B | 17.85 | <i>G. max</i> | Landrace        | China       | Zhejiang     | ND   | ND                                | 48303 | II   |
| USB-390 | PI6063<br>74  | 18.47 | <i>G. max</i> | Landrace        | Vietnam     | ND           | 1998 | Cao bang 8<br>Zhong huong         | 48328 | IV   |
| USB-392 | PI6127<br>30  | 19.32 | <i>G. max</i> | Landrace        | China       | ND           | 1996 | No. 10                            | 48247 | II   |
| USB-393 | PI6127<br>54  | 17.83 | <i>G. max</i> | Modern cultivar | China       | ND           | 1999 | ZY 645<br>MG/BR-46<br>(Conquista) | 48366 | I    |
| USB-395 | PI6288<br>12  | 20.19 | <i>G. max</i> | Modern cultivar | Brazil      | ND           | 2001 |                                   | 48040 | V    |
| USB-396 | PI6289<br>13  | 17.01 | <i>G. max</i> | Modern cultivar | Brazil      | ND           | 2001 | BR-30<br>La                       | 48244 | VI   |
| USB-398 | PI6289<br>63  | 18.63 | <i>G. max</i> | Modern cultivar | Brazil      | ND           | 2001 | Suprema                           | 48198 | VII  |
| USB-399 | PI6311<br>23  | 19.90 | <i>G. max</i> | Modern cultivar | USA         | Maryland     | 2002 | TW98-1                            | 48153 | V    |
| USB-400 | PI6324<br>18  | 17.09 | <i>G. max</i> | Modern cultivar | USA         | Maryland     | 2003 | Tara                              | 48164 | V    |
| USB-401 | PI6326<br>50  | 16.92 | <i>G. max</i> | Landrace        | Vietnam     | ND           | 2003 | DT 22                             | 48239 | V    |
| USB-402 | PI6395<br>28B | 16.61 | <i>G. max</i> | Landrace        | Russia      | Primorye     | ND   | ND<br>VIR                         | 48247 | II   |
| USB-403 | PI6395<br>43  | 18.43 | <i>G. max</i> | Landrace        | Russia      | Primorye     | 2005 | 3715                              | 48348 | II   |
| USB-404 | PI6395<br>50E | 16.09 | <i>G. max</i> | Landrace        | Moldova     | ND           | ND   | ND<br>VYTKA                       | 48271 | II   |
| USB-405 | PI6395<br>59B | 20.33 | <i>G. max</i> | Landrace        | Ukraine     | ND           | 2005 | 2                                 | 48398 | II   |
| USB-407 | PI6395<br>70  | 19.58 | <i>G. max</i> | Landrace        | Philippines | ND           | ND   | ND<br>Max                         | 48274 | V    |
| USB-409 | PI3226<br>92  | 56.83 | <i>G. max</i> | Landrace        | Australia   | ND           | 1967 | C.P115<br>9A8                     | 48500 | IX   |
| USB-411 | PI5677<br>88  | 42.51 | <i>G. max</i> | Modern cultivar | USA         | Louisiana    | 1993 | Bienville<br>Imported             | 48347 | VIII |
| USB-412 | FC3654-<br>1  | 18.44 | <i>G. max</i> | Landrace        | China       | Manchuria    | 1920 | Yellow                            | 48282 | IV   |
| USB-414 | FC3157<br>1   | 17.15 | <i>G. max</i> | Landrace        | China       | ND           | 1944 | Kirin<br>Brown<br>Derby           | 48202 | III  |
| USB-415 | FC3203<br>3   | 19.98 | <i>G. max</i> | Landrace        | ND          | ND           | 1954 | No. 1                             | 48375 | 0    |
| USB-416 | PI5487<br>3   | 18.10 | <i>G. max</i> | Landrace        | China       | Heilongjiang | 1922 | No. 196                           | 48348 | II   |
| USB-417 | PI5984<br>5   | 16.14 | <i>G. max</i> | Landrace        | Japan       | Akita        | 1924 | Sohgetsu                          | 48302 | VI   |
| USB-418 | PI6097<br>0   | 15.49 | <i>G. max</i> | Landrace        | China       | ND           | 1924 | Huangdou                          | 48244 | IV   |
| USB-419 | PI6220<br>2-2 | 21.49 | <i>G. max</i> | Landrace        | China       | Hebei        | 1924 | 936                               | 48359 | IV   |
| USB-421 | PI6842<br>3   | 20.66 | <i>G. max</i> | Landrace        | China       | Heilongjiang | 1926 | 5823                              | 48289 | III  |
| USB-422 | PI6843<br>6   | 19.06 | <i>G. max</i> | Landrace        | China       | Heilongjiang | 1926 | 17                                | 48295 | II   |
| USB-423 | PI6852<br>3   | 19.98 | <i>G. max</i> | Landrace        | China       | Heilongjiang | 1926 | 170                               | 48331 | III  |
| USB-424 | PI6867<br>9-2 | 19.41 | <i>G. max</i> | Landrace        | China       | Manchuria    | 1926 | 298                               | 48333 | IV   |
| USB-425 | PI6873<br>1   | 17.74 | <i>G. max</i> | Landrace        | China       | Manchuria    | 1926 | 289                               | 48292 | III  |
| USB-426 | PI6873<br>6   | 19.12 | <i>G. max</i> | Landrace        | China       | Manchuria    | 1926 | 254                               | 48364 | II   |

|         |        |       |               |          |       |                   |      |        |       |     |
|---------|--------|-------|---------------|----------|-------|-------------------|------|--------|-------|-----|
|         | PI6876 |       |               |          |       | Manchuri          |      |        |       |     |
| USB-427 | 5      | 21.73 | <i>G. max</i> | Landrace | China | a                 | 1926 | 65     | 48416 | II  |
|         | PI6881 |       |               |          |       | Heilongji         |      |        |       |     |
| USB-428 | 5      | 22.04 | <i>G. max</i> | Landrace | China | ang               | 1926 | 6450-m | 48476 | II  |
|         | PI7007 |       |               |          |       |                   |      |        |       |     |
| USB-429 | 8      | 24.06 | <i>G. max</i> | Landrace | China | Jilin             | 1926 | 6900   | 48354 | II  |
|         | PI7020 |       |               |          |       |                   |      |        |       |     |
| USB-430 | 1      | 20.70 | <i>G. max</i> | Landrace | China | Jilin             | 1926 | 7548   | 48321 | III |
|         | PI7020 |       |               |          |       |                   |      |        |       |     |
| USB-431 | 8      | 18.39 | <i>G. max</i> | Landrace | China | Liaoning          | ND   | ND     | 48319 | IV  |
|         | PI7024 |       |               |          |       |                   |      |        |       |     |
| USB-432 | 2-2    | 17.60 | <i>G. max</i> | Landrace | China | ND                | ND   | ND     | 48445 | IV  |
|         | PI7961 |       |               |          |       |                   |      |        |       |     |
| USB-433 | 6      | 15.10 | <i>G. max</i> | Landrace | China | Liaoning          | ND   | ND     | 48274 | III |
|         | PI7979 |       |               |          |       |                   |      |        |       |     |
| USB-435 | 7      | 20.16 | <i>G. max</i> | Landrace | ND    | ND                | ND   | ND     | 48307 | III |
|         | PI7983 |       |               |          |       | Heilongji         |      |        |       |     |
| USB-436 | 2      | 15.07 | <i>G. max</i> | Landrace | China | ang               | ND   | ND     | 48202 | V   |
|         | PI7987 |       |               |          |       | Heilongji         |      |        |       |     |
| USB-437 | 0-4    | 14.49 | <i>G. max</i> | Landrace | China | ang               | ND   | ND     | 48236 | IV  |
|         | PI8046 |       |               |          |       |                   |      |        |       |     |
| USB-438 | 6-1    | 17.11 | <i>G. max</i> | Landrace | Japan | Hokkaido          | ND   | ND     | 48294 | III |
|         | PI8067 |       |               |          |       |                   |      |        |       |     |
| USB-439 | 1      | 17.56 | <i>G. max</i> | Landrace | Japan | Tokyo             | ND   | ND     | 48304 | II  |
|         | PI8104 |       |               |          |       |                   |      |        |       |     |
| USB-440 | 2-2    | 24.26 | <i>G. max</i> | Landrace | Japan | Hokkaido          | ND   | ND     | 48300 | IV  |
|         | PI8230 |       |               |          |       |                   |      |        |       |     |
| USB-441 | 2      | 20.39 | <i>G. max</i> | Landrace | Korea | Seoul             | ND   | ND     | 48328 | III |
|         | PI8392 |       |               |          |       |                   |      |        |       |     |
| USB-442 | 5      | 20.07 | <i>G. max</i> | Landrace | Japan | Akita             | ND   | ND     | 48349 | IV  |
|         | PI8450 |       |               |          |       |                   |      |        |       |     |
| USB-443 | 9      | 17.87 | <i>G. max</i> | Landrace | ND    | ND                | ND   | ND     | 48324 | III |
|         | PI8466 |       |               |          |       |                   |      |        |       |     |
| USB-444 | 0      | 13.65 | <i>G. max</i> | Landrace | Korea | Kyonggi           | ND   | ND     | 48323 | IV  |
|         | PI8473 |       |               |          |       |                   |      |        |       |     |
| USB-445 | 4      | 20.02 | <i>G. max</i> | Landrace | Korea | Kyonggi           | ND   | ND     | 48400 | VI  |
|         | PI8608 |       |               |          |       |                   |      |        |       |     |
| USB-446 | 4      | 21.40 | <i>G. max</i> | Landrace | Japan | Hokkaido          | ND   | ND     | 48353 | V   |
|         | PI8698 |       |               |          |       | Cholla            |      |        |       |     |
| USB-447 | 2      | 19.29 | <i>G. max</i> | Landrace | Korea | Puk               | ND   | ND     | 48525 | V   |
|         | PI8707 |       |               |          |       |                   |      |        |       |     |
| USB-448 | 6      | 18.44 | <i>G. max</i> | Landrace | Korea | Hwangh<br>aipukto | ND   | ND     | 48288 | V   |
|         | PI8757 |       |               |          |       | Phyeong           |      | Kokuka |       |     |
| USB-449 | 1      | 16.76 | <i>G. max</i> | Landrace | Korea | yang              | ND   | ku     | 48333 | IV  |
|         | PI8761 |       |               |          |       | Hamkys            |      |        |       |     |
| USB-450 | 8      | 22.68 | <i>G. max</i> | Landrace | Korea | ongpukto          | ND   | ND     | 48341 | III |
|         | PI8763 |       |               |          |       |                   |      |        |       |     |
| USB-451 | 4      | 17.86 | <i>G. max</i> | Landrace | Japan | Saitama           | ND   | ND     | 48285 | III |
|         | PI8830 |       |               |          |       |                   |      |        |       |     |
| USB-452 | 6      | 17.60 | <i>G. max</i> | Landrace | China | Liaoning          | ND   | ND     | 48297 | III |
|         | PI8844 |       |               |          |       |                   |      |        |       |     |
| USB-453 | 8      | 15.75 | <i>G. max</i> | Landrace | China | ND                | ND   | ND     | 48302 | III |
|         | PI8847 |       |               |          |       |                   |      |        |       |     |
| USB-454 | 9      | 23.04 | <i>G. max</i> | Landrace | China | Jilin             | ND   | ND     | 48333 | II  |
|         | PI8849 |       |               |          |       |                   |      |        |       |     |
| USB-455 | 9      | 22.59 | <i>G. max</i> | Landrace | China | Liaoning          | ND   | ND     | 48308 | IV  |
|         | PI8850 |       |               |          |       |                   |      |        |       |     |
| USB-456 | 8      | 14.98 | <i>G. max</i> | Landrace | China | Liaoning          | ND   | ND     | 48577 | II  |
|         | PI9036 |       |               |          |       |                   |      |        |       |     |
| USB-459 | 9      | 20.07 | <i>G. max</i> | Landrace | China | ND                | ND   | ND     | 48536 | IV  |
|         | PI9040 |       |               |          |       |                   |      |        |       |     |
| USB-460 | 6-1    | 15.53 | <i>G. max</i> | Landrace | China | Beijing           | ND   | ND     | 48327 | IV  |
|         | PI9049 |       |               |          |       |                   |      |        |       |     |
| USB-462 | 5N     | 22.02 | <i>G. max</i> | Landrace | China | ND                | ND   | ND     | 48341 | IV  |
|         | PI9049 |       |               |          |       |                   |      |        |       |     |
| USB-463 | 9-1    | 13.62 | <i>G. max</i> | Landrace | China | Hebei             | ND   | ND     | 48259 | III |
|         | PI9057 |       |               |          |       | Northeas          |      |        |       |     |
| USB-464 | 7      | 14.46 | <i>G. max</i> | Landrace | China | t                 | ND   | ND     | 48394 | VI  |
|         | PI9072 |       |               |          |       |                   |      |        |       |     |
| USB-465 | 3      | 17.36 | <i>G. max</i> | Landrace | ND    | ND                | ND   | ND     | 48419 | III |

|         |               |       |               |              |               |                      |      |                          |       |      |
|---------|---------------|-------|---------------|--------------|---------------|----------------------|------|--------------------------|-------|------|
| USB-466 | PI9076<br>8   | 19.63 | <i>G. max</i> | Landrace     | China         | Beijing              | ND   | ND                       | 48383 | VI   |
| USB-467 | PI9108<br>3   | 16.29 | <i>G. max</i> | Landrace     | Korea         | ND                   | ND   | ND                       | 48389 | III  |
| USB-468 | PI9108<br>9   | 17.84 | <i>G. max</i> | Landrace     | China         | Jilin                | ND   | ND                       | 48292 | III  |
| USB-469 | PI9112<br>0   | 14.46 | <i>G. max</i> | Landrace     | China         | Jilin                | ND   | ND                       | 48218 | II   |
| USB-470 | PI9113<br>2-3 | 18.51 | <i>G. max</i> | Landrace     | China         | Jilin                | ND   | ND                       | 48312 | IV   |
| USB-472 | PI9172<br>5   | 18.42 | <i>G. max</i> | Landrace     | Korea         | Phyeong<br>yang      | ND   | ND                       | 48288 | V    |
| USB-473 | PI9173<br>1-1 | 16.80 | <i>G. max</i> | Landrace     | China         | Jilin                | ND   | ND                       | 48280 | IV   |
| USB-474 | PI9260<br>1   | 19.82 | <i>G. max</i> | Landrace     | China         | Jilin                | ND   | ND                       | 48343 | VI   |
| USB-475 | PI9260<br>4   | 19.77 | <i>G. max</i> | Landrace     | China         | Jilin                | ND   | ND                       | 48279 | IV   |
| USB-476 | PI9261<br>8   | 17.31 | <i>G. max</i> | Landrace     | China         | Jilin                | ND   | ND                       | 48201 | III  |
| USB-477 | PI9268<br>8-2 | 18.97 | <i>G. max</i> | Landrace     | China         | Jilin                | ND   | ND                       | 48304 | IV   |
| USB-478 | PI9271<br>8-2 | 19.18 | <i>G. max</i> | Landrace     | China         | Jilin                | ND   | ND                       | 48314 | III  |
| USB-479 | PI9272<br>8   | 21.28 | <i>G. max</i> | Landrace     | China         | Jilin                | ND   | ND                       | 48301 | III  |
| USB-480 | PI9305<br>5   | 23.67 | <i>G. max</i> | Landrace     | China         | Zhejiang             | ND   | ND                       | 48469 | IV   |
| USB-481 | PI9356<br>3   | 20.32 | <i>G. max</i> | Landrace     | China         | Jilin                | ND   | ND                       | 48352 | III  |
| USB-484 | PI1030<br>79  | 18.59 | <i>G. max</i> | Landrace     | China         | Henan                | 1933 | Shang<br>tsai            | 48339 | V    |
| USB-485 | PI1234<br>39  | 17.19 | <i>G. max</i> | Landrace     | Myanm<br>ar   | ND                   | 1937 | No. 1                    | 48334 | VII  |
| USB-486 | PI1235<br>87  | 16.61 | <i>G. max</i> | Landrace     | China         | Hebei                | 1937 | Hopei<br>E602            | 48336 | V    |
| USB-488 | PI1656<br>74  | 17.11 | <i>G. max</i> | Landrace     | China         | Jiangsu              | 1948 | Liuchow<br>B             | 48341 | VIII |
| USB-489 | PI1659<br>29  | 15.04 | <i>G. max</i> | Landrace     | India         | Uttar<br>Pradesh     | 1948 | Bhart                    | 48356 | VII  |
| USB-490 | PI1714<br>38  | 18.58 | <i>G. max</i> | Landrace     | China         | Sichuan              | 1948 | Hwa-an                   | 48422 | VII  |
| USB-492 | PI1805<br>32  | 16.72 | <i>G. max</i> | Old cultivar | German<br>y   | ND                   | 1949 | Strain<br>No.<br>1379/47 | 48374 | 0    |
| USB-494 | PI1928<br>70  | 19.99 | <i>G. max</i> | Landrace     | Indones<br>ia | Jawa                 | 1950 | No. 441                  | 48393 | VII  |
| USB-496 | PI1980<br>67  | 19.96 | <i>G. max</i> | Old cultivar | Sweden        | Malmohu<br>s         | 1951 | Ugra<br>Saja             | 48304 | 0    |
| USB-497 | PI2005<br>03  | 18.09 | <i>G. max</i> | Landrace     | Japan         | ND                   | 1952 | Miyashi<br>ro jun        | 48328 | V    |
| USB-498 | PI2093<br>31  | 20.16 | <i>G. max</i> | Landrace     | Japan         | Hokkaido             | 1953 | No. 1                    | 48354 | III  |
| USB-499 | PI2196<br>98  | 19.20 | <i>G. max</i> | Landrace     | Pakista<br>n  | Northern<br>Areas    | 1954 | Kulat                    | 48425 | VI   |
| USB-500 | PI2273<br>20  | 15.93 | <i>G. max</i> | Landrace     | Japan         | Hokkaido             | 1955 | Daiichih<br>ienuki       | 48432 | IV   |
| USB-502 | PI2353<br>47  | 18.73 | <i>G. max</i> | Landrace     | Japan         | ND                   | 1956 | ND                       | 48288 | IV   |
| USB-504 | PI2536<br>52B | 20.92 | <i>G. max</i> | Landrace     | China         | ND                   | 1958 | No. 3                    | 48275 | IV   |
| USB-505 | PI2536<br>56B | 21.96 | <i>G. max</i> | Landrace     | China         | ND<br>Nordrhei<br>n- | 1958 | No. 7                    | 48406 | IV   |
| USB-506 | PI2574<br>29  | 22.06 | <i>G. max</i> | Old cultivar | German<br>y   | Westfale<br>n        | 1959 | Soja-C.-<br>St. 4/58     | 48331 | 0    |
| USB-510 | PI2901<br>36  | 15.92 | <i>G. max</i> | Landrace     | France        | ND                   | 1963 | Noir 1                   | 48279 | 0    |

|         |               |       |               |          |          |                  |      |                           |       |     |
|---------|---------------|-------|---------------|----------|----------|------------------|------|---------------------------|-------|-----|
| USB-512 | PI3195<br>27  | 23.34 | <i>G. max</i> | Landrace | China    | ND               | 1967 | Plin tin<br>hwang         | 48367 | V   |
| USB-514 | PI3257<br>79  | 20.97 | <i>G. max</i> | Landrace | Brazil   | Salvador         | 1968 | Lucerna                   | 48322 | IX  |
| USB-516 | PI3412<br>45  | 21.32 | <i>G. max</i> | Landrace | Tanzania | ND               | 1969 | Avoyelle<br>s             | 48470 | IX  |
| USB-518 | PI3700<br>57B | 21.33 | <i>G. max</i> | Landrace | Russia   | Primorye         | 1972 | VIR<br>5525               | 48351 | II  |
| USB-520 | PI3775<br>74  | 12.62 | <i>G. max</i> | Landrace | Japan    | Iwate            | 1972 | Hakuto                    | 48439 | IV  |
| USB-521 | PI3786<br>70B | 19.79 | <i>G. max</i> | Landrace | Moldova  | ND               | 1973 | Kisinev<br>skaja 1        | 48354 | II  |
| USB-522 | PI3786<br>82C | 21.97 | <i>G. max</i> | Landrace | Japan    | Akita            | 1973 | ND                        | 48446 | IV  |
| USB-524 | PI3990<br>58  | 21.71 | <i>G. max</i> | Landrace | Korea    | Kangwon          | 1974 | Kangwon<br>n              | 48360 | V   |
| USB-525 | PI4041<br>61  | 11.52 | <i>G. max</i> | Landrace | Georgia  | ND               | 1975 | Mocina<br>be 7            | 48161 | IV  |
| USB-526 | PI4041<br>82  | 22.09 | <i>G. max</i> | Landrace | China    | ND               | 1975 | Sin i tu<br>li rau        | 48385 | III |
| USB-527 | PI4041<br>99  | 15.03 | <i>G. max</i> | Landrace | China    | ND               | 1975 | Sin he<br>do              | 48377 | IV  |
| USB-528 | PI4076<br>59B | 17.95 | <i>G. max</i> | Landrace | China    | ND               | ND   | ND                        | 48398 | III |
| USB-529 | PI4077<br>17  | 15.83 | <i>G. max</i> | Landrace | China    | Jilin            | 1975 | Jin<br>nung<br>No. 5      | 48302 | II  |
| USB-530 | PI4080<br>88  | 15.62 | <i>G. max</i> | Landrace | Korea    | Kyongsang<br>Puk | 1975 | KAERI<br>633-2<br>Akasaya | 48339 | V   |
| USB-531 | PI4167<br>68  | 15.84 | <i>G. max</i> | Landrace | Japan    | Nagano           | 1974 | (Nagan<br>o)              | 48346 | V   |
| USB-533 | PI4170<br>07  | 22.67 | <i>G. max</i> | Landrace | Japan    | ND               | 1974 | Karasu<br>mame            | 48423 | IV  |
| USB-534 | PI4170<br>77  | 15.67 | <i>G. max</i> | Landrace | Japan    | ND               | 1974 | Koushu<br>rei 273         | 48311 | III |
| USB-537 | PI4175<br>50  | 23.07 | <i>G. max</i> | Landrace | Russia   | ND               | 1974 | Amuvsk<br>aje             | 48362 | 0   |
| USB-538 | PI4240<br>05  | 16.36 | <i>G. max</i> | Landrace | Korea    | Kyonggi          | 1976 | 74002                     | 48446 | III |
| USB-540 | PI4305<br>96  | 23.24 | <i>G. max</i> | Landrace | China    | Fujian           | 1978 | Fu pe<br>tou              | 48440 | II  |
| USB-541 | PI4305<br>98B | 21.20 | <i>G. max</i> | Landrace | China    | Fujian           | 1978 | Shuang<br>ching<br>tou    | 48341 | IV  |
| USB-543 | PI4349<br>74  | 21.43 | <i>G. max</i> | Landrace | China    | ND               | 1979 | Seminol<br>e              | 48477 | IX  |
| USB-544 | PI4371<br>23  | 17.48 | <i>G. max</i> | Landrace | Russia   | ND               | 1979 | VIR<br>4575               | 48262 | I   |
| USB-545 | PI4371<br>35B | 17.47 | <i>G. max</i> | Landrace | Russia   | ND               | 1979 | Amurze<br>jscaja          | 48303 | II  |
| USB-546 | PI4371<br>38  | 23.83 | <i>G. max</i> | Landrace | Russia   | Krasnodar        | 1979 | Chabar<br>ovscaja         | 48391 | 0   |
| USB-548 | PI4371<br>68A | 15.32 | <i>G. max</i> | Landrace | Russia   | Krasnodar        | 1979 | VNIISC-<br>2              | 48362 | I   |
| USB-549 | PI4372<br>11B | 14.70 | <i>G. max</i> | Landrace | Moldova  | ND               | 1979 | CSchi<br>44               | 48384 | 0   |
| USB-550 | PI4372<br>87  | 17.96 | <i>G. max</i> | Landrace | Moldova  | ND               | 1979 | VIR<br>4931               | 48362 | 0   |
| USB-551 | PI4372<br>96  | 16.15 | <i>G. max</i> | Landrace | Moldova  | ND               | 1979 | VIR<br>4944               | 48340 | 0   |
| USB-553 | PI4373<br>21  | 16.09 | <i>G. max</i> | Landrace | Russia   | Primorye         | 1979 | Dungan<br>scaja           | 48302 | III |
| USB-554 | PI4373<br>26  | 20.36 | <i>G. max</i> | Landrace | Russia   | Primorye         | 1979 | DV-184<br>Primors         | 48346 | II  |
| USB-555 | PI4373<br>47  | 16.38 | <i>G. max</i> | Landrace | Russia   | Primorye         | 1979 | caja 8                    | 48436 | II  |

|         |               |       |               |          |          |           |      |                            |       |      |
|---------|---------------|-------|---------------|----------|----------|-----------|------|----------------------------|-------|------|
| USB-556 | PI4373<br>66  | 17.39 | <i>G. max</i> | Landrace | Russia   | Primorye  | 1979 | Ussurij<br>scaja<br>155    | 48302 | I    |
| USB-558 | PI4374<br>27A | 17.26 | <i>G. max</i> | Landrace | Russia   | Primorye  | 1979 | Ussurij<br>scaja<br>547    | 48410 | II   |
| USB-559 | PI4374<br>31  | 16.53 | <i>G. max</i> | Landrace | Russia   | Primorye  | 1979 | Ussurij<br>scaja<br>559    | 48267 | II   |
| USB-560 | PI4374<br>76  | 17.77 | <i>G. max</i> | Landrace | Russia   | Primorye  | 1979 | VIR 381                    | 48386 | III  |
| USB-561 | PI4374<br>77B | 16.23 | <i>G. max</i> | Landrace | Russia   | Primorye  | 1979 | VIR 382                    | 48345 | II   |
| USB-562 | PI4374<br>87  | 13.96 | <i>G. max</i> | Landrace | Russia   | Primorye  | 1979 | VIR 1069                   | 48291 | III  |
| USB-563 | PI4375<br>13  | 15.85 | <i>G. max</i> | Landrace | Russia   | Primorye  | 1979 | VIR 4210                   | 48261 | II   |
| USB-564 | PI4375<br>62  | 17.40 | <i>G. max</i> | Landrace | China    | ND        | 1979 | Bej-<br>sjan'-ni-<br>dou   | 48386 | VIII |
| USB-565 | PI4375<br>78  | 21.26 | <i>G. max</i> | Landrace | China    | ND        | 1979 | Chuan-<br>da-dou           | 48261 | III  |
| USB-566 | PI4375<br>94A | 20.24 | <i>G. max</i> | Landrace | China    | ND        | 1979 | Dun-haj-<br>sy-<br>tszjao  | 48626 | I    |
| USB-567 | PI4376<br>09B | 16.52 | <i>G. max</i> | Landrace | China    | ND        | 1979 | DV-<br>2780                | 48289 | II   |
| USB-568 | PI4376<br>15A | 15.37 | <i>G. max</i> | Landrace | China    | ND        | 1979 | DV-<br>2788                | 48436 | 0    |
| USB-569 | PI4376<br>34  | 16.49 | <i>G. max</i> | Landrace | China    | ND        | 1979 | DV-<br>2815                | 48327 | I    |
| USB-570 | PI4376<br>40A | 16.23 | <i>G. max</i> | Landrace | China    | ND        | 1979 | DV-<br>2821                | 48385 | I    |
| USB-571 | PI4377<br>21B | 16.53 | <i>G. max</i> | Landrace | China    | ND        | 1980 | Sy-jue-<br>tsin-<br>mao-do | 48395 | I    |
| USB-573 | PI4377<br>81  | 16.03 | <i>G. max</i> | Landrace | China    | ND        | 1979 | VIR 1330                   | 48359 | I    |
| USB-574 | PI4377<br>98  | 15.69 | <i>G. max</i> | Landrace | China    | ND        | 1979 | VIR 5505                   | 48343 | IV   |
| USB-575 | PI4378<br>15  | 15.85 | <i>G. max</i> | Landrace | China    | Northeast | 1979 | An,dun<br>scaja            | 48287 | I    |
| USB-576 | PI4378<br>75A | 15.35 | <i>G. max</i> | Landrace | China    | ND        | 1979 | Elita<br>691               | 48290 | I    |
| USB-577 | PI4379<br>95A | 16.74 | <i>G. max</i> | Landrace | China    | Northeast | 1979 | VIR 1673                   | 48334 | 0    |
| USB-578 | PI4379<br>99  | 16.96 | <i>G. max</i> | Landrace | China    | Northeast | 1979 | VIR 1711                   | 48320 | 0    |
| USB-579 | PI4380<br>11  | 14.84 | <i>G. max</i> | Landrace | China    | Northeast | 1979 | VIR 1813                   | 48282 | II   |
| USB-580 | PI4380<br>47  | 15.48 | <i>G. max</i> | Landrace | China    | Northeast | 1979 | VIR 2303                   | 48334 | III  |
| USB-581 | PI4381<br>20  | 15.02 | <i>G. max</i> | Landrace | China    | Northeast | 1979 | VIR 2785                   | 48324 | I    |
| USB-582 | PI4381<br>95  | 16.52 | <i>G. max</i> | Landrace | China    | Northeast | 1979 | VIR 4476                   | 48331 | I    |
| USB-583 | PI4382<br>67  | 14.14 | <i>G. max</i> | Landrace | China    | Northeast | 1979 | VIR 5041                   | 48312 | 0    |
| USB-584 | PI4383<br>10  | 17.77 | <i>G. max</i> | Landrace | Korea    | ND        | 1979 | DV-<br>2342                | 48312 | III  |
| USB-585 | PI4383<br>12  | 17.62 | <i>G. max</i> | Landrace | Algeria  | ND        | 1979 | Blaen<br>Small<br>Reaz     | 48494 | III  |
| USB-586 | PI4383<br>29  | 14.07 | <i>G. max</i> | Landrace | Algeria  | ND        | 1979 | 20/46-<br>230              | 48266 | II   |
| USB-587 | PI4383<br>58B | 15.71 | <i>G. max</i> | Landrace | Bulgaria | ND        | 1979 | VU-<br>5819                | 48343 | 0    |
| USB-589 | PI4384<br>50  | 22.11 | <i>G. max</i> | Landrace | Poland   | ND        | 1979 | K.P.<br>3025               | 48397 | II   |
| USB-590 | PI4384<br>92  | 19.51 | <i>G. max</i> | Landrace | USA      | ND        | 1979 | Elton                      | 48308 | I    |

|         |               |       |                |                 |            |           |      |           |       |     |
|---------|---------------|-------|----------------|-----------------|------------|-----------|------|-----------|-------|-----|
| USB-591 | PI4385<br>04B | 22.14 | <i>G. max</i>  | Landrace        | USA        | ND        | 1979 | VIR 24a   | 48386 | II  |
| USB-592 | PI4385<br>09A | 23.42 | <i>G. max</i>  | Landrace        | USA        | ND        | 1979 | VIR 202   | 48432 | I   |
| USB-593 | PI4649<br>13  | 18.65 | <i>G. max</i>  | Landrace        | China      | Liaoning  | 1981 | Dan       | 48302 | IV  |
| USB-594 | PI4667<br>49A | 21.22 | <i>G. max</i>  | Landrace        | China      | Shanghai  | 1982 | Wu Yui    | 48411 | II  |
| USB-595 | PI4673<br>13  | 21.68 | <i>G. max</i>  | Landrace        | China      | Jilin     | 1982 | Huo       | 48356 | 0   |
| USB-596 | PI4689<br>19  | 19.84 | <i>G. max</i>  | Landrace        | China      | Liaoning  | 1982 | Da-hei-qi | 48705 | III |
| USB-597 | PI4758<br>12B | 17.85 | <i>G. max</i>  | Landrace        | China      | Xinjiang  | 1982 | ND        | 48374 | III |
| USB-599 | PI4763<br>44  | 16.24 | <i>G. max</i>  | Landrace        | Uzbekistan | ND        | 1981 | Uzbeks    | 48268 | II  |
| USB-602 | PI4769<br>39  | 17.43 | <i>G. max</i>  | Landrace        | Vietnam    | ND        | 1982 | kaja-2    | 48344 | IV  |
| USB-603 | PI4832<br>53  | 16.06 | <i>G. max</i>  | Landrace        | Brazil     | ND        | 1984 | Den Ha    | 48349 | IX  |
| USB-604 | PI5044<br>95  | 16.38 | <i>G. max</i>  | Landrace        | Taiwan     | ND        | 1986 | Bac       | 48401 | V   |
| USB-607 | PI5076<br>78  | 17.63 | <i>G. max</i>  | Old cultivar    | Russia     | ND        | 1987 | TroPlca   | 48263 | I   |
| USB-608 | PI5080<br>83  | 15.01 | <i>G. max</i>  | Modern cultivar | USA        | Minnesota | 1987 | I         | 48267 | 0   |
| USB-609 | PI5082<br>69  | 17.11 | <i>G. max</i>  | Modern cultivar | USA        | Virginia  | 1987 | Kaohsiu   | 48195 | IV  |
| USB-611 | PI5187<br>11  | 15.68 | <i>G. max</i>  | Landrace        | China      | Jilin     | 1988 | ng No.    | 48319 | II  |
| USB-612 | PI5187<br>59  | 15.43 | <i>G. max</i>  | Landrace        | Taiwan     | ND        | 1988 | 2         | 48274 | VI  |
| USB-613 | PI5254<br>54  | 13.76 | <i>G. max</i>  | Modern cultivar | USA        | Indiana   | 1988 | Fakel     | 48252 | IV  |
| USB-614 | PI5324<br>54  | 13.88 | <i>G. max</i>  | Landrace        | China      | Jiangsu   | 1989 | Spence    | 48315 | 0   |
| USB-615 | PI5336<br>54  | 18.19 | <i>G. max</i>  | Modern cultivar | USA        | Illinois  | 1988 | Tai xing  | 48285 | IV  |
| USB-616 | PI5346<br>48  | 14.93 | <i>G. max</i>  | Modern cultivar | USA        | Ohio      | 1988 | LN83-2356 | 48304 | III |
| USB-617 | PI5398<br>65  | 13.19 | <i>G. max</i>  | Modern cultivar | USA        | Iowa      | 1990 | GR8936    | 48284 | I   |
| USB-618 | PI5399<br>36  | 13.11 | <i>G. max</i>  | Modern cultivar | USA        | ND        | 1990 | HP204     | 48203 | IV  |
| USB-619 | PI5405<br>55  | 16.66 | <i>G. max</i>  | Modern cultivar | USA        | ND        | ND   | A4715     | 48279 | IV  |
| USB-620 | PI5437<br>94  | 17.43 | <i>G. max</i>  | Modern cultivar | USA        | Missouri  | 1990 | ND        | 48163 | IV  |
| USB-622 | PI5478<br>31  | 18.80 | <i>G. soja</i> | Wild soybean    | USA        | Illinois  | 1989 | Delsoy    | 48642 | II  |
| USB-623 | PI5481<br>58  | 19.62 | <i>G. max</i>  | Modern cultivar | USA        | Illinois  | 1954 | L83-0215  | 48315 | IV  |
| USB-628 | PI5484<br>14  | 14.95 | <i>G. max</i>  | Old cultivar    | Japan      | Hokkaido  | 1957 | T16       | 48406 | 0   |
| USB-629 | PI5484<br>40  | 14.56 | <i>G. max</i>  | Old cultivar    | USA        | Arizona   | 1942 | Sioux     | 48333 | VI  |
| USB-630 | PI5484<br>64  | 15.07 | <i>G. max</i>  | Old cultivar    | China      | Tianjin   | 1906 | Armred    | 48381 | V   |

|         |               |       |               |                    |           |                   |      |                                        |       |      |
|---------|---------------|-------|---------------|--------------------|-----------|-------------------|------|----------------------------------------|-------|------|
| USB-632 | PI5484<br>72  | 15.46 | <i>G. max</i> | Old cultivar       | China     | Jiangsu           | 1991 | Missoy                                 | 48427 | VII  |
| USB-633 | PI5484<br>91  | 13.48 | <i>G. max</i> | Old cultivar       | China     | Shanghai          | 1991 | Tarheel<br>Black                       | 48310 | VII  |
| USB-634 | PI5484<br>97  | 14.68 | <i>G. max</i> | Old cultivar       | USA       | South<br>Carolina | 1991 | Yelredo                                | 48373 | VIII |
| USB-635 | PI5485<br>28  | 15.91 | <i>G. max</i> | Modern<br>cultivar | USA       | Indiana           | 1966 | Protana                                | 48433 | II   |
| USB-637 | PI5485<br>47  | 14.79 | <i>G. max</i> | Modern<br>cultivar | USA       | Indiana           | 1967 | Cutler                                 | 48388 | IV   |
| USB-640 | PI5485<br>68  | 14.81 | <i>G. max</i> | Modern<br>cultivar | USA       | Wisconsin         | 1955 | Grant                                  | 48358 | 0    |
| USB-642 | PI5490<br>23B | 17.59 | <i>G. max</i> | Landrace           | China     | Liaoning          | 1990 | Na xiao<br>lu dou                      | 48335 | V    |
| USB-646 | PI5566<br>37  | 21.12 | <i>G. max</i> | Modern<br>cultivar | USA       | ND                | 1991 | A1937                                  | 48258 | I    |
| USB-650 | PI5613<br>21  | 22.09 | <i>G. max</i> | Landrace           | China     | Beijing           | 1992 | Hui nan<br>zi hua<br>xiao hei<br>dou   | 48391 | III  |
| USB-654 | PI5669<br>98A | 21.29 | <i>G. max</i> | Landrace           | Indonesia | ND                | 1993 | MARIF<br>2547                          | 48327 | VIII |
| USB-655 | PI5670<br>56A | 18.07 | <i>G. max</i> | Landrace           | Indonesia | ND                | 1993 | MARIF<br>2649                          | 48501 | VIII |
| USB-656 | PI5670<br>60A | 13.67 | <i>G. max</i> | Landrace           | Indonesia | ND                | 1993 | MARIF<br>2656<br>He qi<br>PIng<br>ding | 48300 | V    |
| USB-658 | PI5671<br>70A | 14.87 | <i>G. max</i> | Landrace           | China     | Jilin             | 1993 | xiang<br>NC                            | 48242 | II   |
| USB-663 | PI5672<br>65  | 15.44 | <i>G. max</i> | Landrace           | China     | Fujian            | 1993 | 9180                                   | 48234 | IV   |
| USB-664 | PI5672<br>72A | 15.75 | <i>G. max</i> | Landrace           | Taiwan    | ND                | 1993 | AV 215<br>Huang<br>PI xiao<br>huang    | 48286 | IV   |
| USB-666 | PI5673<br>31  | 17.43 | <i>G. max</i> | Landrace           | China     | Gansu             | 1993 | dou<br>Wu<br>tong<br>shu               | 48379 | IV   |
| USB-669 | PI5673<br>66A | 18.97 | <i>G. max</i> | Landrace           | China     | Ningxia           | 1993 | huang<br>dou<br>Xu<br>wang             | 48447 | III  |
| USB-670 | PI5673<br>70A | 17.36 | <i>G. max</i> | Landrace           | China     | Ningxia           | 1993 | huang<br>da dou<br>Bai ke              | 48330 | IV   |
| USB-672 | PI5673<br>81B | 17.74 | <i>G. max</i> | Landrace           | China     | Shanxi            | 1993 | huang<br>Ji dan<br>PI bai              | 48296 | V    |
| USB-673 | PI5673<br>90  | 20.22 | <i>G. max</i> | Landrace           | China     | Shanxi            | 1993 | dou<br>Jing<br>yang                    | 48337 | V    |
| USB-674 | PI5673<br>92  | 16.99 | <i>G. max</i> | Landrace           | China     | Shanxi            | 1993 | hong da<br>dou                         | 48343 | V    |
| USB-675 | PI5673<br>94B | 18.04 | <i>G. max</i> | Landrace           | China     | Shanxi            | 1993 | Jiu yue<br>han                         | 48376 | VI   |
| USB-676 | PI5673<br>95  | 19.33 | <i>G. max</i> | Landrace           | China     | Shanxi            | ND   | ND                                     | 48417 | IV   |
| USB-677 | PI5673<br>96B | 15.65 | <i>G. max</i> | Landrace           | China     | Shanxi            | 1993 | Lao shu<br>PI                          | 48325 | IV   |
| USB-678 | PI5673<br>98  | 18.53 | <i>G. max</i> | Landrace           | China     | Shanxi            | 1993 | Lu lan<br>dou                          | 48368 | IV   |

|         |               |       |               |                    |               |                  |      |                                                |       |      |
|---------|---------------|-------|---------------|--------------------|---------------|------------------|------|------------------------------------------------|-------|------|
| USB-679 | PI5674<br>04A | 24.57 | <i>G. max</i> | Landrace           | China         | Shanxi           | 1993 | Wang<br>shan<br>hou                            | 48323 | III  |
| USB-680 | PI5674<br>05  | 20.75 | <i>G. max</i> | Landrace           | China         | Shanxi           | 1993 | Wei zi<br>dou                                  | 48378 | VI   |
| USB-682 | PI5674<br>17B | 12.09 | <i>G. max</i> | Landrace           | China         | Shanxi           | 1993 | Bai gun<br>dou                                 | 48245 | I    |
| USB-684 | PI5674<br>58  | 11.71 | <i>G. max</i> | Landrace           | China         | Shanxi           | 1993 | Ji li<br>huang<br>dou                          | 48306 | IV   |
| USB-687 | PI5675<br>03  | 9.69  | <i>G. max</i> | Landrace           | China         | Hebei            | 1993 | Niu<br>mao<br>huang<br>dou                     | 48184 | IV   |
| USB-688 | PI5675<br>41B | 21.27 | <i>G. max</i> | Landrace           | China         | Shandon<br>g     | 1993 | Gun li<br>huang                                | 48368 | III  |
| USB-689 | PI5675<br>52  | 17.48 | <i>G. max</i> | Landrace           | China         | Shandon<br>g     | 1993 | Huang<br>si li<br>Kao<br>shan                  | 48421 | IV   |
| USB-690 | PI5675<br>56  | 22.26 | <i>G. max</i> | Landrace           | China         | Shandon<br>g     | 1993 | hong<br>Liu yue                                | 48502 | IV   |
| USB-691 | PI5675<br>59  | 18.62 | <i>G. max</i> | Landrace           | China         | Shandon<br>g     | 1993 | xian                                           | 48365 | II   |
| USB-694 | PI5675<br>82A | 19.79 | <i>G. max</i> | Landrace           | China         | Shandon<br>g     | 1993 | Qi si wa                                       | 48391 | IV   |
| USB-696 | PI5675<br>93B | 16.56 | <i>G. max</i> | Landrace           | China         | Shandon<br>g     | 1993 | Xiao bai<br>dou                                | 48320 | IV   |
| USB-697 | PI5675<br>99  | 21.18 | <i>G. max</i> | Landrace           | China         | Shandon<br>g     | 1993 | Xiao<br>Ping<br>ding<br>huang                  | 48382 | III  |
| USB-699 | PI5676<br>38  | 17.43 | <i>G. max</i> | Landrace           | China         | Henan            | 1993 | Min<br>quan<br>wan<br>dou                      | 48452 | IV   |
| USB-700 | PI5676<br>48C | 18.45 | <i>G. max</i> | Landrace           | China         | Henan            | 1993 | Qin<br>yang<br>hui jiao<br>cao bai<br>dou      | 48380 | IV   |
| USB-701 | PI5677<br>21  | 18.14 | <i>G. max</i> | Landrace           | China         | Anhui            | 1993 | Fu yang<br>(45)<br>Tong<br>shan<br>hong<br>mao | 48362 | IV   |
| USB-703 | PI5677<br>72  | 21.77 | <i>G. max</i> | Landrace           | China         | Jiangsu          | 1993 | you                                            | 48388 | IV   |
| USB-705 | PI5744<br>78C | 14.97 | <i>G. max</i> | Landrace           | China         | Heilongji<br>ang | 1993 | Hai jiao<br>zhao                               | 48247 | II   |
| USB-706 | PI5783<br>16C | 16.22 | <i>G. max</i> | Landrace           | Nepal         | ND               | 1994 | ND                                             | 48384 | VIII |
| USB-707 | PI5783<br>29C | 25.43 | <i>G. max</i> | Modern<br>cultivar | Argenti<br>na | ND               | 1994 | OFPEC<br>Cordob<br>esa                         | 48298 | VI   |
| USB-708 | PI5783<br>30  | 19.00 | <i>G. max</i> | Modern<br>cultivar | Argenti<br>na | ND               | 1994 | OFPEC<br>Nortena<br>He nan                     | 48316 | VIII |
| USB-710 | PI5784<br>90  | 17.94 | <i>G. max</i> | Landrace           | China         | ND               | 1994 | zao<br>feng<br>No. 1                           | 48347 | IV   |
| USB-711 | PI5833<br>66  | 21.44 | <i>G. max</i> | Modern<br>cultivar | USA           | Virginia         | 1994 | Chesap<br>eake                                 | 48216 | IV   |

|         |               |       |               |          |       |         |      |                                                                               |       |      |
|---------|---------------|-------|---------------|----------|-------|---------|------|-------------------------------------------------------------------------------|-------|------|
| USB-712 | PI5875<br>60A | 20.21 | <i>G. max</i> | Landrace | China | Jiangsu | 1995 | Dan tu<br>ba yue<br>bai jia                                                   | 48458 | VII  |
| USB-713 | PI5875<br>75A | 17.94 | <i>G. max</i> | Landrace | China | Jiangsu | 1994 | Sha<br>zhou jie<br>jie si<br>Jiang<br>pu<br>huang<br>da dou<br>jia            | 48353 | IV   |
| USB-715 | PI5875<br>82  | 18.63 | <i>G. max</i> | Landrace | China | Jiangsu | 1994 | jia                                                                           | 48328 | VI   |
| USB-717 | PI5876<br>68A | 17.11 | <i>G. max</i> | Landrace | China | Anhui   | 1994 | Hui mei<br>dou<br>Nan<br>zhang<br>hei<br>huang<br>dou<br>Wu<br>ming 18<br>jia | 48372 | VI   |
| USB-718 | PI5877<br>88B | 17.95 | <i>G. max</i> | Landrace | China | Jiangsu | 1994 | 48379                                                                         | VI    |      |
| USB-719 | PI5877<br>94  | 21.42 | <i>G. max</i> | Landrace | China | Hubei   | 1994 | 48374                                                                         | VI    |      |
| USB-728 | PI5879<br>63  | 18.42 | <i>G. max</i> | Landrace | China | Hunan   | 1994 | Yao dou                                                                       | 48354 | X    |
| USB-729 | PI5880<br>15B | 17.06 | <i>G. max</i> | Landrace | China | Sichuan | 1994 | Bai mao<br>dou                                                                | 48334 | IV   |
| USB-730 | PI5880<br>26C | 17.74 | <i>G. max</i> | Landrace | China | Sichuan | 1994 | Luo xi<br>ZDD                                                                 | 48327 | IV   |
| USB-732 | PI5929<br>19  | 18.06 | <i>G. max</i> | Landrace | China | ND      | 1994 | 17688<br>Gong<br>dou No.                                                      | 48352 | I    |
| USB-733 | PI5929<br>28  | 16.95 | <i>G. max</i> | Landrace | China | ND      | 1994 | 4                                                                             | 48323 | II   |
| USB-734 | PI5929<br>32  | 18.88 | <i>G. max</i> | Landrace | China | ND      | 1994 | Zao shu<br>No. 9                                                              | 48343 | II   |
| USB-735 | PI5929<br>36  | 21.17 | <i>G. max</i> | Landrace | China | ND      | 1994 | ZDD<br>18632                                                                  | 48291 | II   |
| USB-737 | PI5944<br>09B | 16.91 | <i>G. max</i> | Landrace | China | Anhui   | 1996 | 86-8-39                                                                       | 48317 | III  |
| USB-740 | PI5944<br>67  | 16.19 | <i>G. max</i> | Landrace | China | Sichuan | 1996 | Zi PI<br>dou                                                                  | 48331 | III  |
| USB-741 | PI5944<br>70C | 17.90 | <i>G. max</i> | Landrace | China | Sichuan | 1996 | Zao dou<br>zi                                                                 | 48376 | VIII |
| USB-742 | PI5944<br>87  | 18.14 | <i>G. max</i> | Landrace | China | ND      | ND   | ND<br>Za se<br>huang<br>dou No.                                               | 48486 | VIII |
| USB-743 | PI5944<br>97  | 19.65 | <i>G. max</i> | Landrace | China | Sichuan | 1996 | 3<br>Liu yue<br>dou No.                                                       | 48396 | VIII |
| USB-745 | PI5946<br>60A | 18.38 | <i>G. max</i> | Landrace | China | Guizhou | 1996 | 1                                                                             | 48375 | V    |
| USB-748 | PI5947<br>53A | 19.71 | <i>G. max</i> | Landrace | China | Guangxi | 1996 | Hei qi<br>da dou                                                              | 48437 | VII  |
| USB-749 | PI5947<br>57  | 18.21 | <i>G. max</i> | Landrace | China | Guangxi | ND   | ND                                                                            | 48401 | IX   |
| USB-750 | PI5947<br>69  | 19.25 | <i>G. max</i> | Landrace | China | Guangxi | 1996 | Luo wei<br>qing<br>dou                                                        | 48407 | IX   |
| USB-751 | PI5948<br>05A | 16.91 | <i>G. max</i> | Landrace | China | Yunnan  | 1996 | Huang<br>PI dou<br>Xiao<br>huang<br>mao<br>dou<br>Xi<br>huang<br>dou          | 48363 | VII  |
| USB-752 | PI5948<br>10B | 14.91 | <i>G. max</i> | Landrace | China | Yunnan  | 1996 | 48434                                                                         | VI    |      |
| USB-753 | PI5948<br>22  | 19.23 | <i>G. max</i> | Landrace | China | Yunnan  | 1996 | 48436                                                                         | IX    |      |

|         |               |       |               |                    |        |               |      |                                             |       |      |
|---------|---------------|-------|---------------|--------------------|--------|---------------|------|---------------------------------------------|-------|------|
| USB-754 | PI5948<br>30  | 20.37 | <i>G. max</i> | Landrace           | China  | Yunnan        | 1996 | Lu<br>huang<br>dou                          | 48490 | X    |
| USB-755 | PI5948<br>34A | 19.09 | <i>G. max</i> | Landrace           | China  | Yunnan        | 1996 | Wu yue<br>bai dou                           | 48360 | VII  |
| USB-756 | PI5948<br>39A | 20.43 | <i>G. max</i> | Landrace           | China  | Yunnan        | 1996 | Huang<br>dou<br>De<br>hong<br>xuan<br>No. 8 | 48504 | VIII |
| USB-758 | PI5948<br>83  | 16.80 | <i>G. max</i> | Landrace           | China  | Yunnan        | 1996 | No. 8                                       | 48328 | IV   |
| USB-759 | PI5973<br>84  | 19.36 | <i>G. max</i> | Modern<br>cultivar | USA    | Illinois      | 1997 | LN89-<br>3615                               | 48277 | IV   |
| USB-761 | PI5974<br>02  | 23.57 | <i>G. max</i> | Landrace           | Russia | Krasnod<br>ar | 1996 | Runo<br>Liao<br>dou 12                      | 48338 | 0    |
| USB-762 | PI6024<br>92  | 20.22 | <i>G. max</i> | Landrace           | China  | Liaoning      | 1997 | 12                                          | 48656 | III  |
| USB-763 | PI6031<br>74A | 17.42 | <i>G. max</i> | Landrace           | Korea  | ND            | 1997 | ND                                          | 48377 | IV   |
| USB-765 | PI6033<br>08A | 17.36 | <i>G. max</i> | Landrace           | China  | ND            | 1998 | Niu xin<br>hong<br>ZDD00                    | 48377 | I    |
| USB-768 | PI6033<br>56  | 15.71 | <i>G. max</i> | Landrace           | China  | Jilin         | 1998 | 475<br>ZDD01                                | 48312 | I    |
| USB-769 | PI6034<br>01  | 17.98 | <i>G. max</i> | Landrace           | China  | Liaoning      | 1998 | 149<br>ZDD01                                | 48278 | IV   |
| USB-771 | PI6034<br>08  | 19.55 | <i>G. max</i> | Landrace           | China  | Liaoning      | 1998 | 288<br>ZDD00                                | 48410 | I    |
| USB-772 | PI6034<br>12A | 17.42 | <i>G. max</i> | Landrace           | China  | ND            | 1998 | 1460<br>ZDD00                               | 48463 | II   |
| USB-773 | PI6034<br>21B | 18.69 | <i>G. max</i> | Landrace           | China  | ND            | 1998 | 1502<br>ZDD18                               | 48481 | III  |
| USB-776 | PI6034<br>46  | 16.71 | <i>G. max</i> | Landrace           | China  | Neimong<br>oi | 1998 | 377<br>ZDD00                                | 48335 | II   |
| USB-777 | PI6034<br>51A | 16.51 | <i>G. max</i> | Landrace           | China  | ND            | 1998 | 2757<br>Mi lan                              | 48320 | III  |
| USB-778 | PI6034<br>57B | 18.15 | <i>G. max</i> | Landrace           | China  | ND            | 1998 | dou zi<br>Jiang<br>nan<br>qing              | 48331 | IV   |
| USB-779 | PI6034<br>77A | 20.56 | <i>G. max</i> | Landrace           | China  | ND            | 1998 | 48356                                       | III   |      |
| USB-780 | PI6034<br>90  | 13.66 | <i>G. max</i> | Landrace           | China  | Shandon<br>g  | 1998 | Hei you<br>dou<br>Xiao<br>hong<br>dou       | 48298 | IV   |
| USB-781 | PI6034<br>96B | 15.76 | <i>G. max</i> | Landrace           | China  | ND            | 1998 | ZDD01                                       | 48329 | IV   |
| USB-782 | PI6035<br>02A | 15.64 | <i>G. max</i> | Landrace           | China  | ND            | 1998 | 0273<br>ZDD10                               | 48669 | III  |
| USB-783 | PI6035<br>05  | 15.43 | <i>G. max</i> | Landrace           | China  | ND            | 1998 | 371<br>Xiao li                              | 48465 | IV   |
| USB-784 | PI6035<br>10  | 13.82 | <i>G. max</i> | Landrace           | China  | Shanxi        | 1998 | bai<br>ZDD10                                | 48393 | V    |
| USB-786 | PI6035<br>23  | 22.76 | <i>G. max</i> | Landrace           | China  | Shanxi        | 1998 | 686<br>Hong li                              | 48383 | V    |
| USB-787 | PI6035<br>32  | 16.87 | <i>G. max</i> | Landrace           | China  | Shanxi        | 1998 | huang<br>dou<br>Da niu<br>mao<br>huang      | 48380 | VI   |
| USB-788 | PI6035<br>34B | 19.19 | <i>G. max</i> | Landrace           | China  | ND            | 2000 | 48384                                       | VIII  |      |
| USB-792 | PI6035<br>54B | 18.40 | <i>G. max</i> | Landrace           | China  | ND            | ND   | ND                                          | 48416 | IV   |
| USB-793 | PI6035<br>57  | 14.70 | <i>G. max</i> | Landrace           | China  | ND            | ND   | ND<br>ZDD08                                 | 48404 | IV   |
| USB-794 | PI6035<br>74  | 16.76 | <i>G. max</i> | Landrace           | China  | Shanxi        | 1998 | 897<br>ZDD09                                | 48397 | IV   |
| USB-795 | PI6035<br>83  | 22.25 | <i>G. max</i> | Landrace           | China  | Shanxi        | 1998 | 057                                         | 48438 | IV   |
| USB-798 | PI6036<br>87A | 17.06 | <i>G. max</i> | Landrace           | China  | ND            | ND   | ND                                          | 48320 | IV   |

|         |               |       |               |                    |         |                   |      |                                                         |       |      |
|---------|---------------|-------|---------------|--------------------|---------|-------------------|------|---------------------------------------------------------|-------|------|
| USB-799 | PI6036<br>96  | 16.55 | <i>G. max</i> | Landrace           | China   | Jiangsu           | 1998 | Shu<br>yang<br>qiu dou<br>jia<br>Ma you<br>bao No.<br>2 | 48432 | VI   |
| USB-800 | PI6037<br>40B | 20.11 | <i>G. max</i> | Landrace           | China   | Sichuan           | 1998 |                                                         | 48421 | IX   |
| USB-801 | PI6039<br>10C | 16.16 | <i>G. max</i> | Landrace           | Korea   | ND                | 1998 | Cin                                                     | 48370 | V    |
| USB-802 | PI6039<br>11B | 16.50 | <i>G. max</i> | Landrace           | Korea   | ND                | 1998 | Jijori                                                  | 48331 | III  |
| USB-803 | PI6058<br>39A | 19.91 | <i>G. max</i> | Landrace           | Vietnam | Hagiang           | 1998 | Xam si<br>man                                           | 48353 | IV   |
| USB-805 | PI6196<br>15  | 16.84 | <i>G. max</i> | Modern<br>cultivar | USA     | North<br>Carolina | 2001 | N6201                                                   | 48306 | VI   |
| USB-806 | PI6288<br>34  | 18.30 | <i>G. max</i> | Modern<br>cultivar | Brazil  | ND                | 2001 | FT-16<br>Ocepar-<br>3                                   | 48347 | VIII |
| USB-807 | PI6288<br>67  | 19.49 | <i>G. max</i> | Modern<br>cultivar | Brazil  | ND                | 2001 | (Primav<br>era)<br>VG                                   | 48318 | VI   |
| USB-812 | PI6326<br>54  | 19.41 | <i>G. max</i> | Landrace           | Vietnam | ND                | 2003 | 4763                                                    | 48565 | V    |
| USB-814 | PI6329<br>43B | 21.24 | <i>G. max</i> | Landrace           | Vietnam | Dong Nai          | 2001 | Dau<br>nanh<br>Viet.                                    | 48573 | VII  |
| USB-818 | PI6538<br>74B | 25.28 | <i>G. max</i> | Landrace           | Vietnam | ND                | 2008 | Donor<br>No. 29                                         | 48385 | II   |
| USB-819 | PI6566<br>47  | 18.96 | <i>G. max</i> | Modern<br>cultivar | USA     | Mississip<br>pi   | 2009 | DS4-<br>SCN05                                           | 48289 | IV   |
